# Supplementary material for: Heterocornols from the Sponge-Derived Fungus Pestalotiopsis heterocornis with Anti-Inflammatory Activity
Source: Mar Drugs. 2021 Oct 20;19(11):585. doi: 10.3390/md19110585 (PMC8620458; doi:10.3390/md19110585)
Supplement: Supplementary file 1 [file marinedrugs-19-00585-s001.zip › marinedrugs-1371309-supplementary.pdf]

## Supporting Information

### Heterocornols from the Sponge-Derived Fungus *Pestalotiopsis heterocornis* with Anti-Inflammatory Activity

Hui Lei <sup>a</sup>, Xiaoxu Bi <sup>b</sup>, Xiuping Lin <sup>c</sup>, Jianglian She <sup>c</sup>, Xiaowei Luo <sup>d</sup>, Hong Niu <sup>a</sup>, Dan Zhang <sup>a</sup> and Bin Yang <sup>c,\*</sup>

<sup>a</sup> School of Pharmacy, Southwest Medical University, Luzhou 646000, China; huilei@swmu.edu.cn; dawn123454@swmu.edu.cn; zhangdan@swmu.edu.cn

<sup>b</sup> College of Agriculture and Life Sciences, Kunming University, Kunming 50241, China; bxx2797@163.com

<sup>c</sup> CAS Key Laboratory of Tropical Marine Bio-resources and Ecology, Guangdong Key Laboratory of Marine Materia Medica, South China Sea Institute of Oceanology, Chinese Academy of Sciences, Guangzhou 510301, China

<sup>d</sup> Institute of Marine Drugs, Guangxi University of Chinese Medicine, Nanning 530200, China

\*Correspondence: yangbin@scsio.ac.cn (B. Yang); Tel: +86-020-89023174 (B.Y.)

Figure S1. HRESI-MS spectrum of the new compound **1**

Figure S2. <sup>1</sup>H NMR (500 MHz, CD<sub>3</sub>OD) spectrum of the new compound **1**

Figure S3. <sup>13</sup>C NMR (125 MHz, CD<sub>3</sub>OD) spectrum of the new compound **1**

Figure S4. HSQC spectrum of the new compound **1**

Figure S5. HMBC spectrum of the new compound **1**

Figure S6. COSY spectrum of the new compound **1**

Figure S7. NOESY spectrum of the new compound **1**

Figure S8. HRESI-MS spectrum of the new compound **2**

Figure S9. <sup>1</sup>H NMR (500 MHz, CD<sub>3</sub>OD) spectrum of the new compound **2**

Figure S10. <sup>13</sup>C NMR (125 MHz, CD<sub>3</sub>OD) spectrum of the new compound **2**

Figure S11. HSQC spectrum of the new compound **2**

Figure S12. HMBC spectrum of the new compound **2**

Figure S13. COSY spectrum of the new compound **2**

Figure S14. NOESY spectrum of the new compound **2**

Figure S15. HRESI-MS spectrum of the new compound **3**

Figure S16.  $^1\text{H}$  NMR (500 MHz,  $\text{CD}_3\text{OD}$ ) spectrum of the new compound **3**

Figure S17.  $^{13}\text{C}$  NMR (125 MHz,  $\text{CD}_3\text{OD}$ ) spectrum of the new compound **3**

Figure S18. HSQC spectrum of the new compound **3**

Figure S19. HMBC spectrum of the new compound **3**

Figure S20. NOESY spectrum of the new compound **3**

Figure S21. HRESI-MS spectrum of the new compound **4**

Figure S22.  $^1\text{H}$  NMR (500 MHz,  $\text{CD}_3\text{OD}$ ) spectrum of the new compound **4**

Figure S23.  $^{13}\text{C}$  NMR (125 MHz,  $\text{CD}_3\text{OD}$ ) spectrum of the new compound **4**

Figure S24. HSQC spectrum of the new compound **4**

Figure S25. HMBC spectrum of the new compound **4**

Figure S26. COSY spectrum of the new compound **4**

Figure S27. NOESY spectrum of the new compound **4**

Figure S28. calculated and experimental ECD spectras of **3** and **4** using a truncated model.

Figure S29. calculated and experimental ECD spectras of **3** and **4**.

Figure S30. The data of DP4plus method of compound **3**

Figure S31. Comparison of the experimental  $^{13}\text{C}$  NMR data and mean absolute error of compound **3**

Figure S32. DP4<sup>+</sup> probability of  $^{13}\text{C}$  NMR chemical shifts (compound **3**) .

Figure S33. The data of DP4plus method of compound **4**

Figure S34. Comparison of the experimental  $^{13}\text{C}$  NMR data and mean absolute error of compound **4**

Figure S35. DP4<sup>+</sup> probability of  $^{13}\text{C}$  NMR chemical shifts (compound **4**) .

Figure S36. HRESI-MS spectrum of the new compound **5**

Figure S37.  $^1\text{H}$  NMR (500 MHz,  $\text{CD}_3\text{OD}$ ) spectrum of the new compound **5**

Figure S38.  $^{13}\text{C}$  NMR (125 MHz,  $\text{CD}_3\text{OD}$ ) spectrum of the new compound **5**

Figure S39.  $^{135}\text{DEPT}$  (125 MHz,  $\text{CD}_3\text{OD}$ ) spectrum of the new compound **5**

Figure S40. HSQC spectrum of the new compound **5**

Figure S41. HMBC spectrum of the new compound **5**

Figure S42. COSY spectrum of the new compound **5**

Figure S43. HRESI-MS spectrum of compound **6**

Figure S44.  $^1\text{H}$  NMR (500 MHz,  $\text{CD}_3\text{OD}$ ) spectrum of compound **6**

Figure S45.  $^{13}\text{C}$  NMR (125 MHz,  $\text{CD}_3\text{OD}$ ) spectrum of compound **6**

Figure S46. HSQC spectrum of compound **6**

Figure S47. HMBC spectrum of compound **6**

Figure S48. HRESI-MS spectrum of the new compound **7**

Figure S49.  $^1\text{H}$  NMR (500 MHz,  $\text{CD}_3\text{OD}$ ) spectrum of the new compound **7**

Figure S50.  $^{13}\text{C}$  NMR (125 MHz,  $\text{CD}_3\text{OD}$ ) spectrum of the new compound **7**

Figure S51. HSQC spectrum of the new compound **7**

Figure S52. HMBC spectrum of the new compound **7**

Figure S53. HRESI-MS spectrum of the new compound **8**

Figure S54.  $^1\text{H}$  NMR (500 MHz,  $\text{CD}_3\text{OD}$ ) spectrum of the new compound **8**

Figure S55.  $^{13}\text{C}$  NMR (125 MHz,  $\text{CD}_3\text{OD}$ ) spectrum of the new compound **8**

Figure S56. HSQC spectrum of the new compound **8**

Figure S57. HMBC spectrum of the new compound **8**

Figure S58. HRESI-MS spectrum of the new compound **9**

Figure S59. EI-MS spectrum of the new compound **9**

Figure S60.  $^1\text{H}$  NMR (500 MHz,  $\text{CDCl}_3$ ) spectrum of the new compound **9**

Figure S61.  $^{13}\text{C}$  NMR (125 MHz,  $\text{CDCl}_3$ ) spectrum of the new compound **9**

Figure S62. HSQC spectrum of the new compound **9**

Figure S63. HMBC spectrum of the new compound **9**

Figure S64. HPLC chromatograms of EtOAc extracts monitored

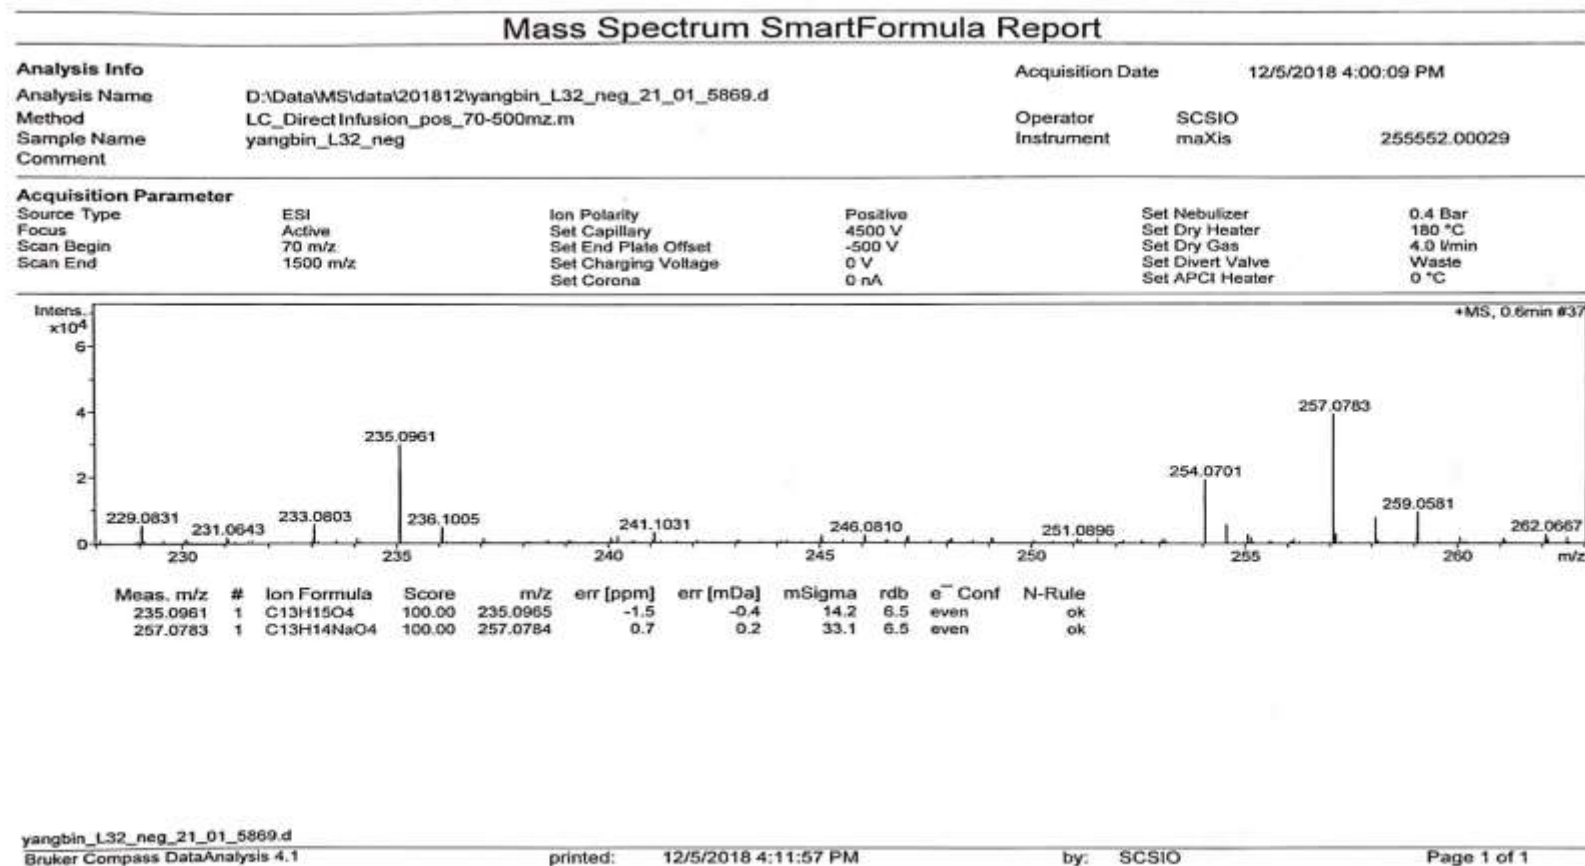

Figure S1. HRESI-MS spectrum of the new compound **1**

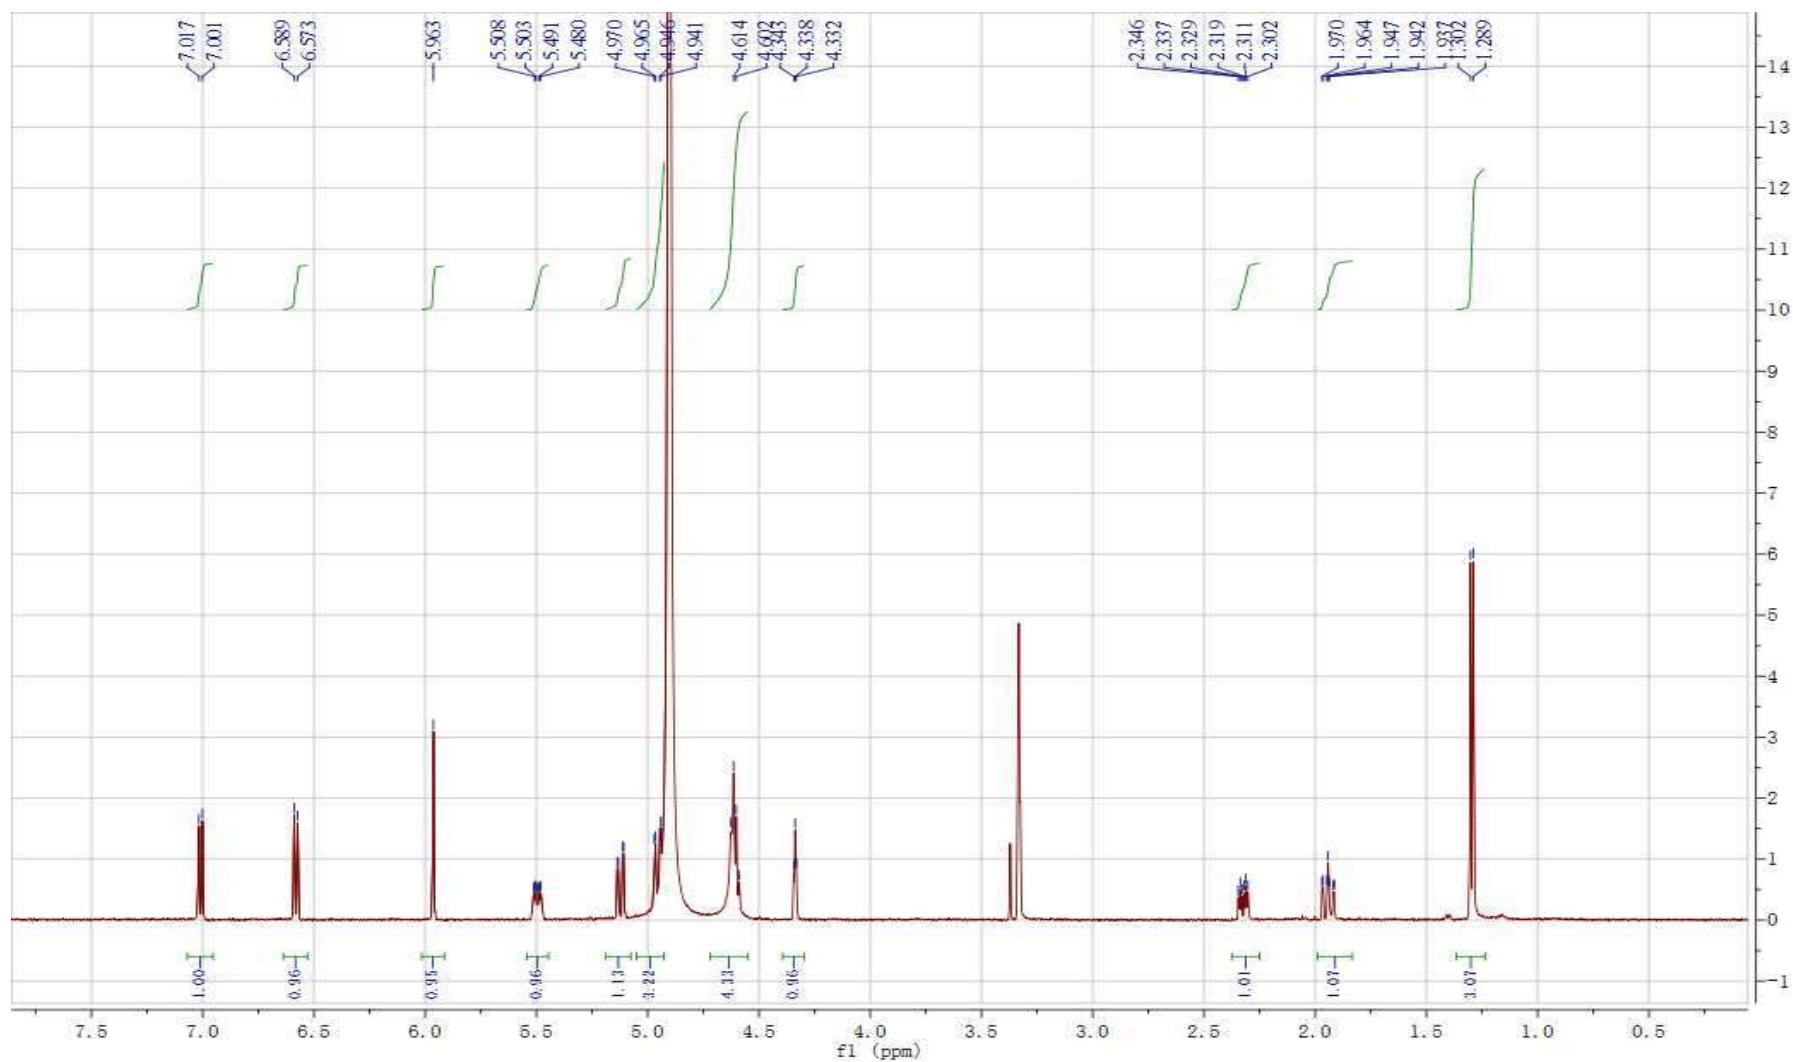

Figure S2.  $^1\text{H}$  NMR (500 MHz,  $\text{CD}_3\text{OD}$ ) spectrum of the new compound **1**

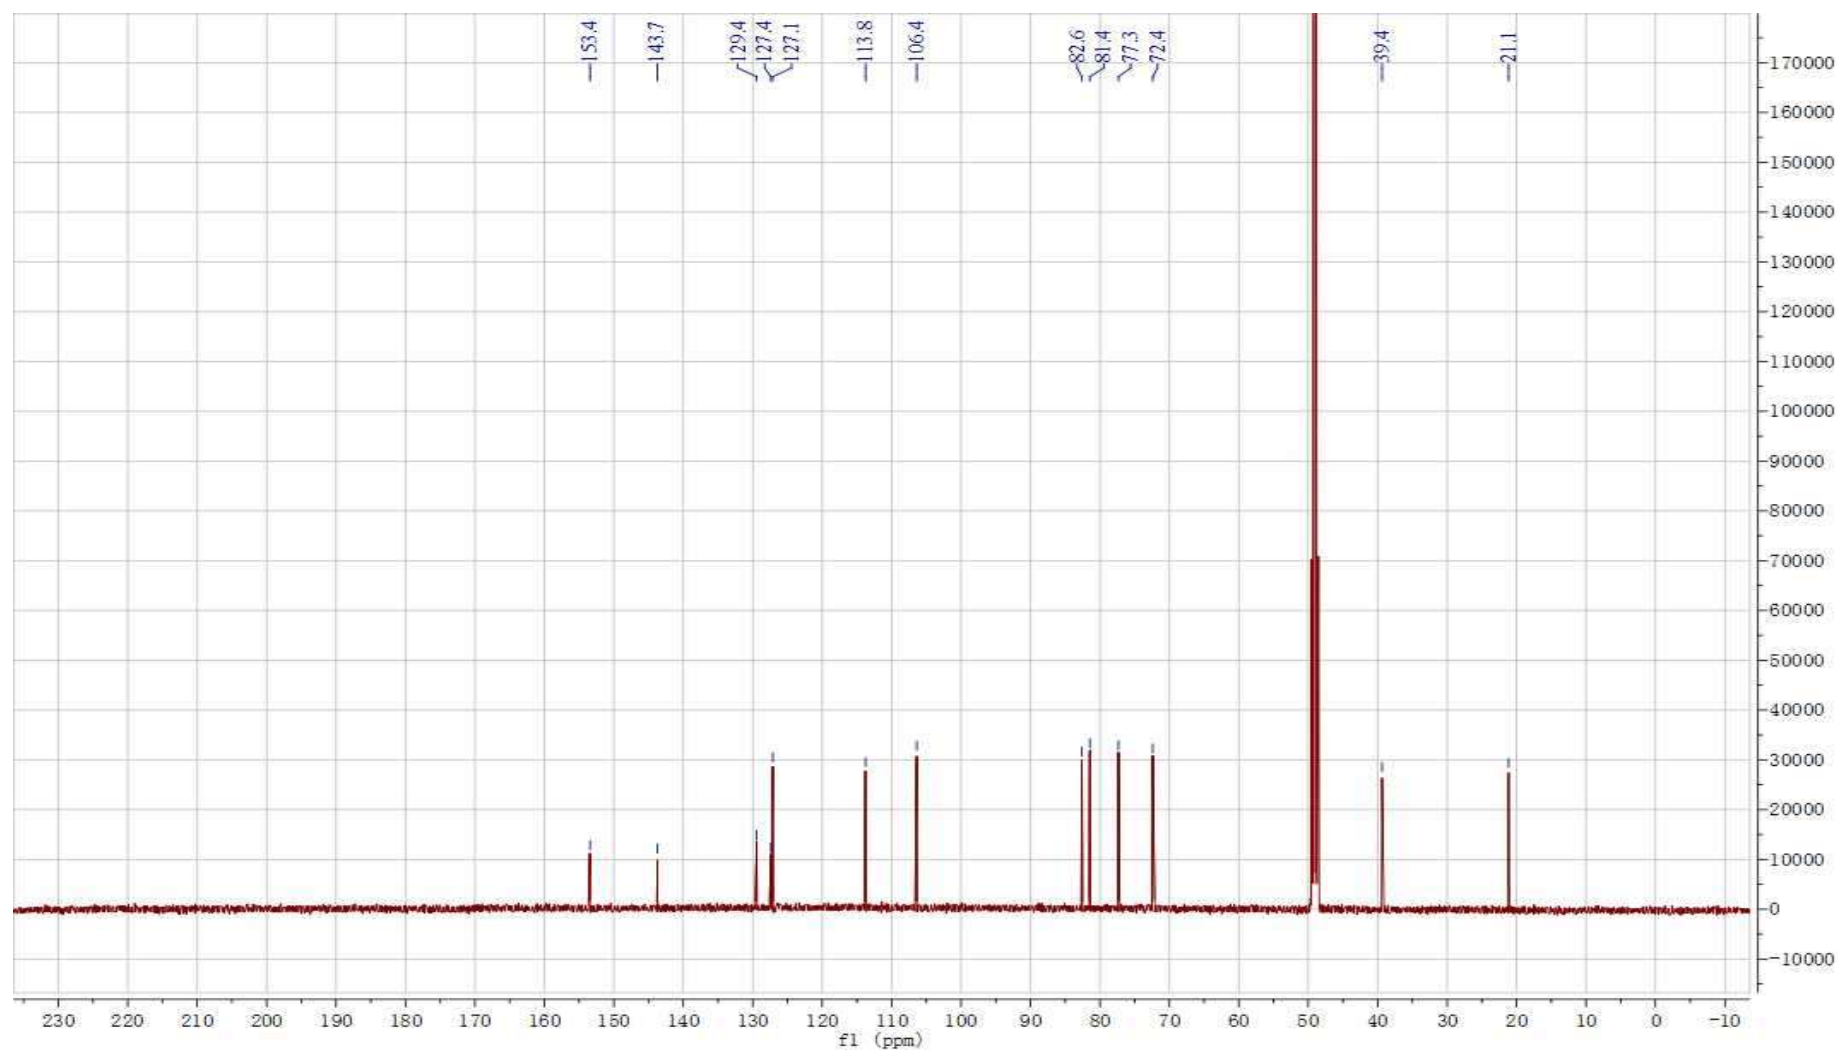

Figure S3.  $^{13}\text{C}$  NMR (125 MHz,  $\text{CD}_3\text{OD}$ ) spectrum of the new compound **1**

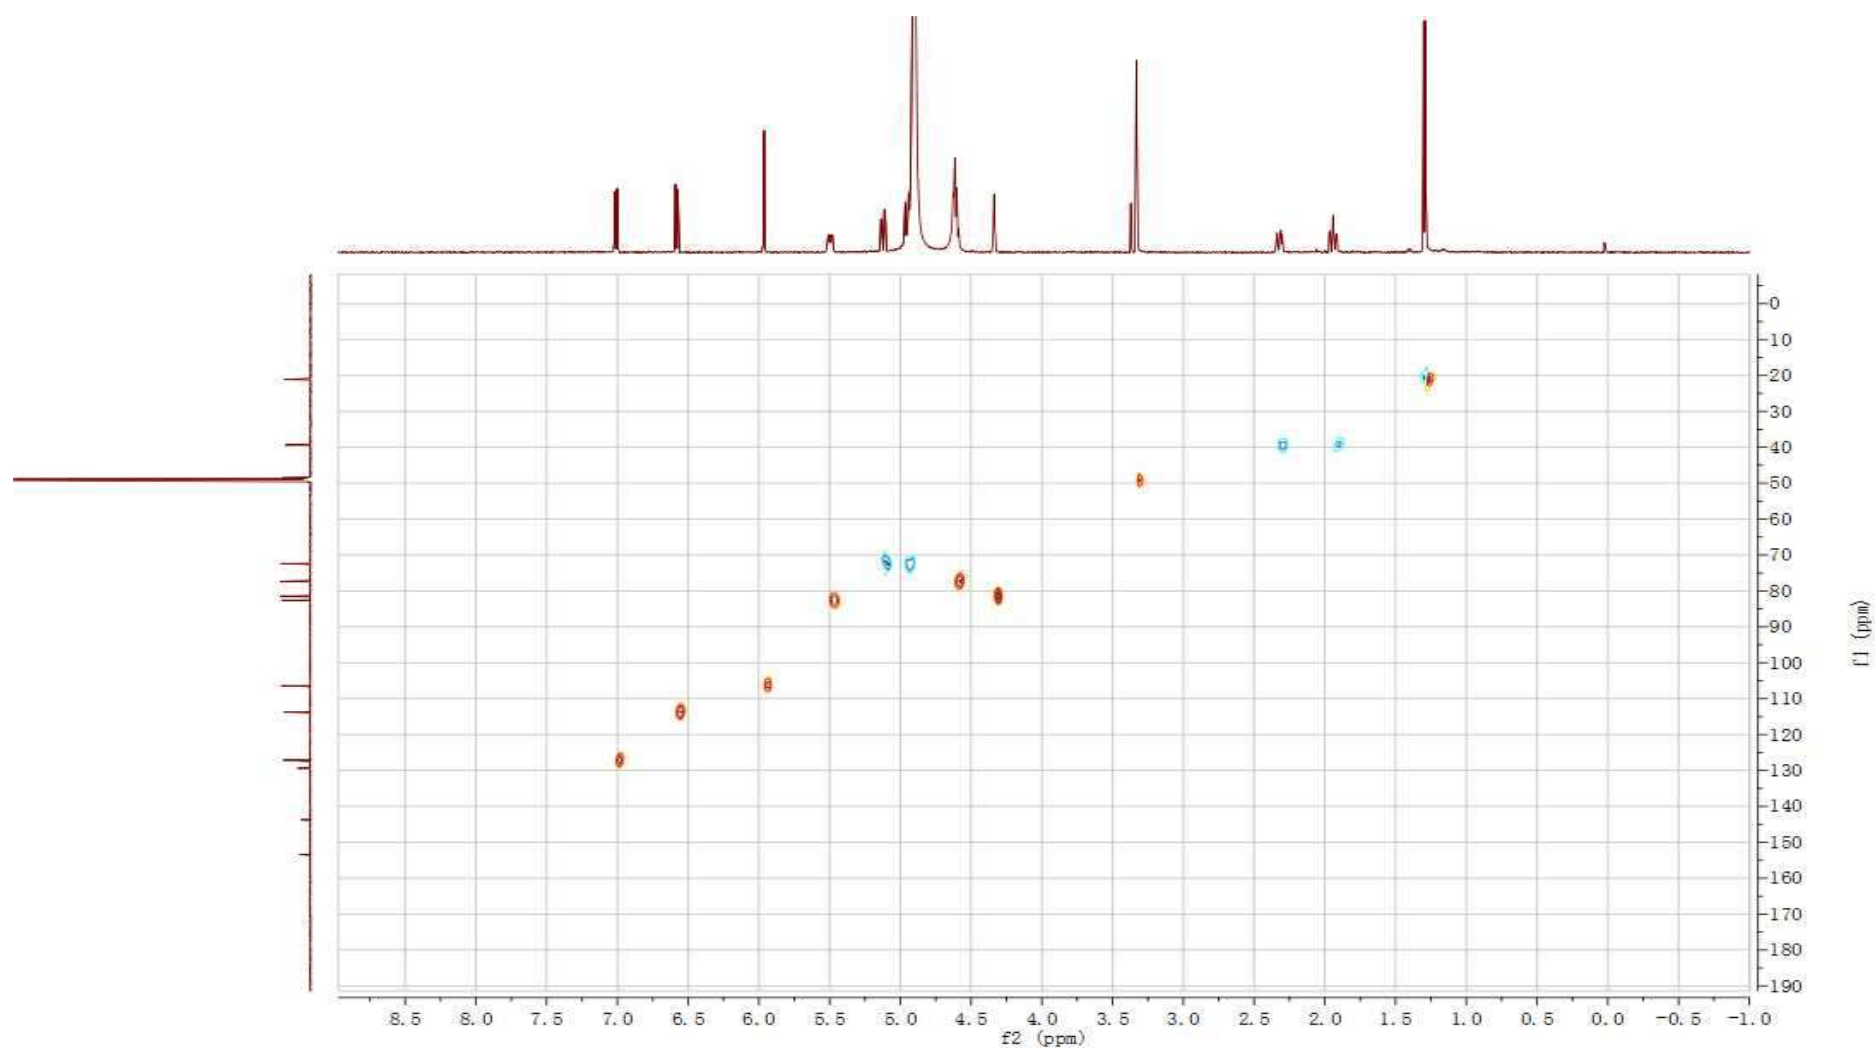

Figure S4. HSQC spectrum of the new compound **1**

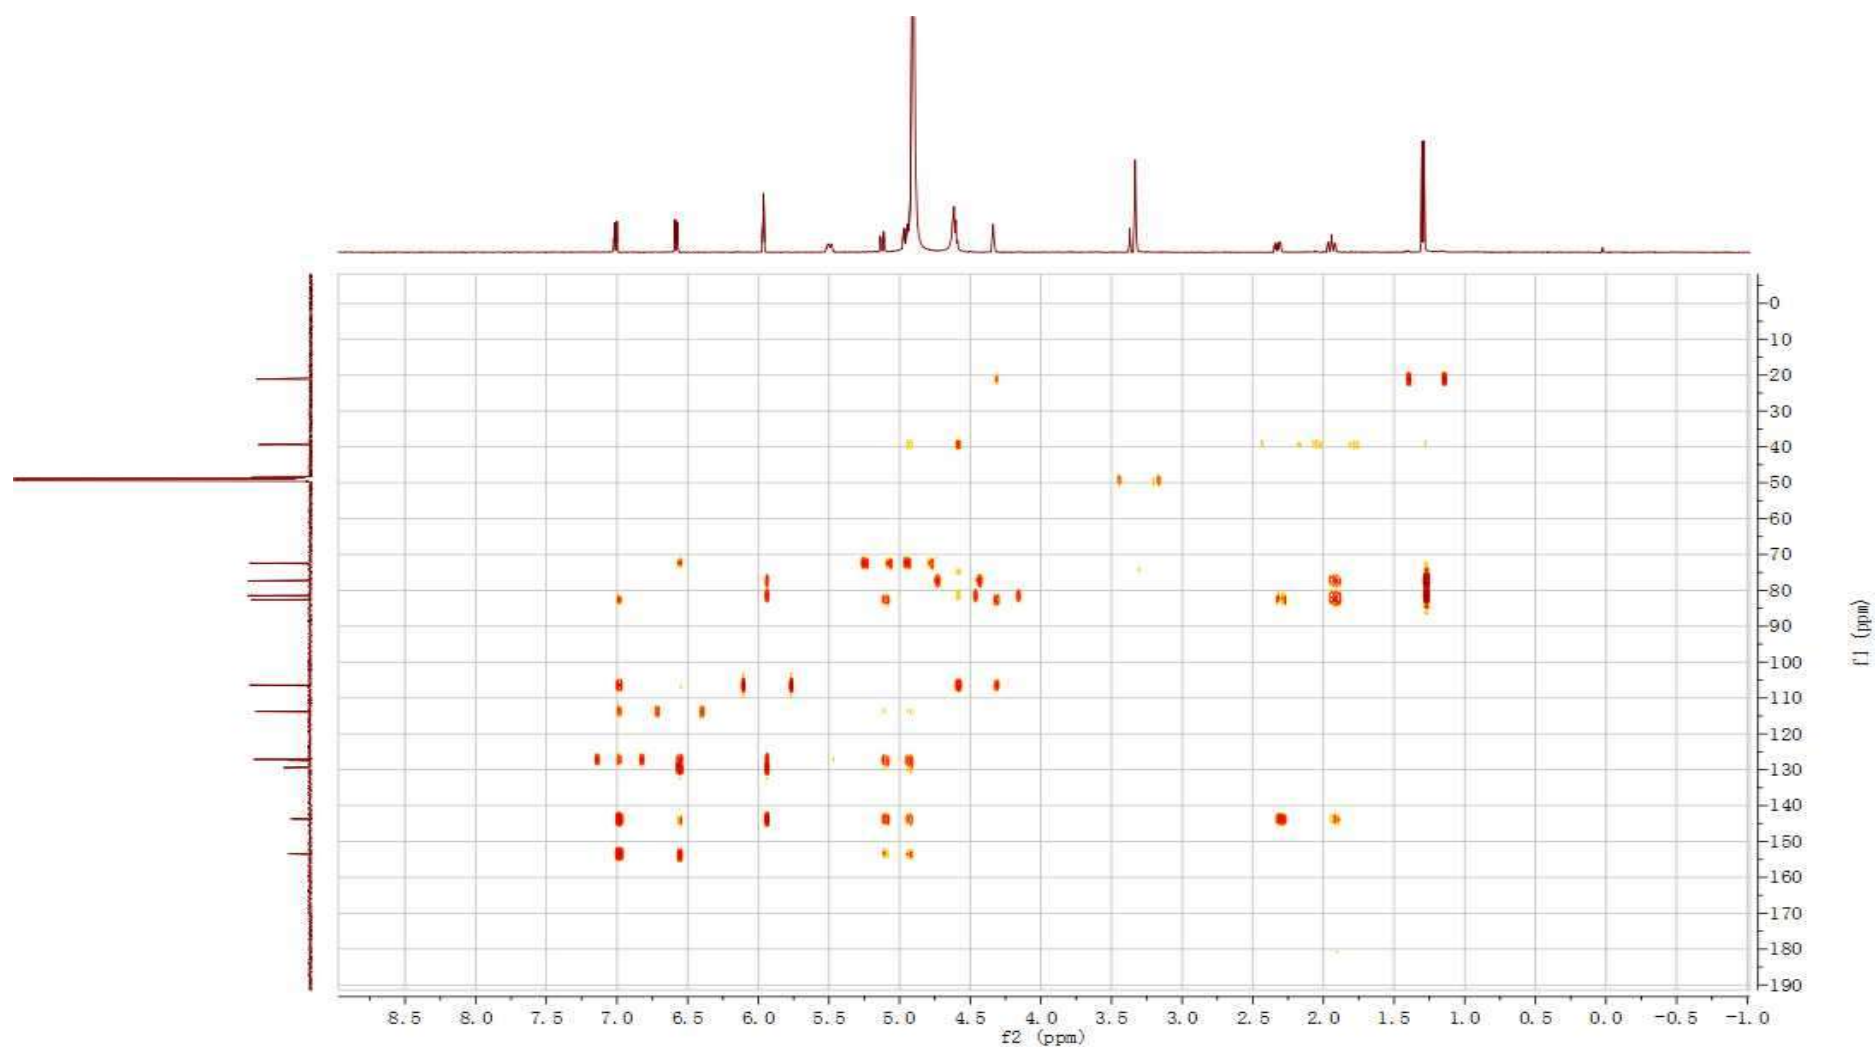

Figure S5. HMBC spectrum of the new compound **1**

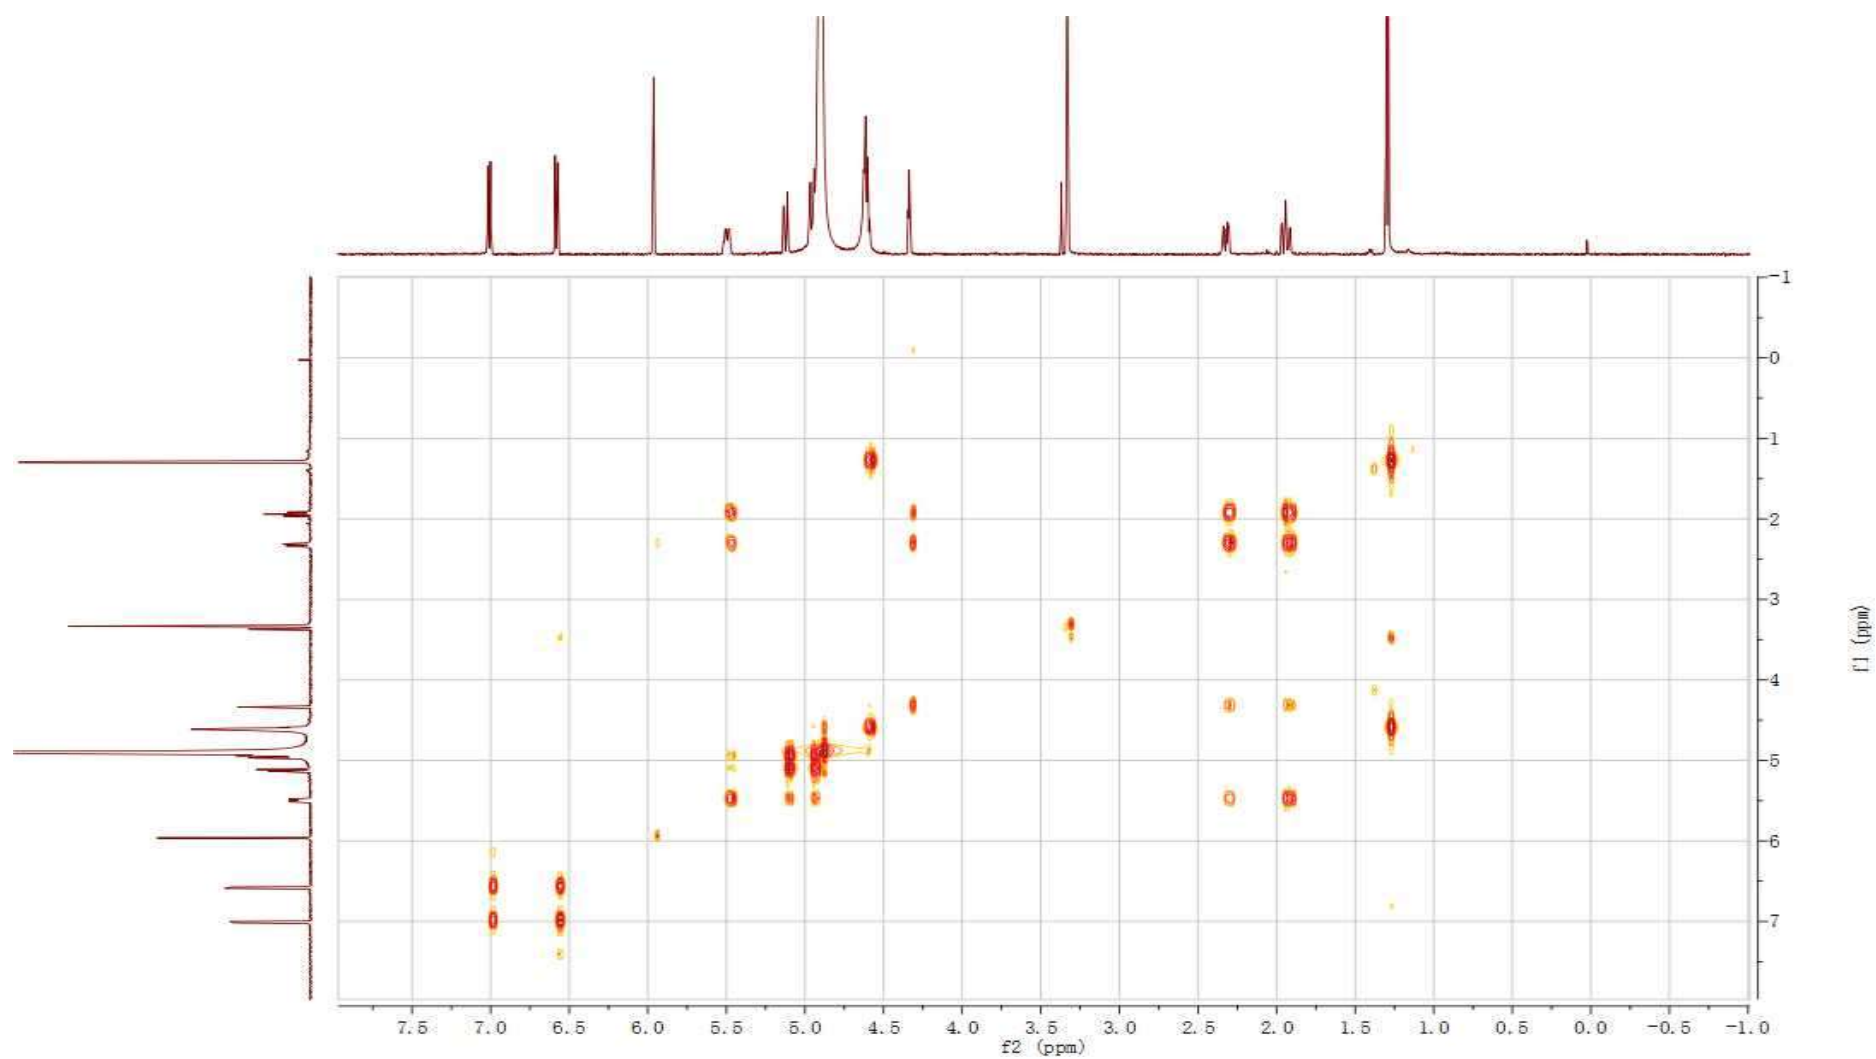

Figure S6. COSY spectrum of the new compound **1**

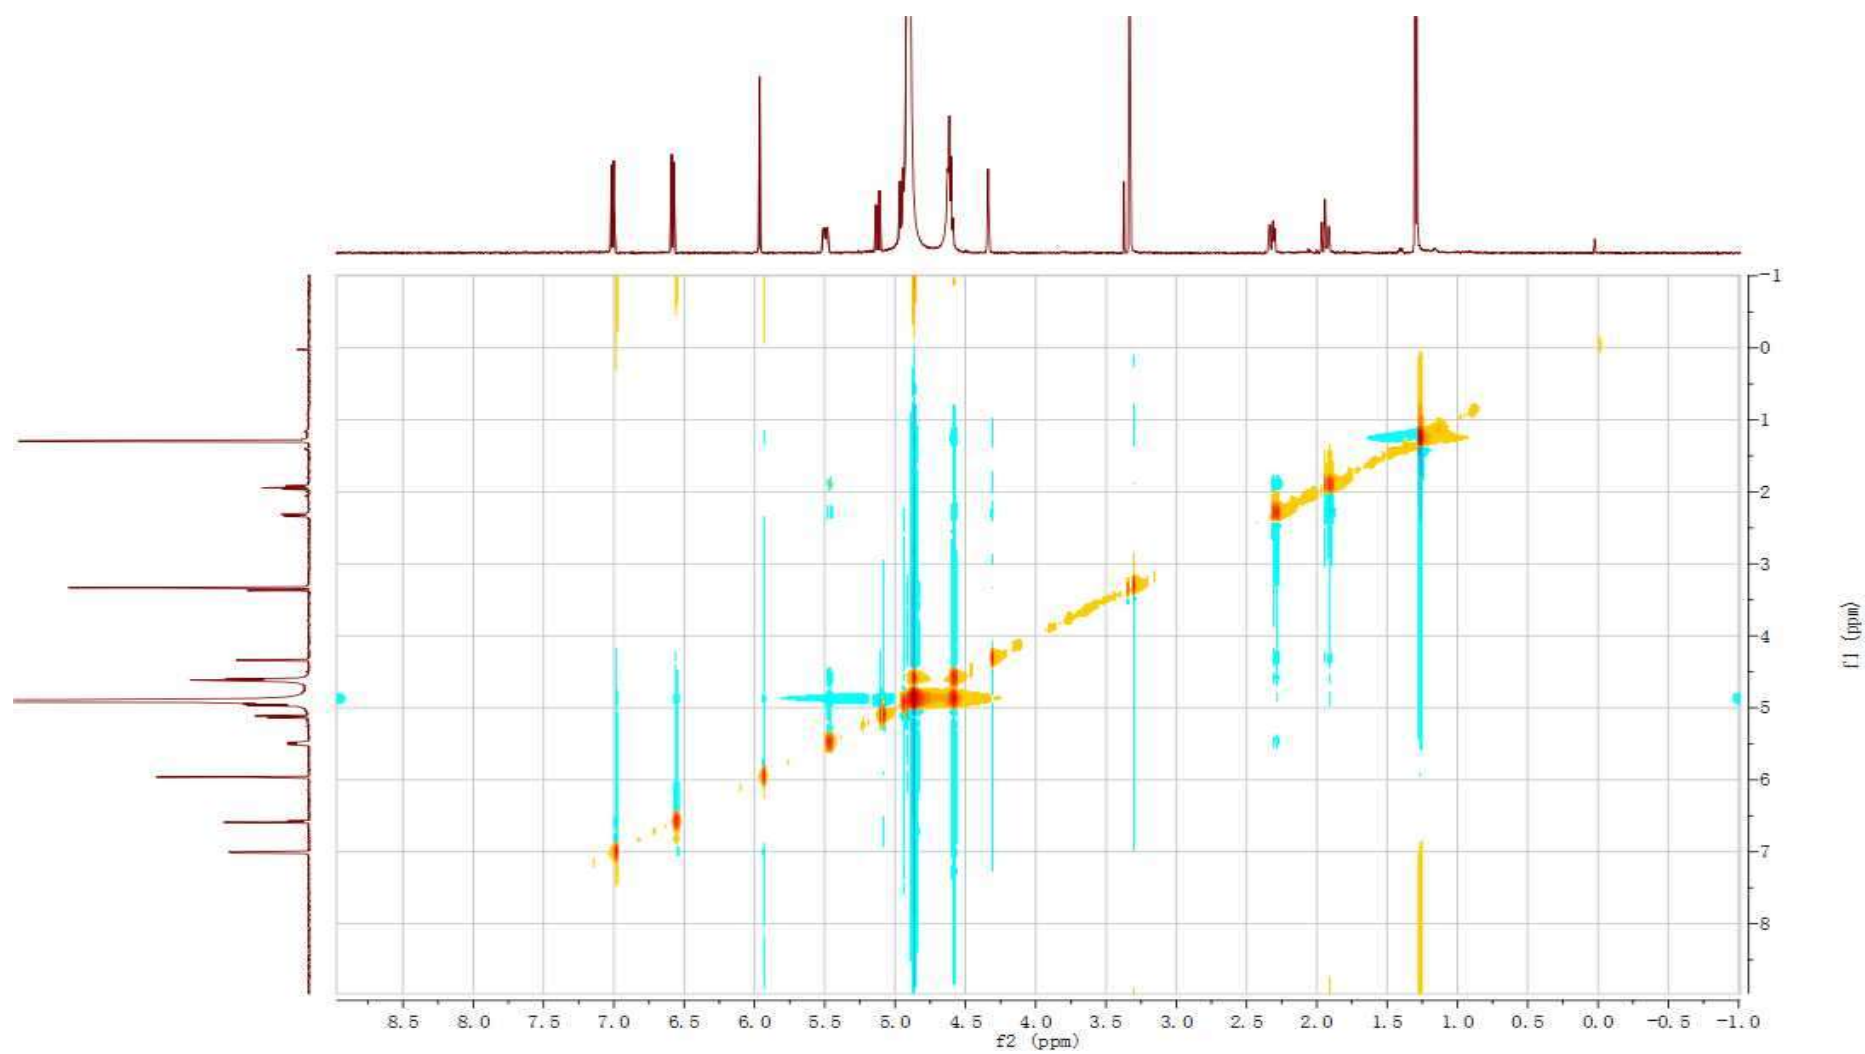

Figure S7. NOESY spectrum of the new compound **1**

# HR-ESI-MS-NEG

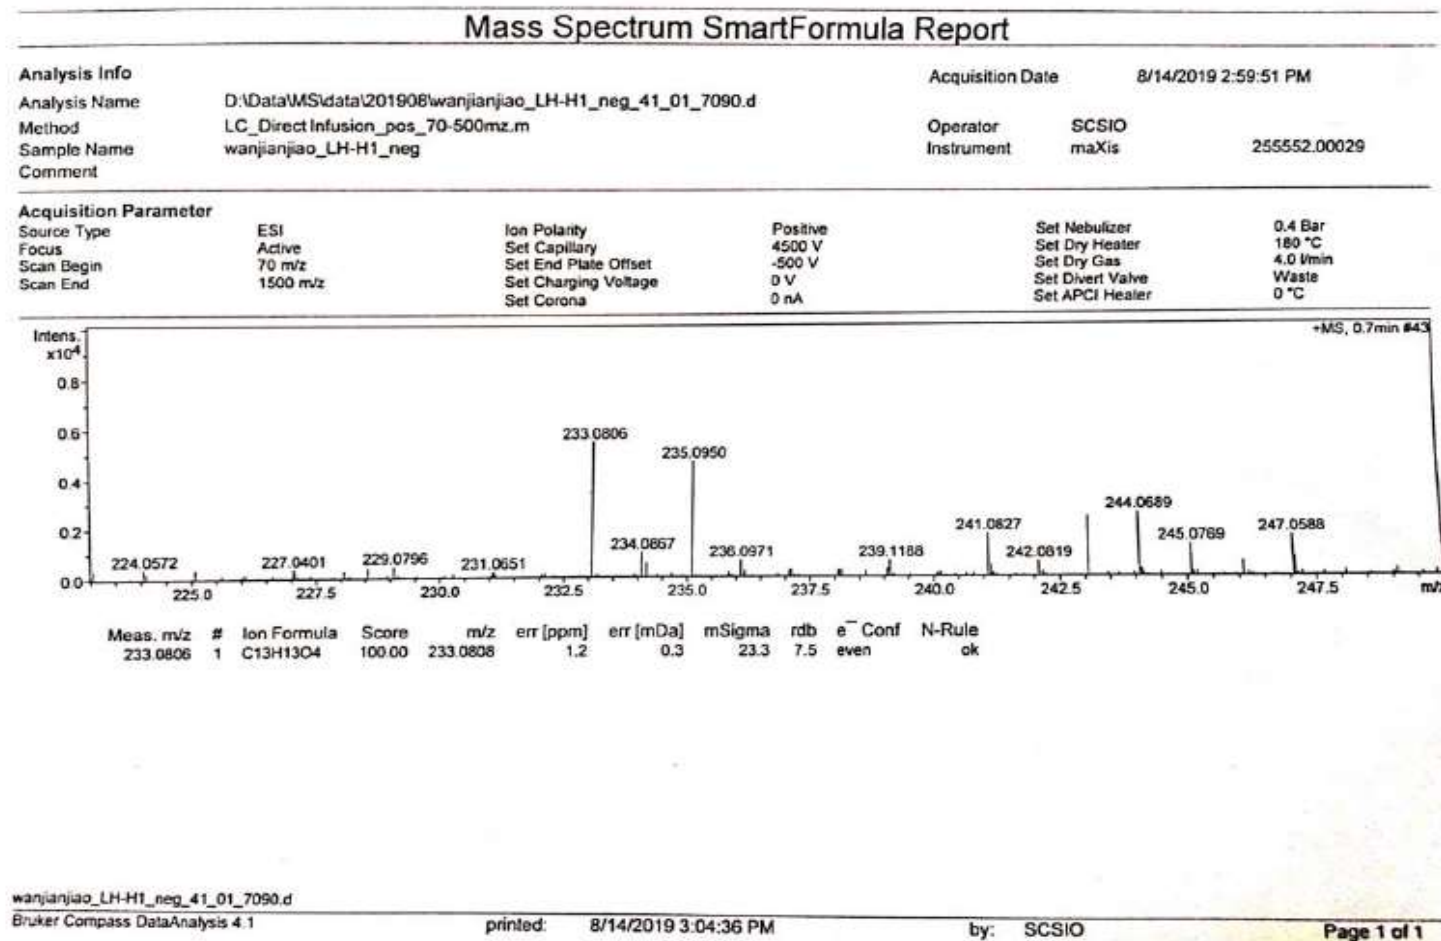

Figure S8. HRESI-MS spectrum of the new compound **2**

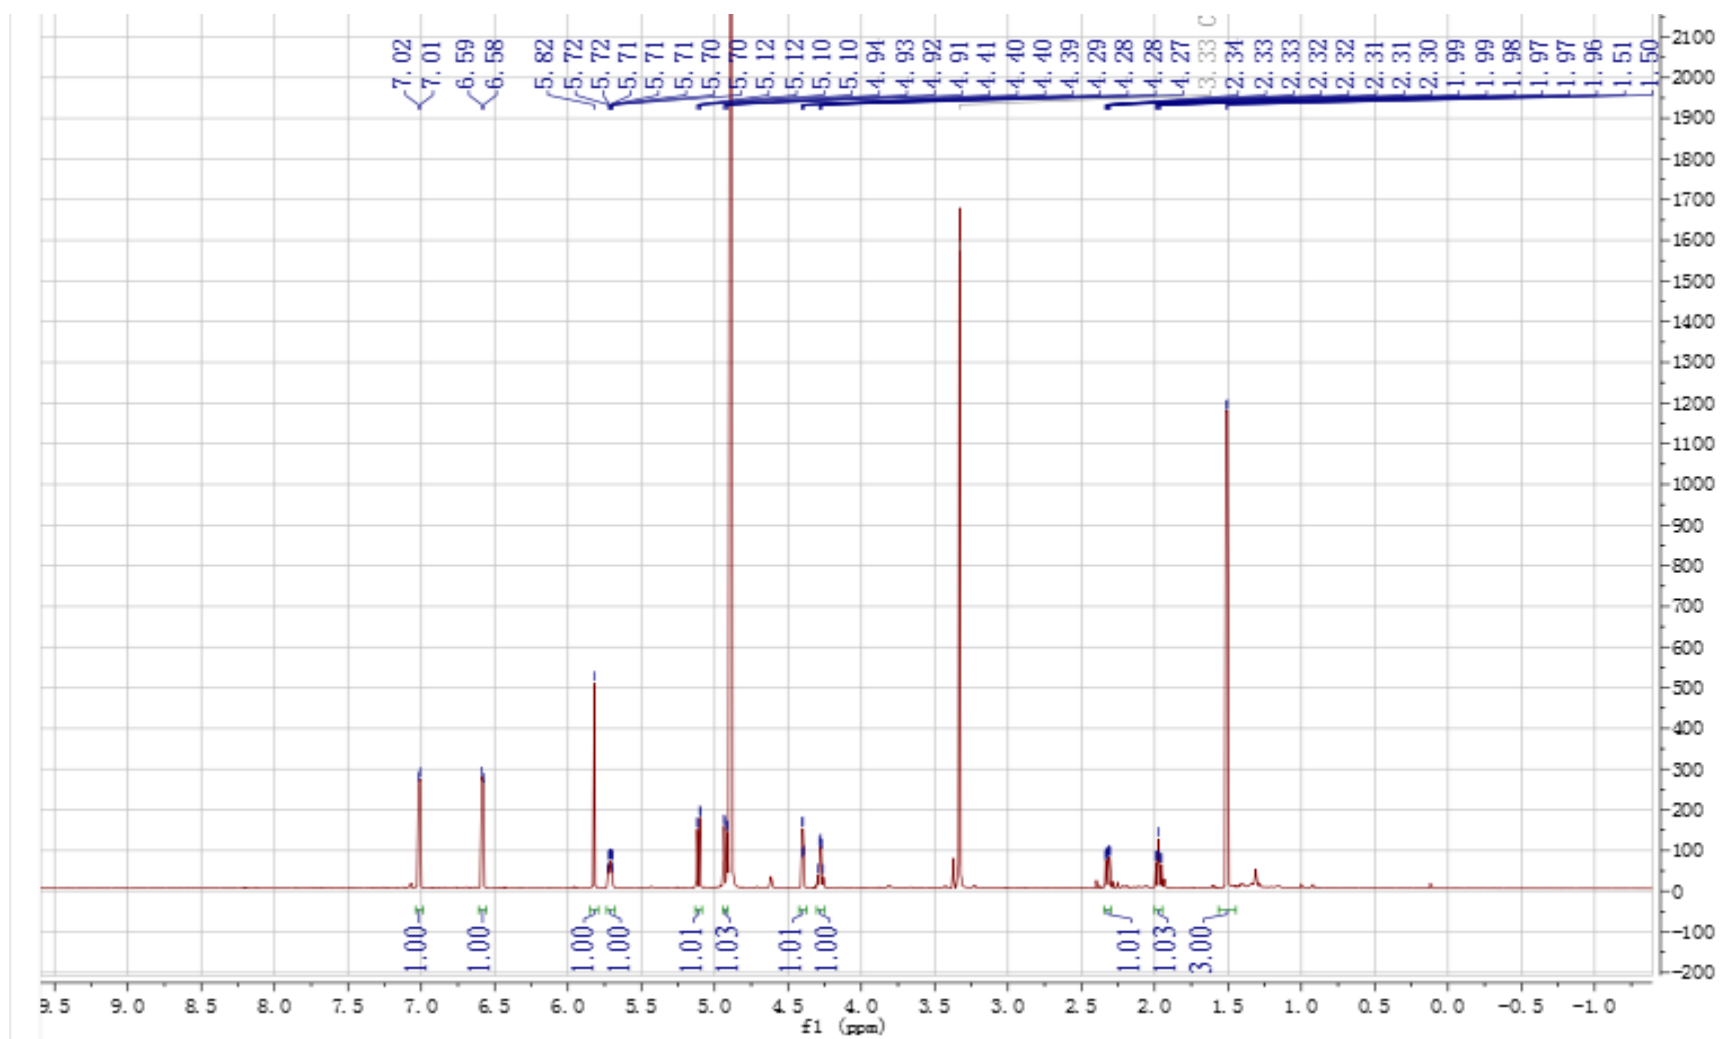

Figure S9.  $^1\text{H}$  NMR (500 MHz,  $\text{CD}_3\text{OD}$ ) spectrum of the new compound **2**

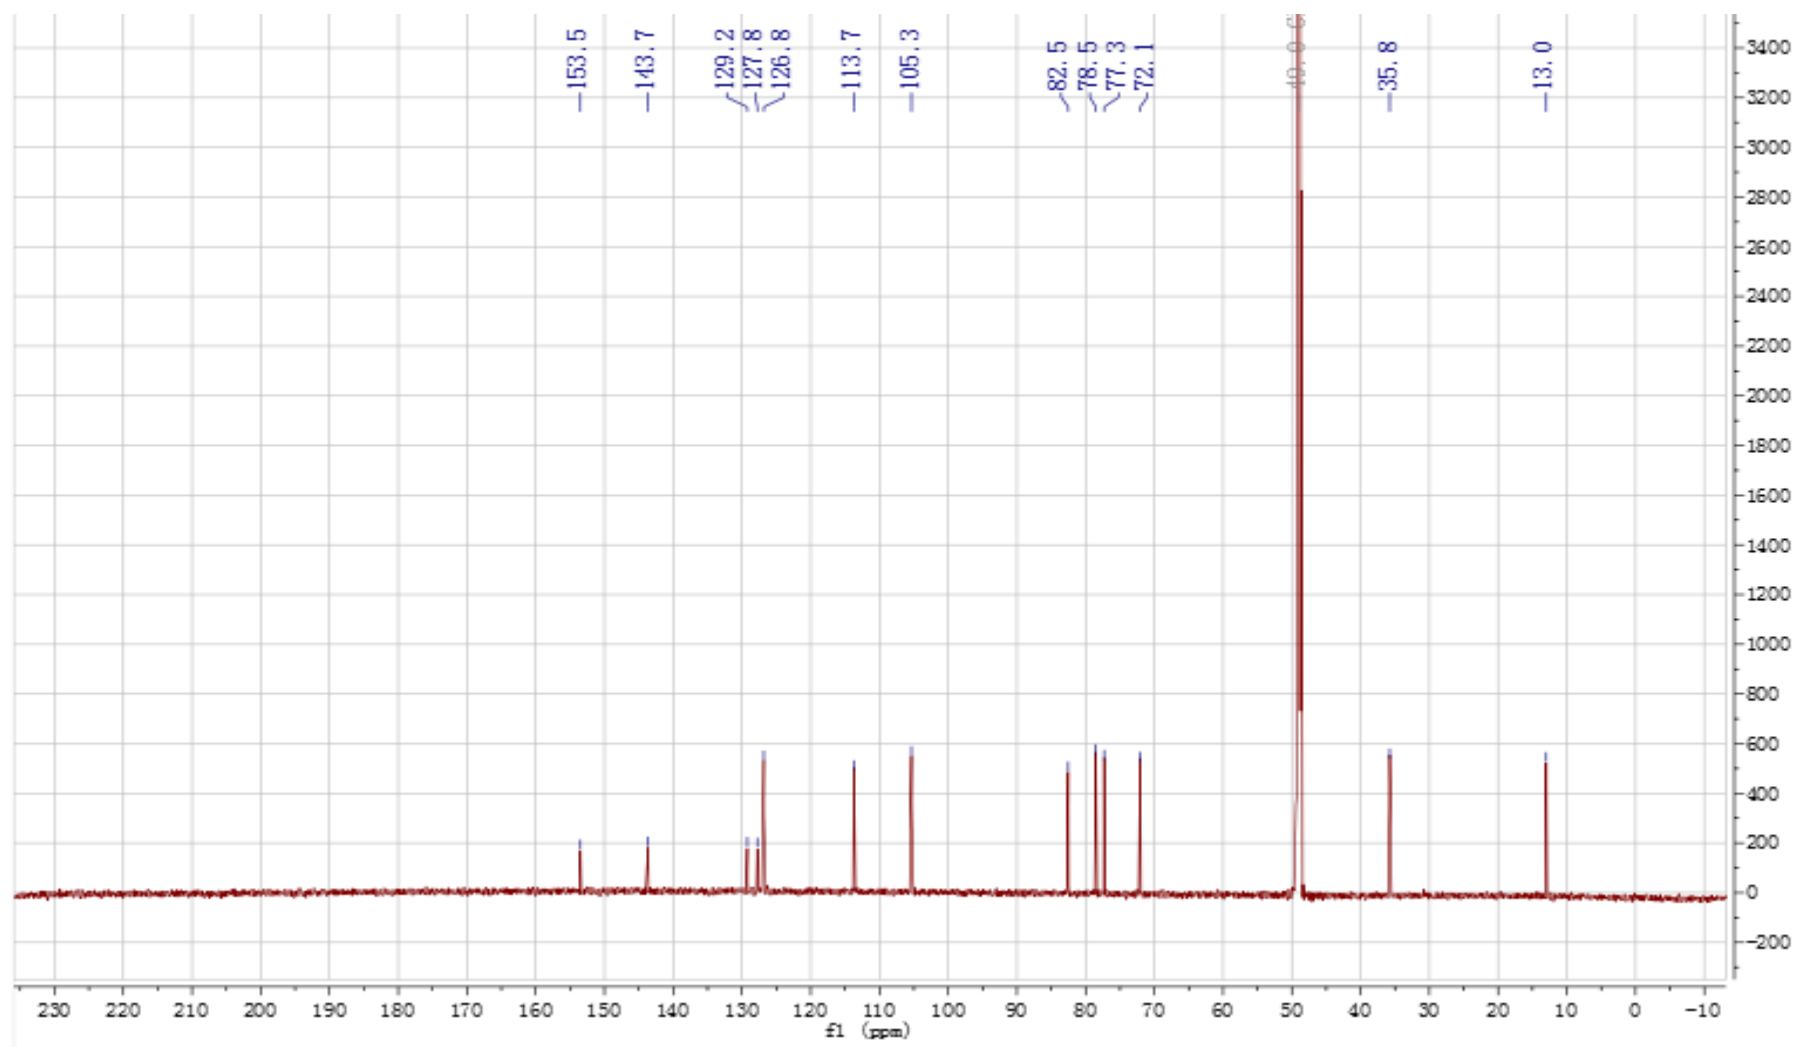

Figure S10. <sup>13</sup>C NMR (125 MHz, CD<sub>3</sub>OD) spectrum of the newcompound **2**

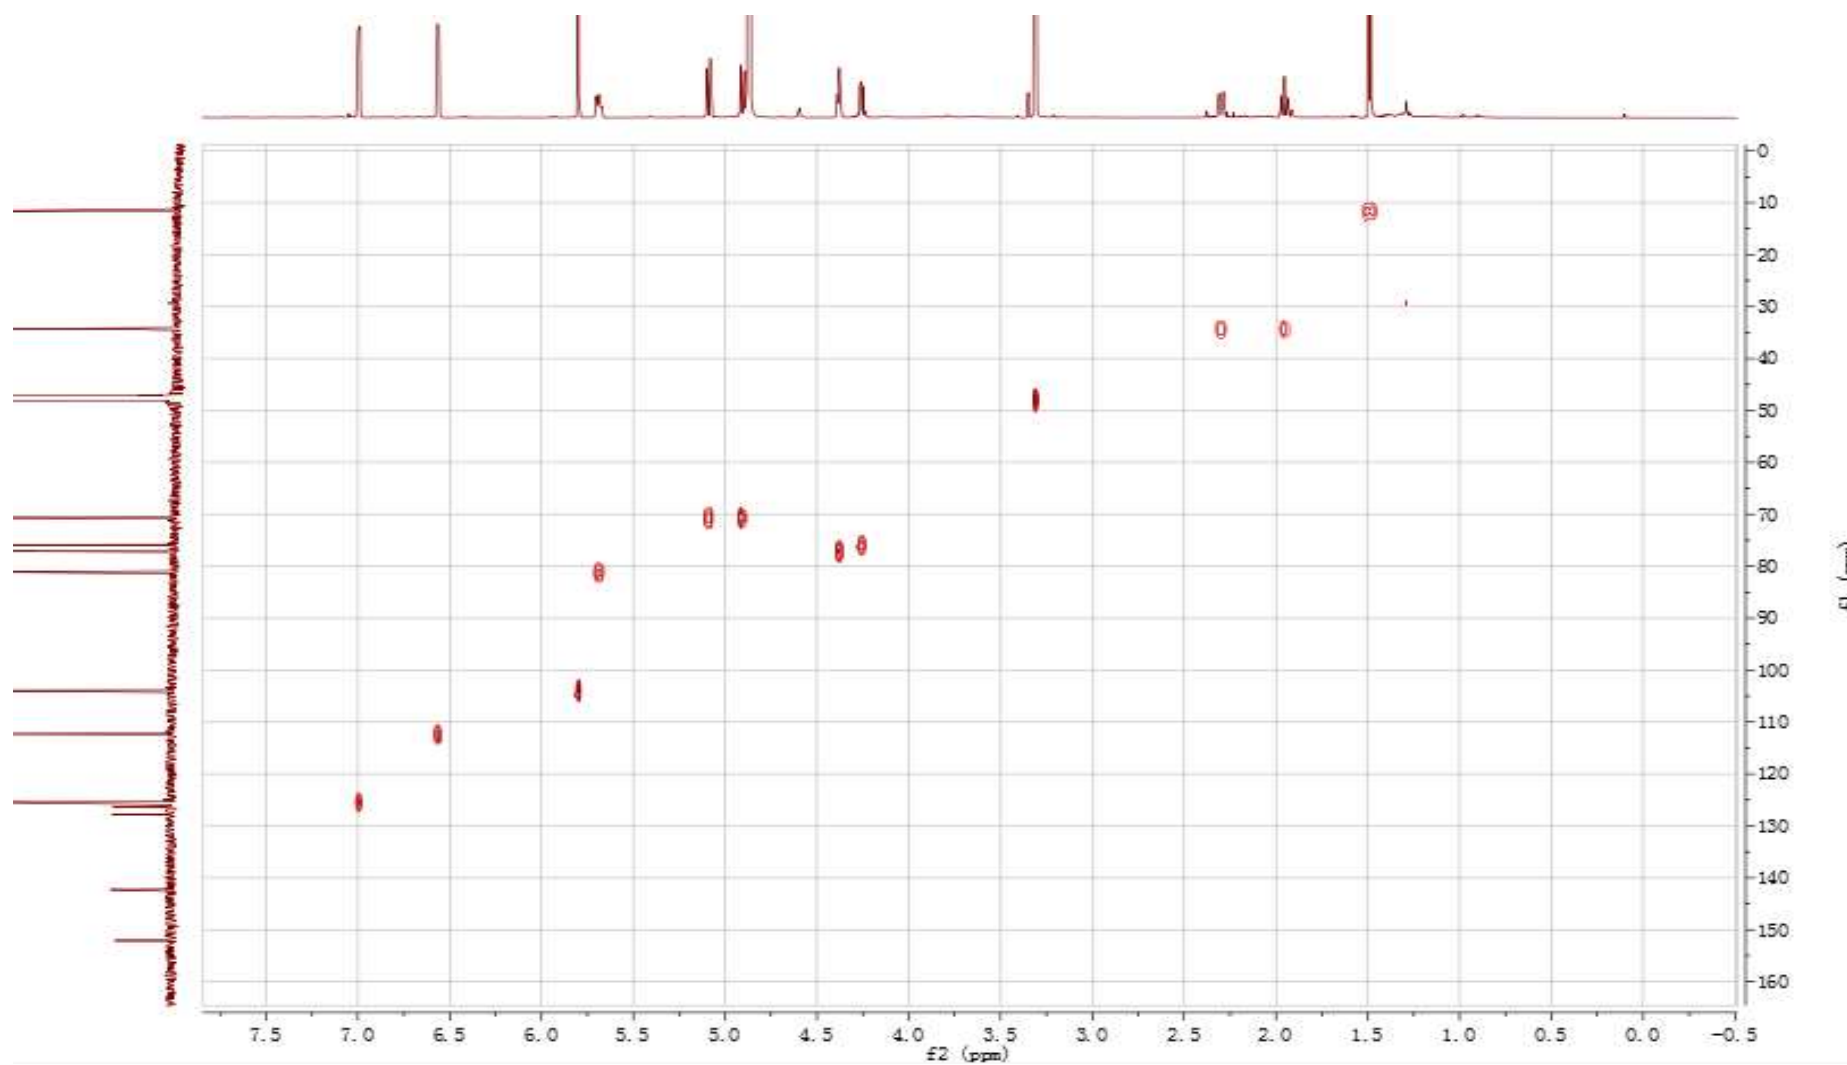

Figure S11. HSQC spectrum of the new compound **2**

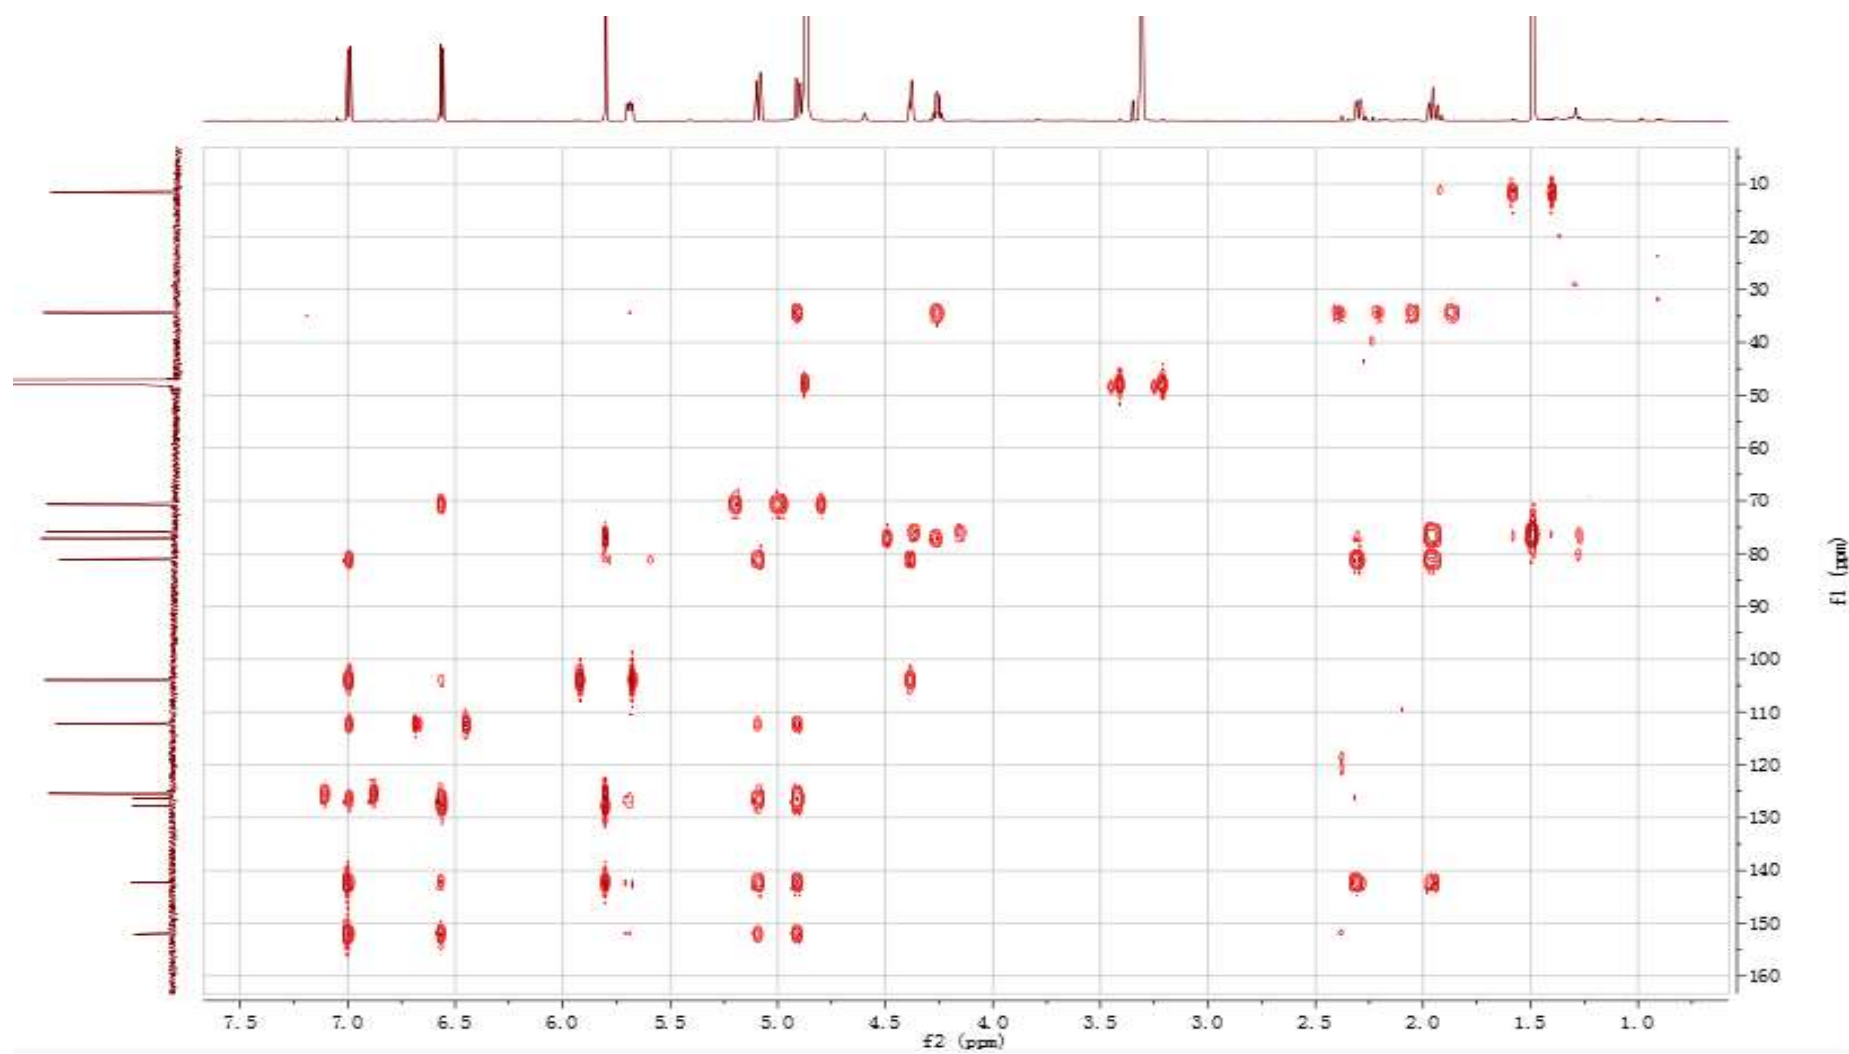

Figure S12. HMBC spectrum of the new compound **2**

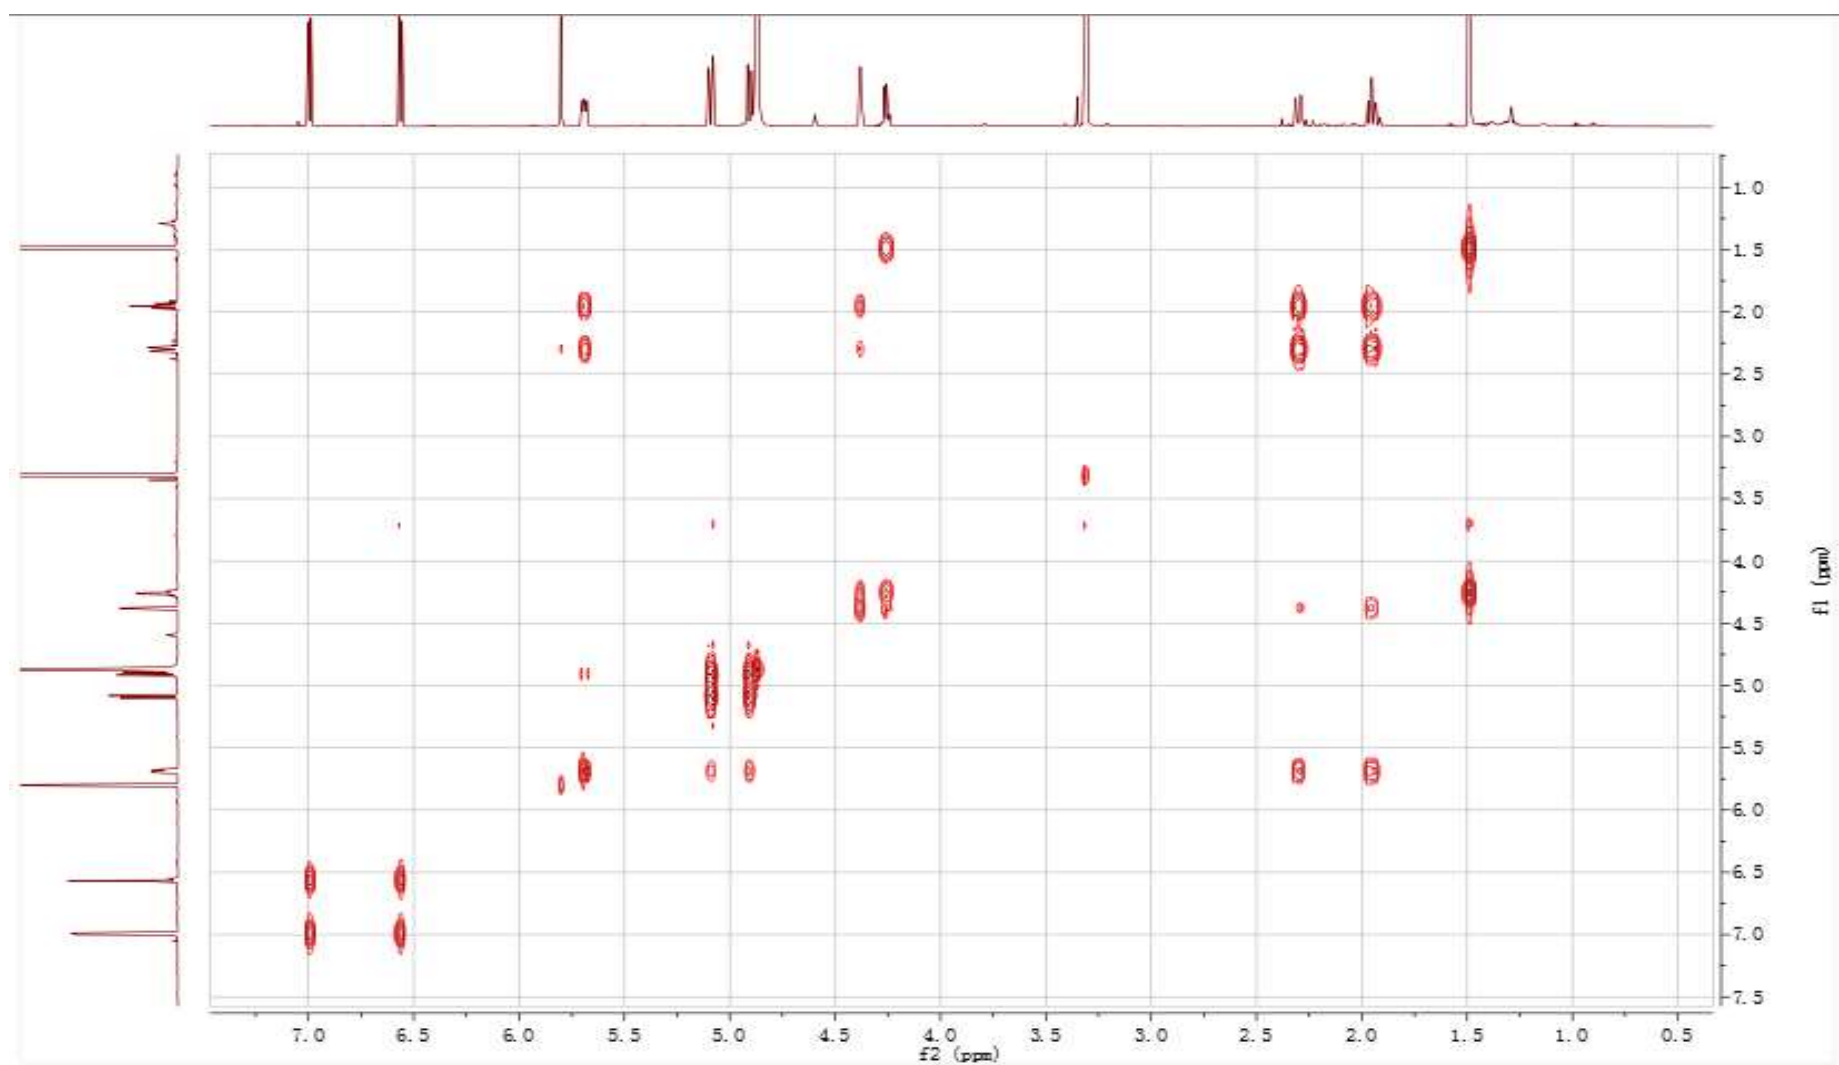

Figure S13. COSY spectrum of the new compound **2**

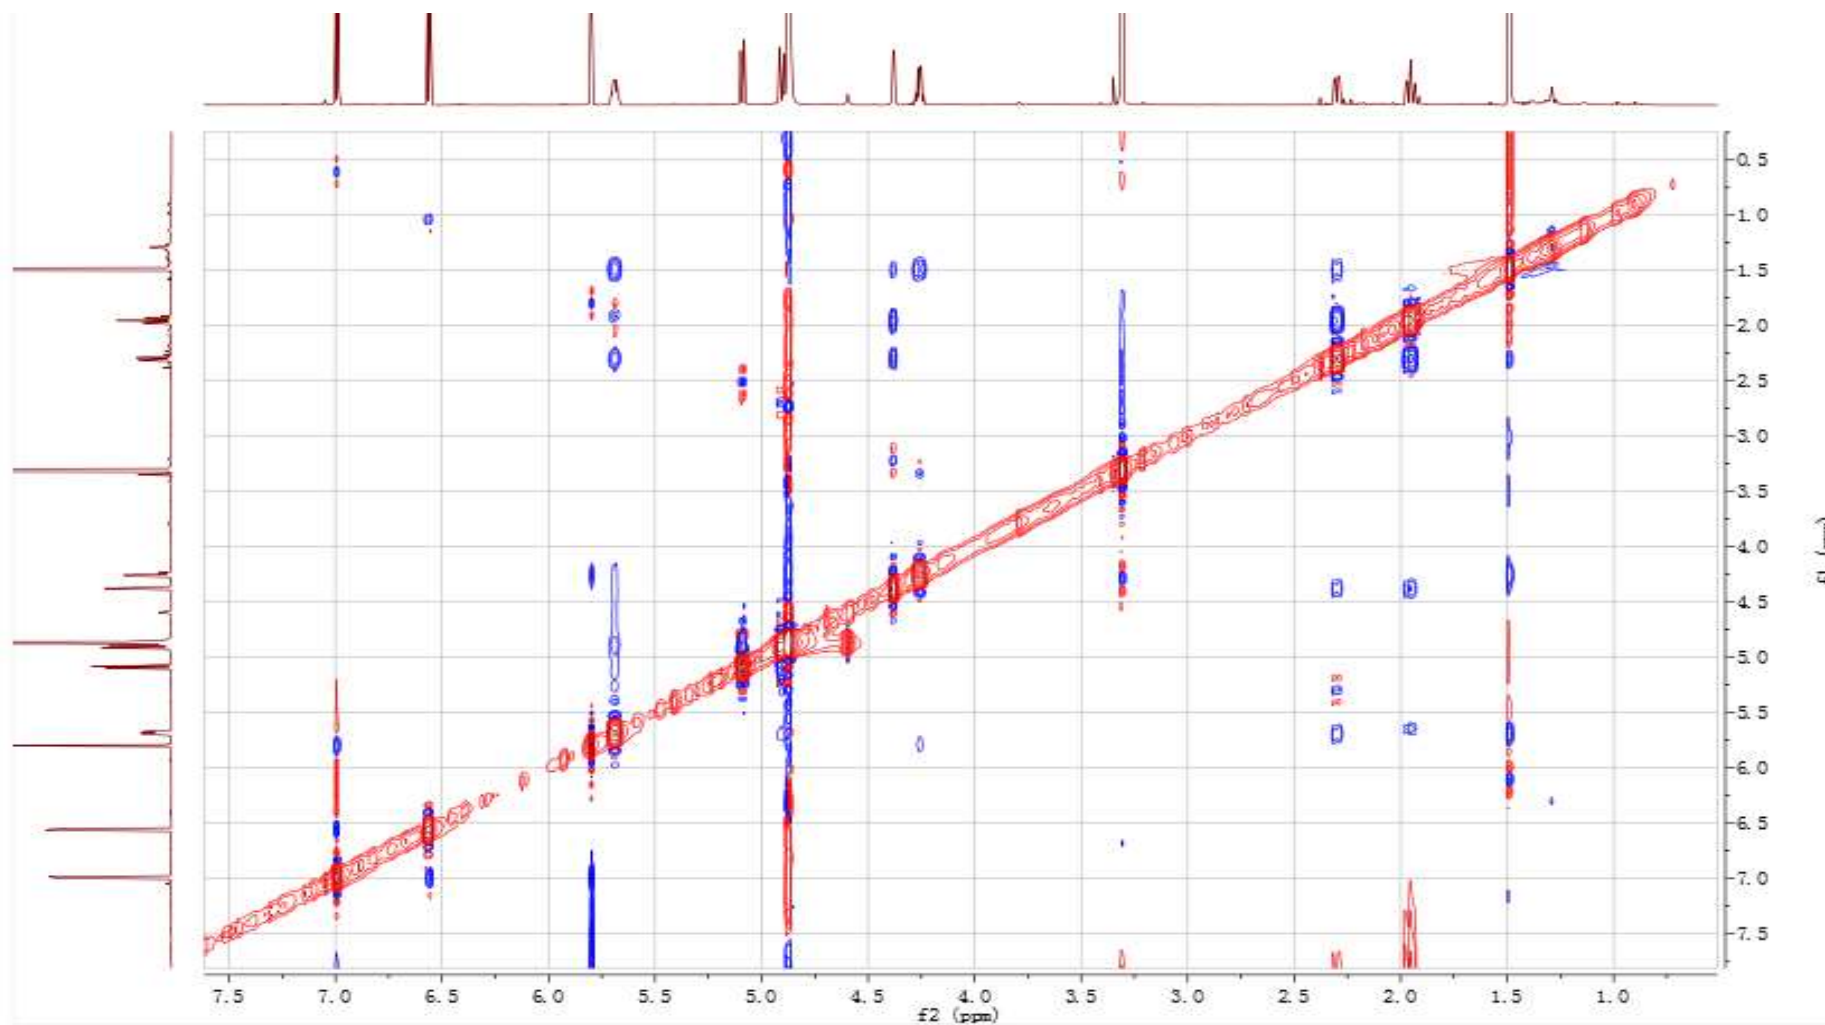

Figure S14. NOESY spectrum of the new compound **2**

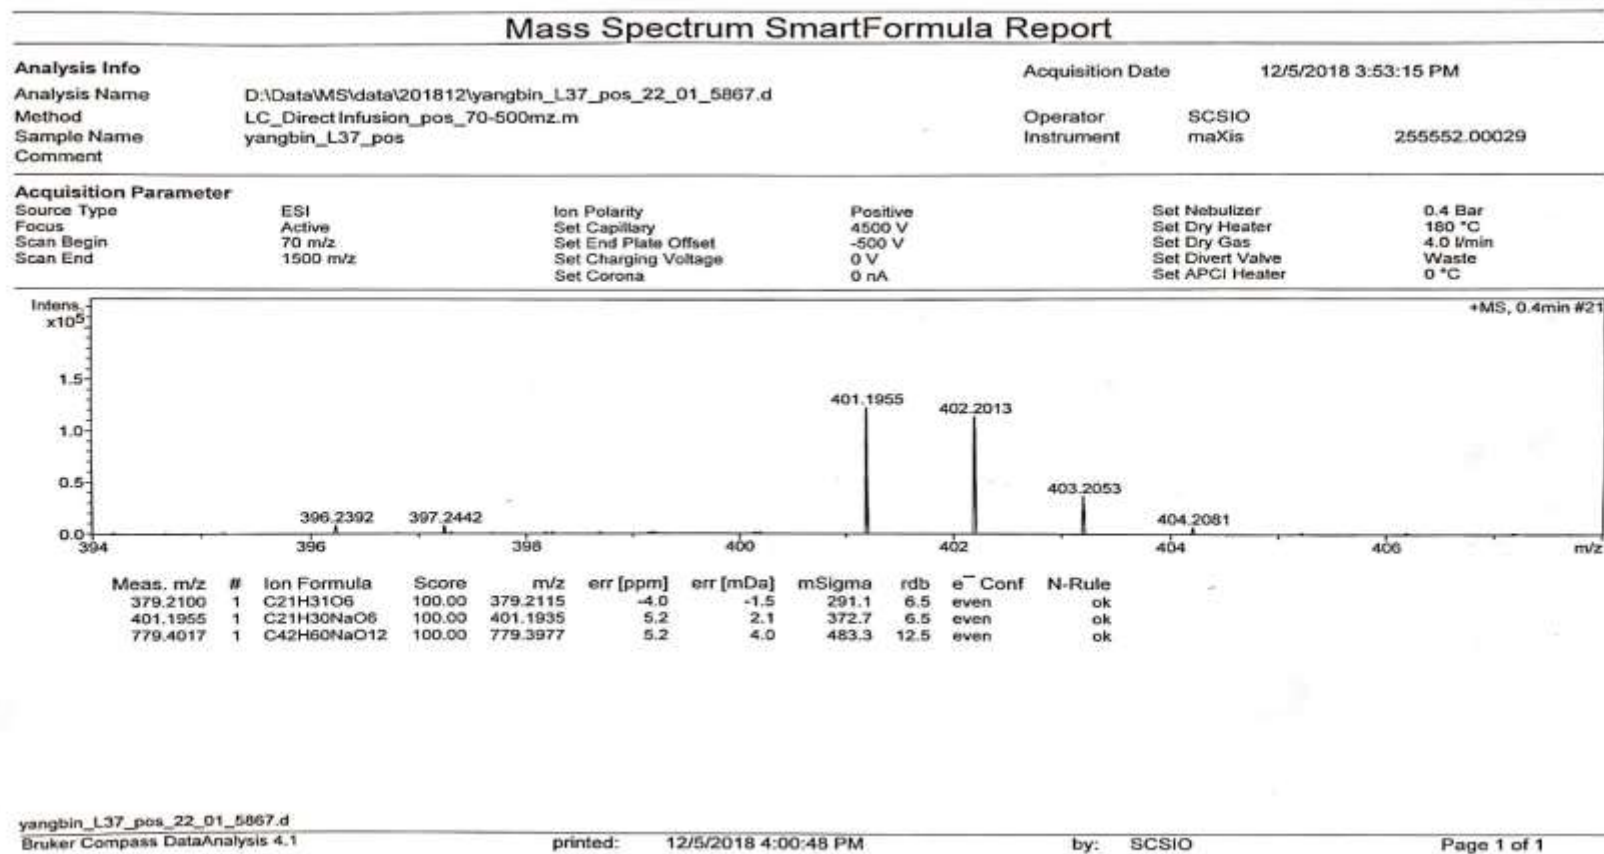

Figure S15. HRESI-MS spectrum of the new compound **3**

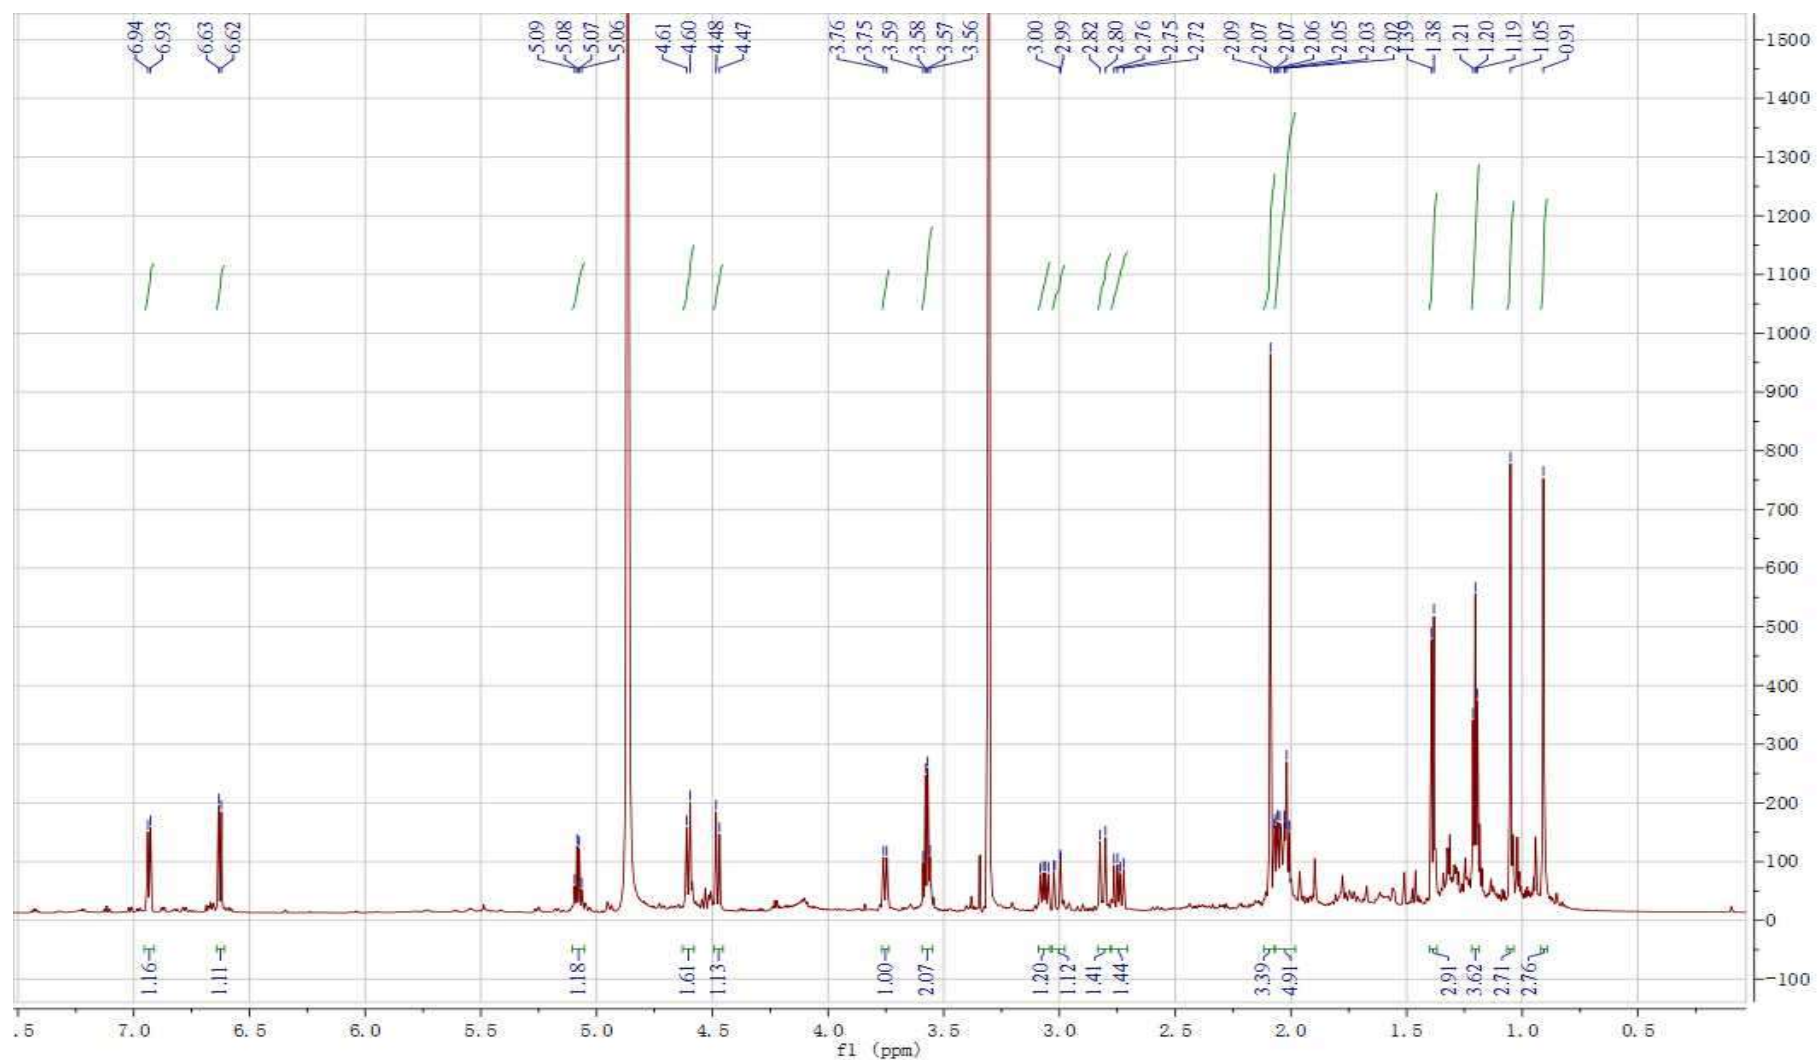

Figure S16.  $^1\text{H}$  NMR (500 MHz,  $\text{CD}_3\text{OD}$ ) spectrum of the new compound **3**

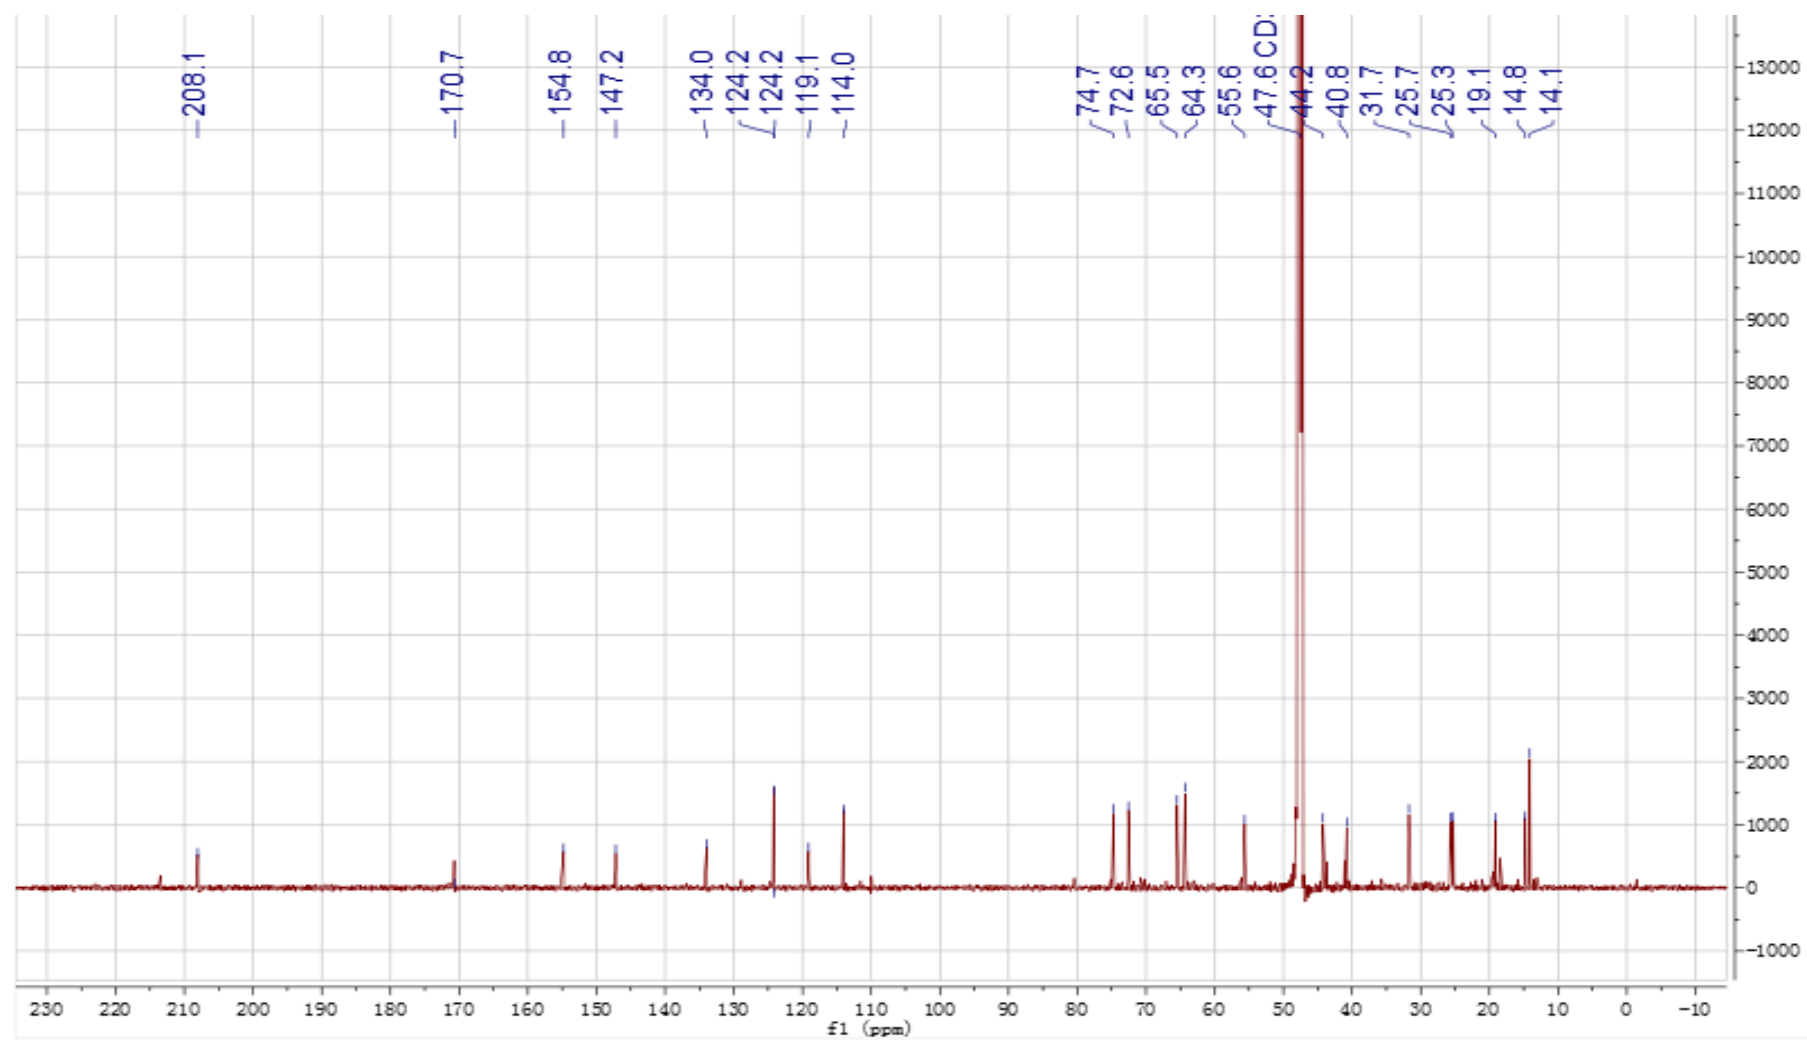

Figure S17. <sup>13</sup>C NMR (125 MHz, CD<sub>3</sub>OD) spectrum of the new compound **3**

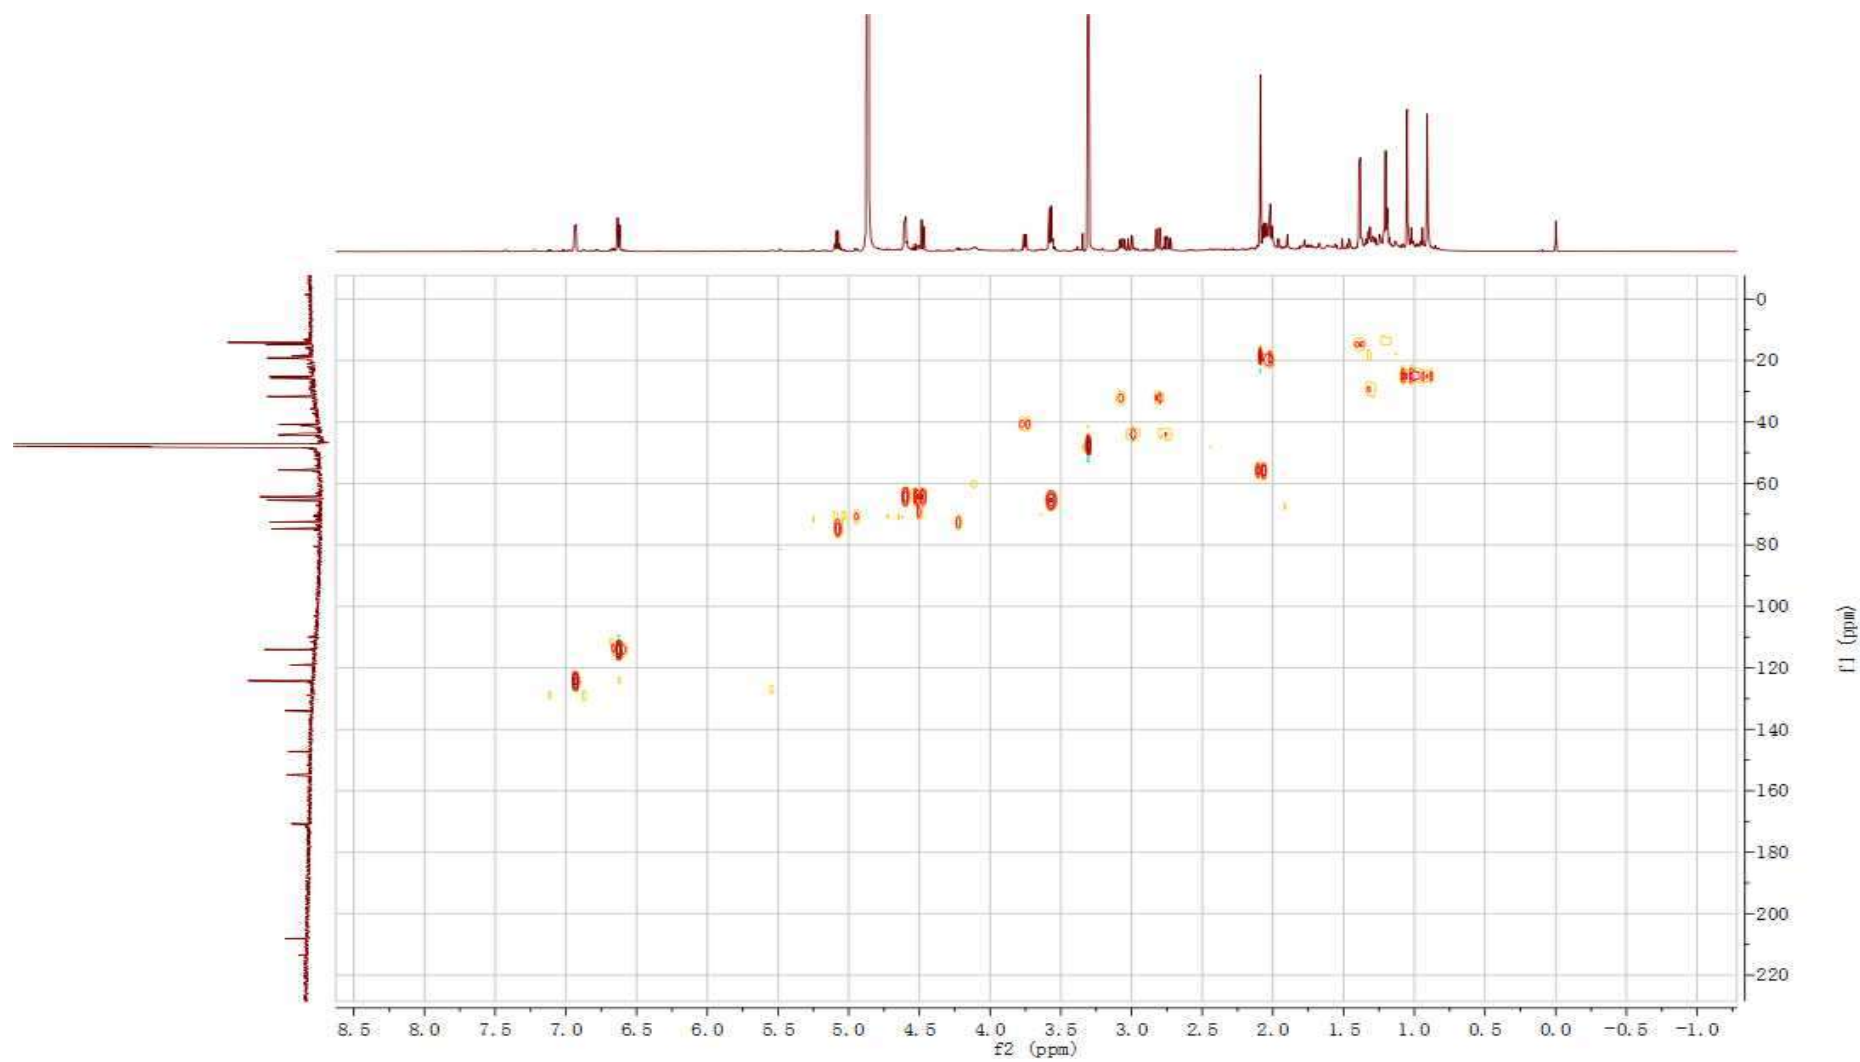

Figure S18. HSQC spectrum of the new compound **3**

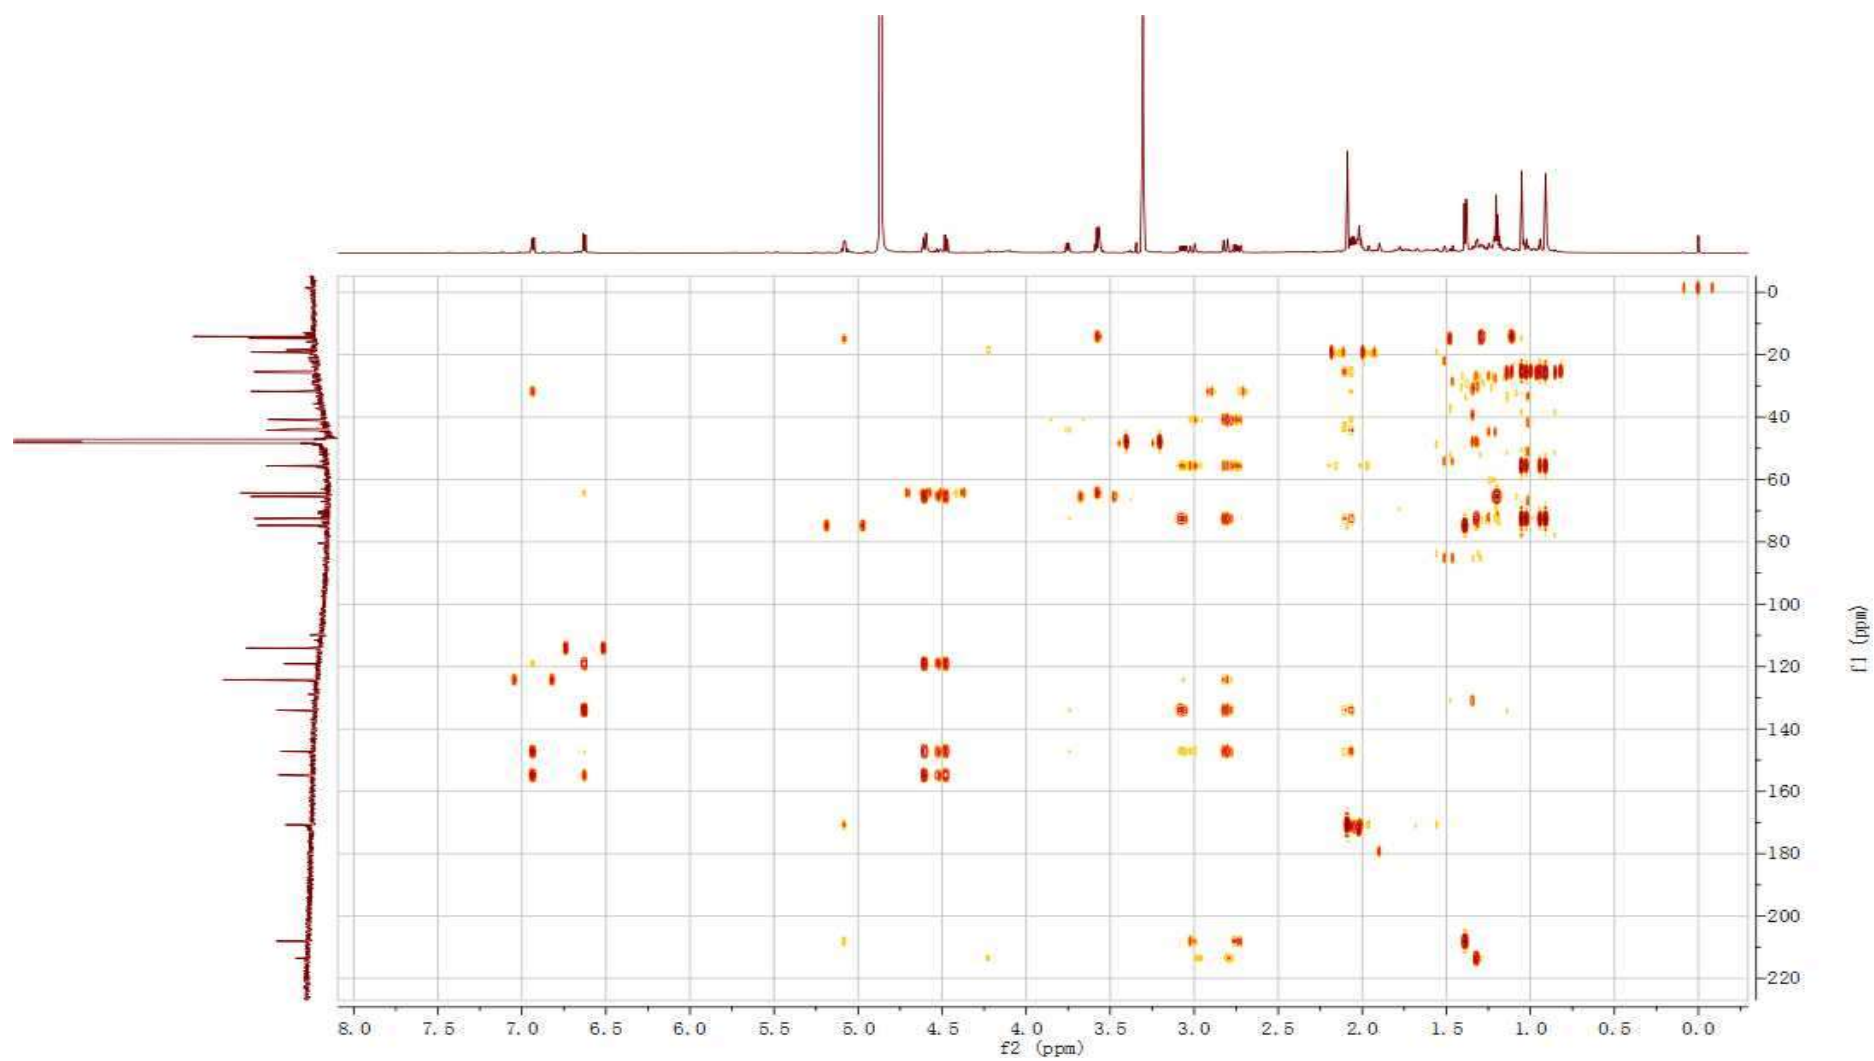

Figure S19. HMBC spectrum of the new compound **3**

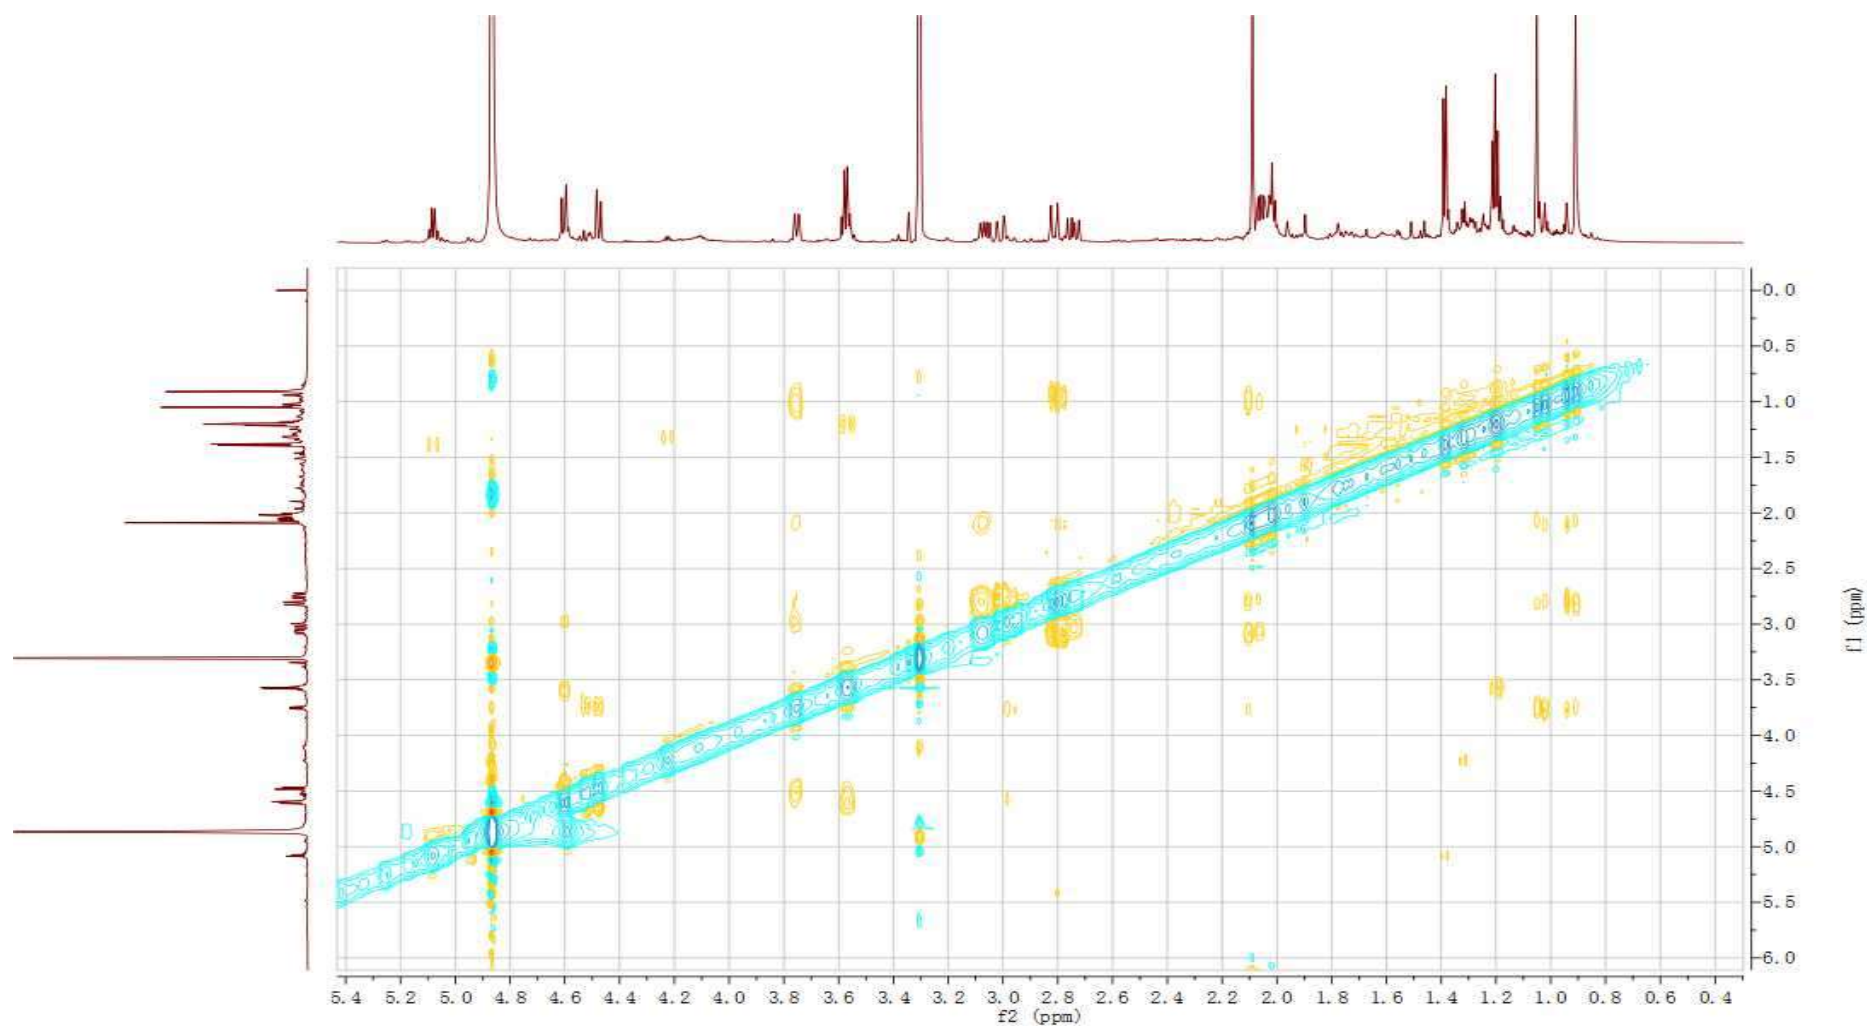

Figure S20. NOESY spectrum of the new compound **3**

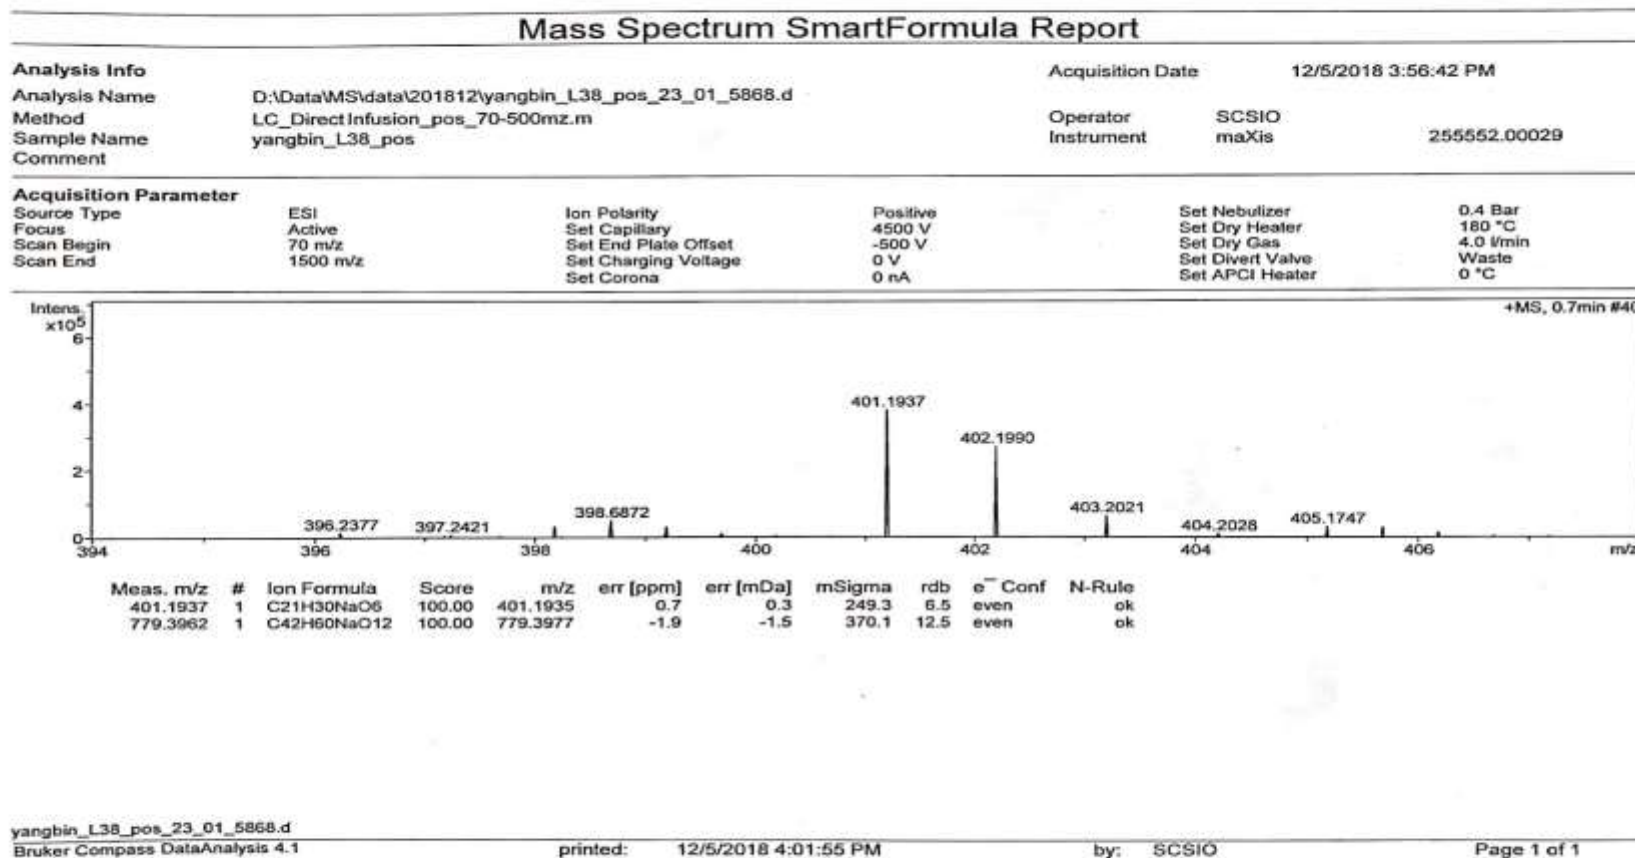

Figure S21. HRESI-MS spectrum of the new compound **4**

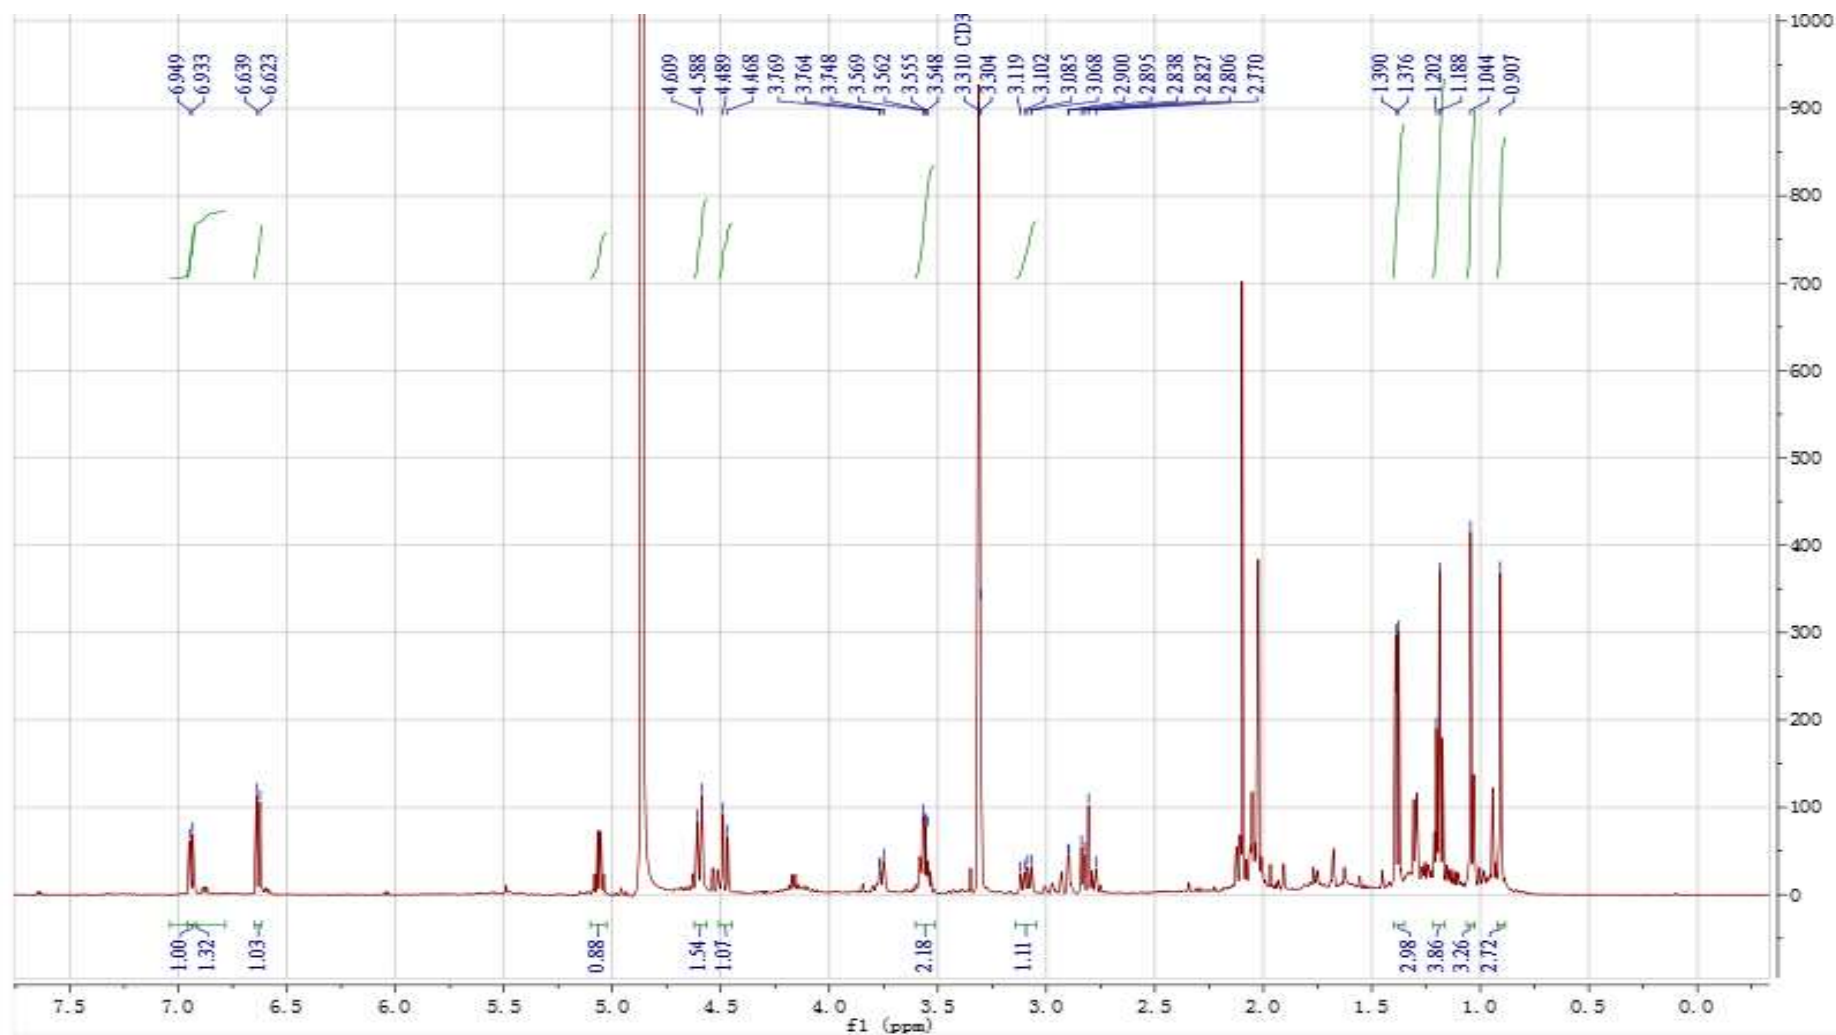

Figure S22.  $^1\text{H}$  NMR (500 MHz,  $\text{CD}_3\text{OD}$ ) spectrum of the new compound **4**

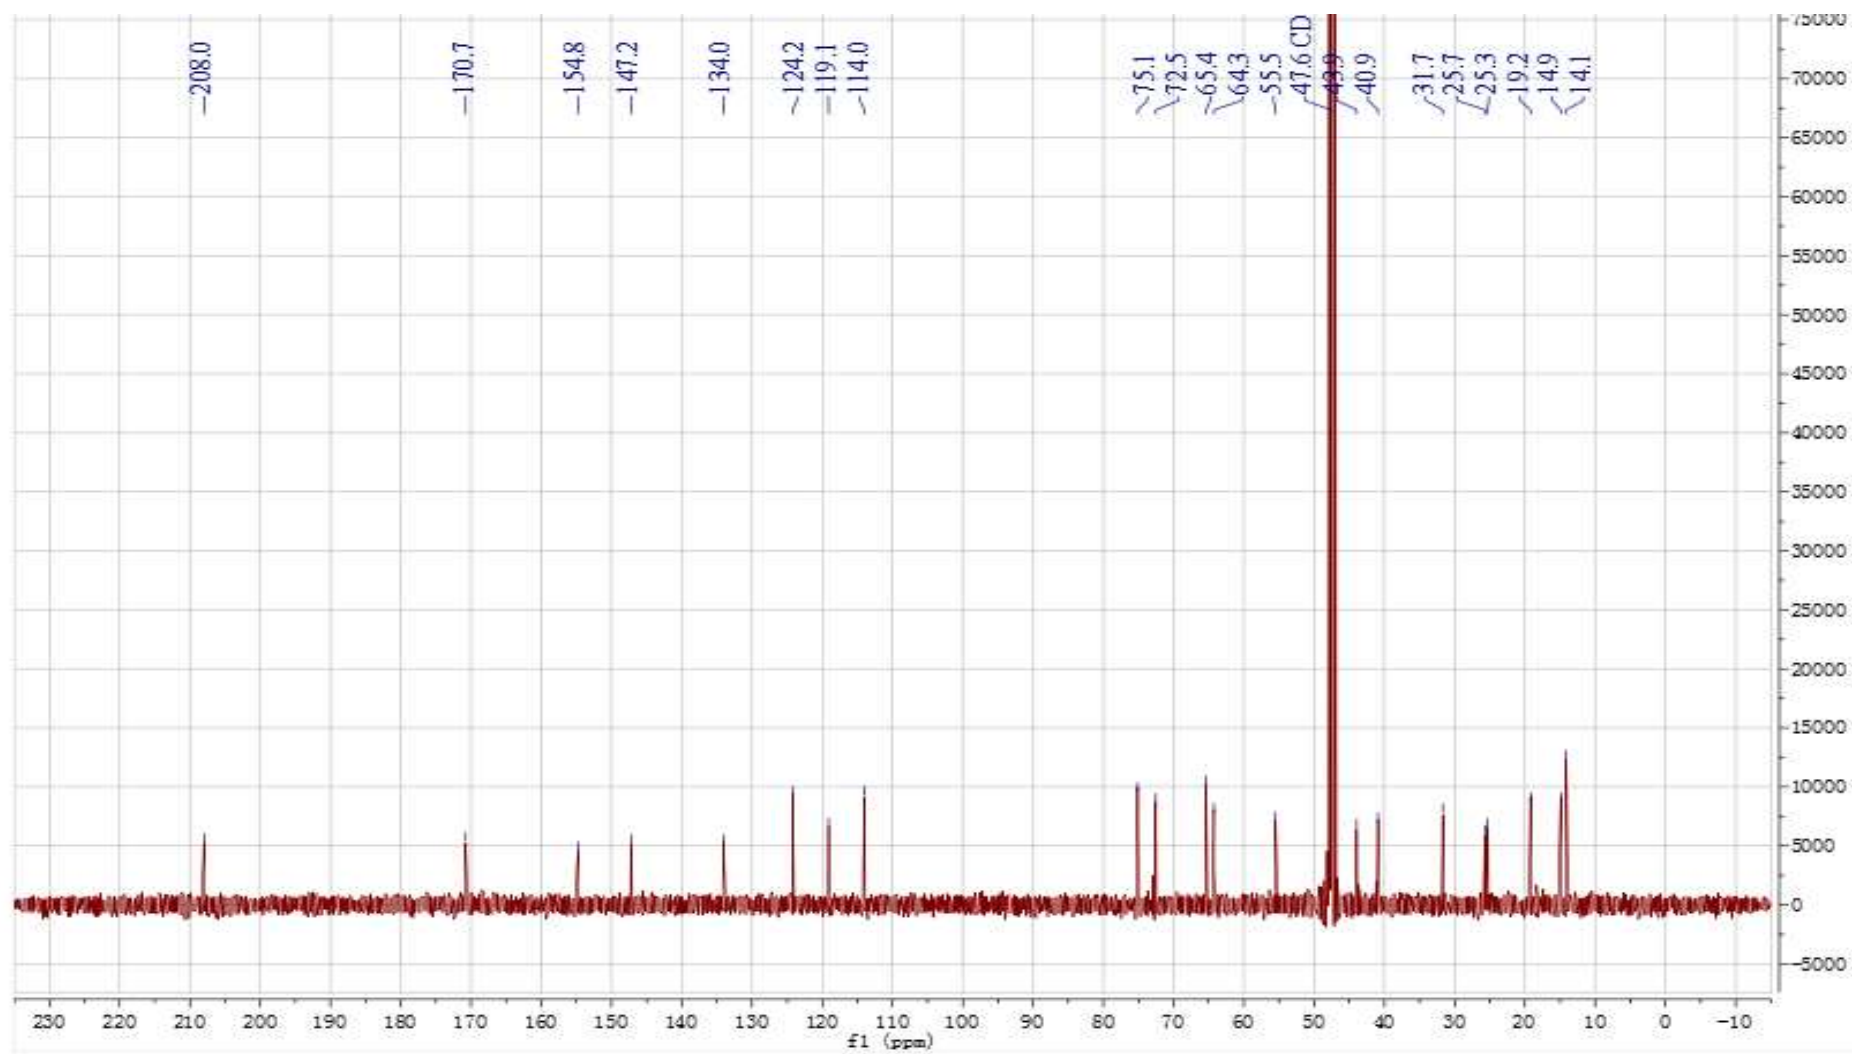

Figure S23.  $^{13}\text{C}$  NMR (125 MHz,  $\text{CD}_3\text{OD}$ ) spectrum of the new compound 4

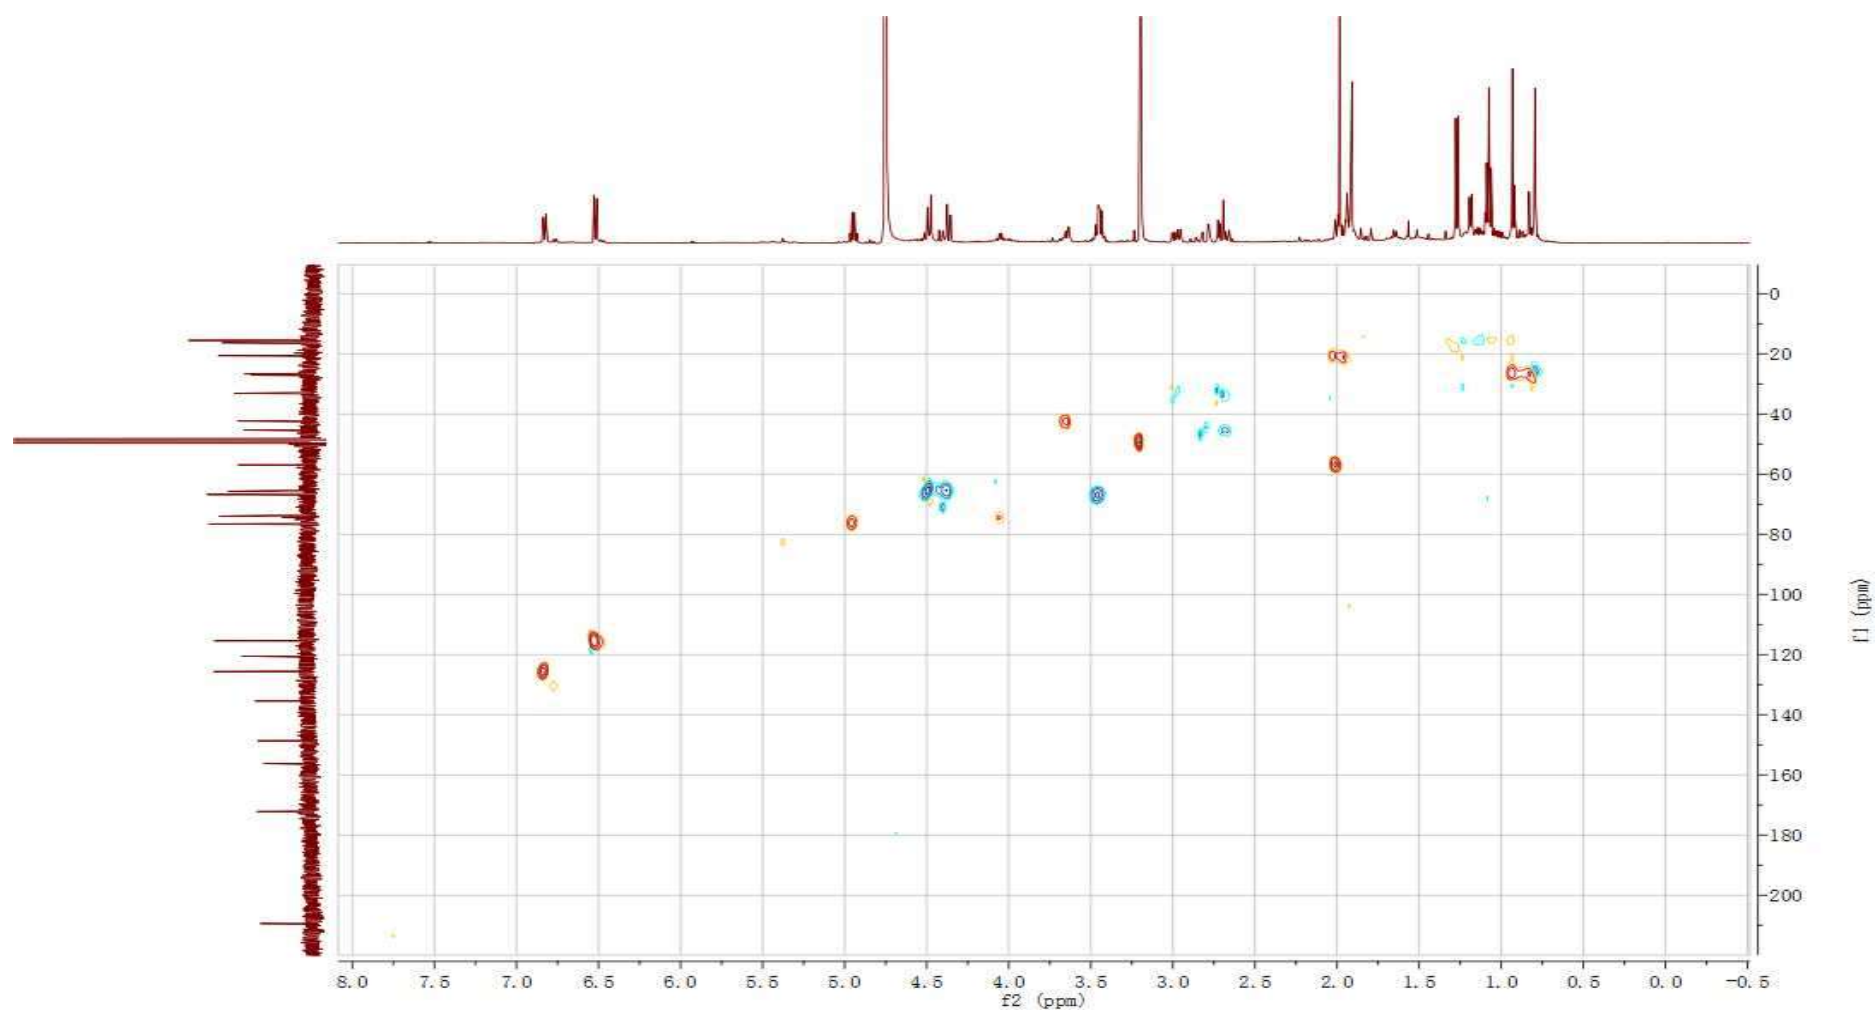

Figure S24. HSQC spectrum of the new compound **4**

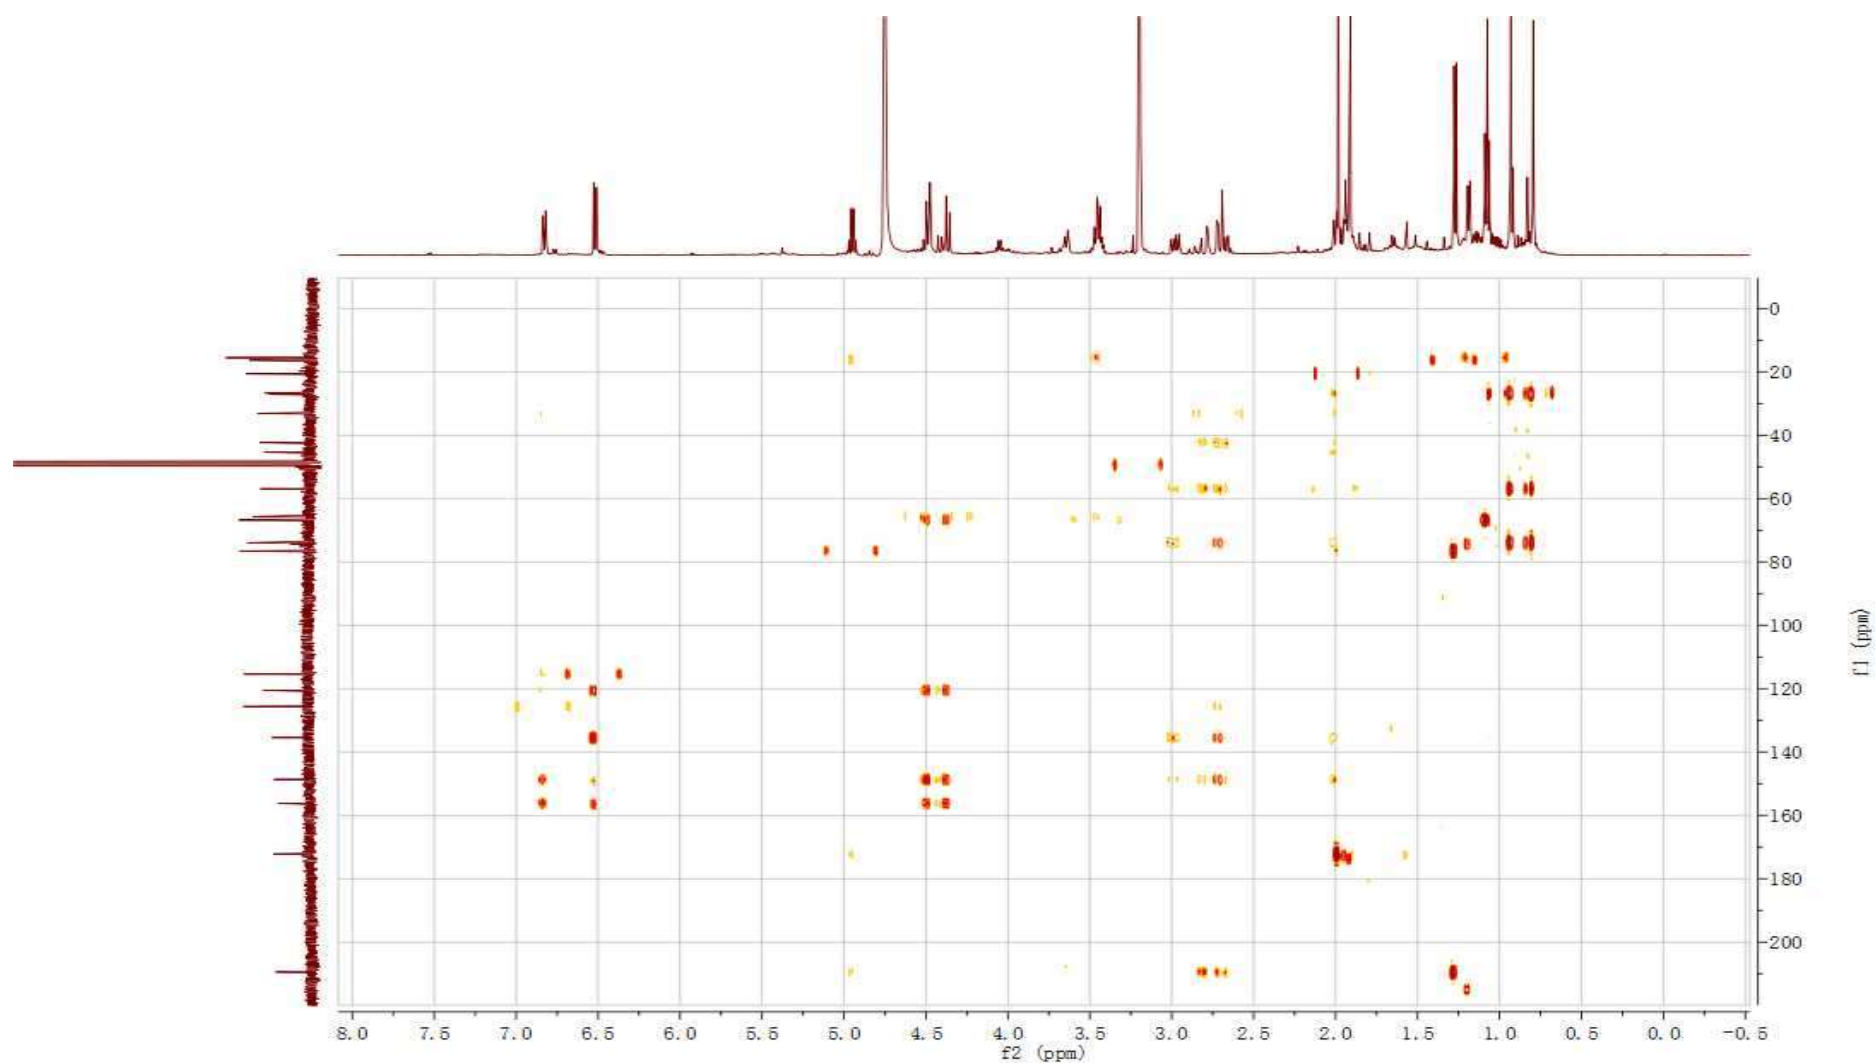

Figure S25. HMBC spectrum of the new compound **4**

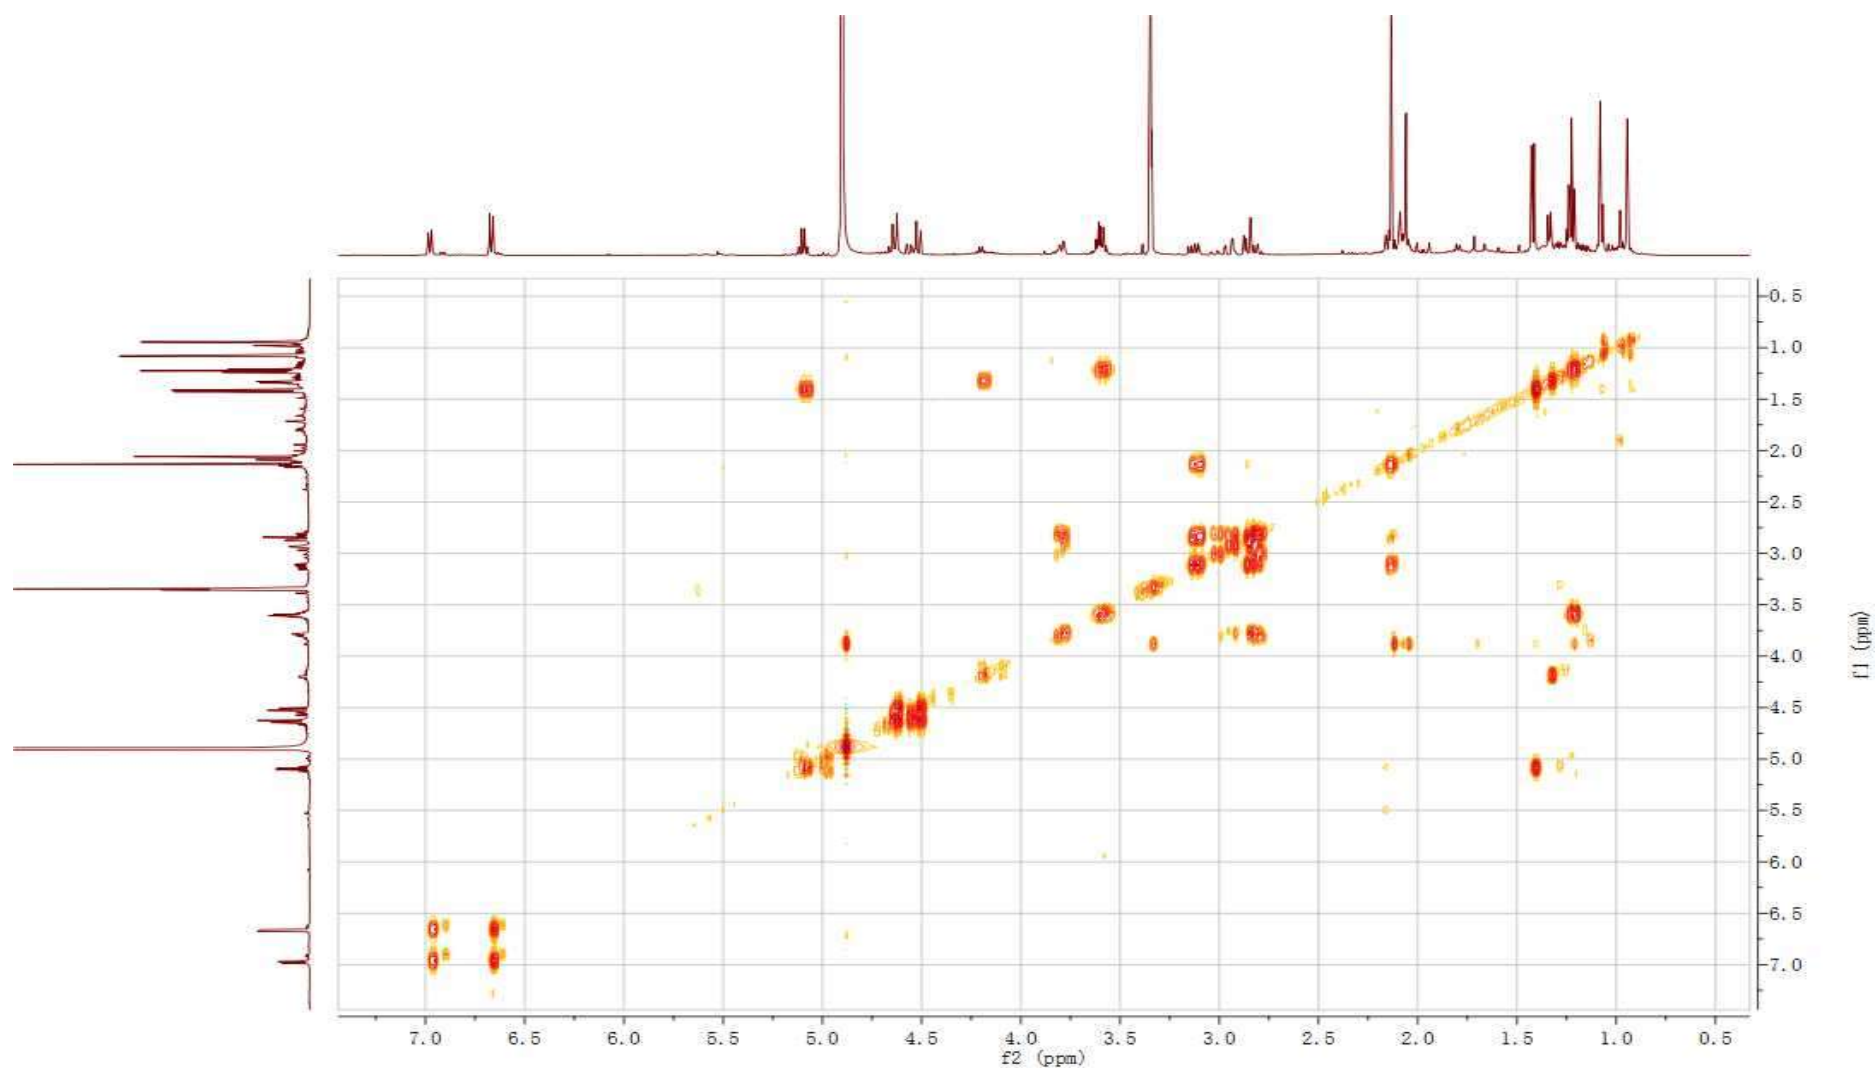

Figure S26. COSY spectrum of the new compound **4**

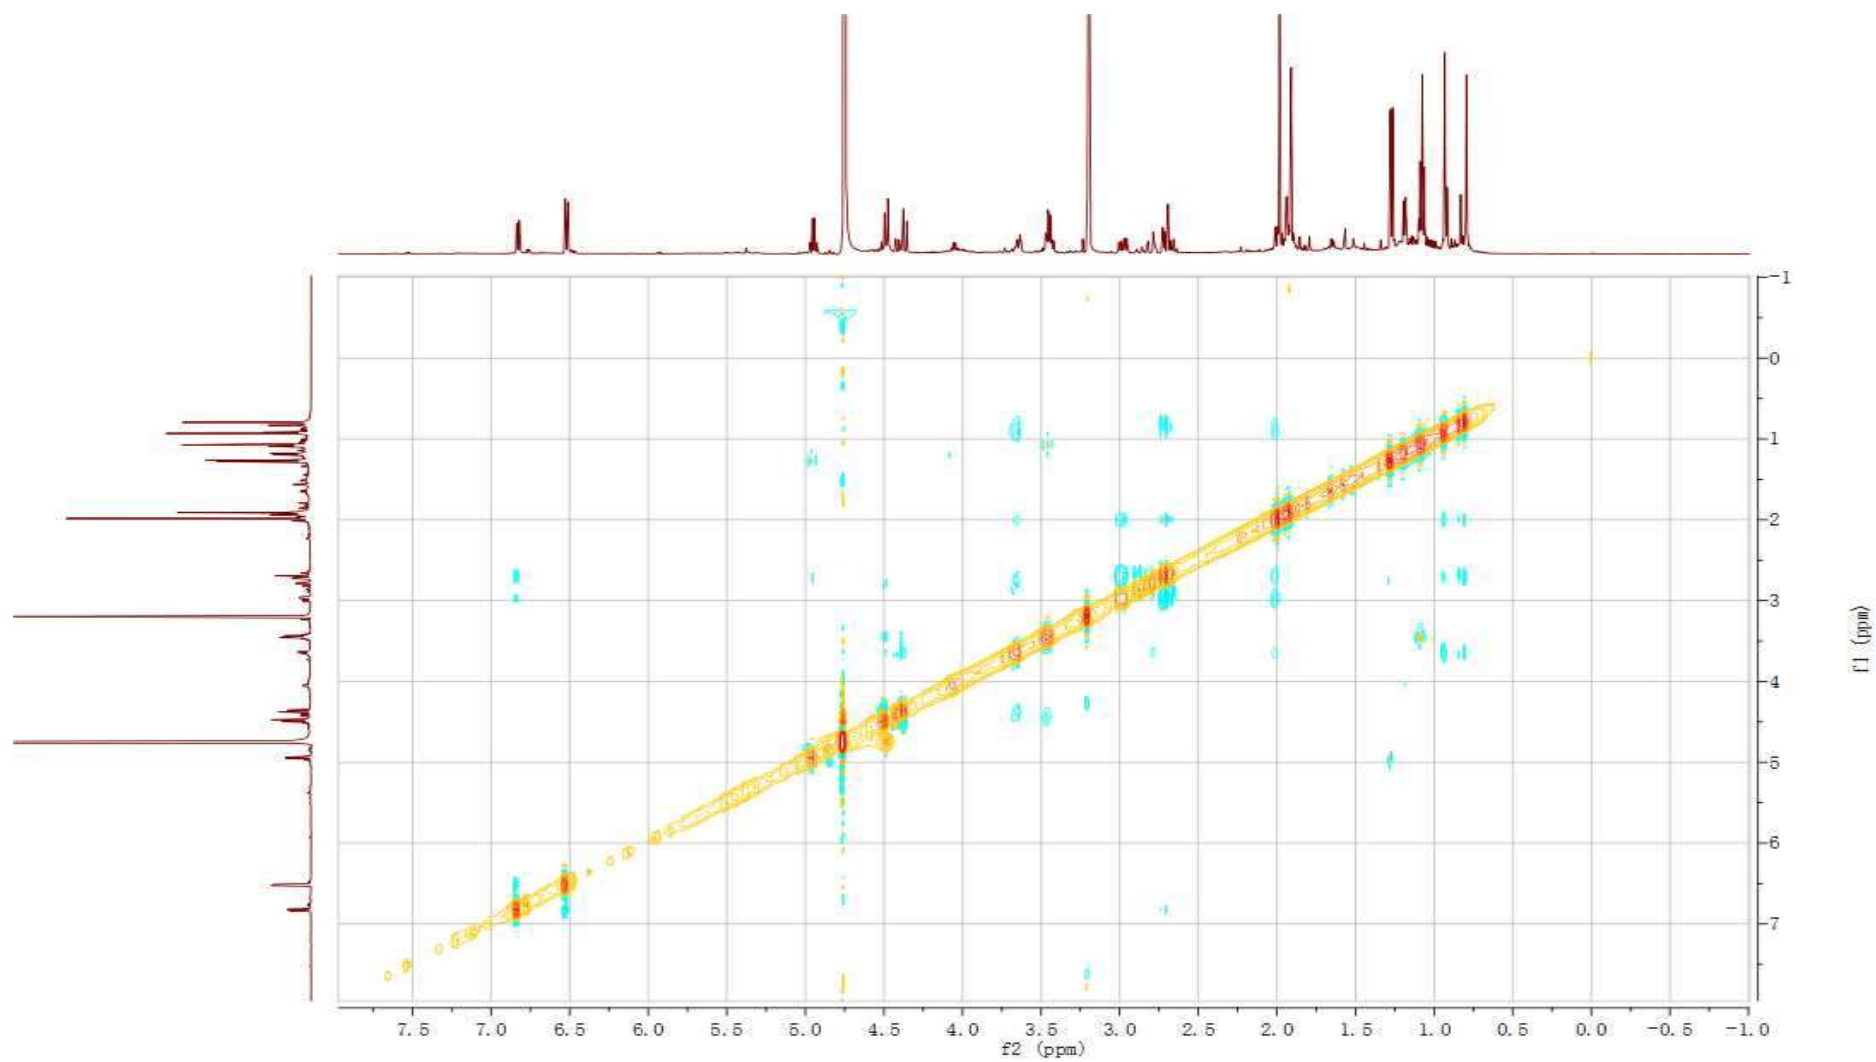

Figure S27. NOESY spectrum of the new compound **4**

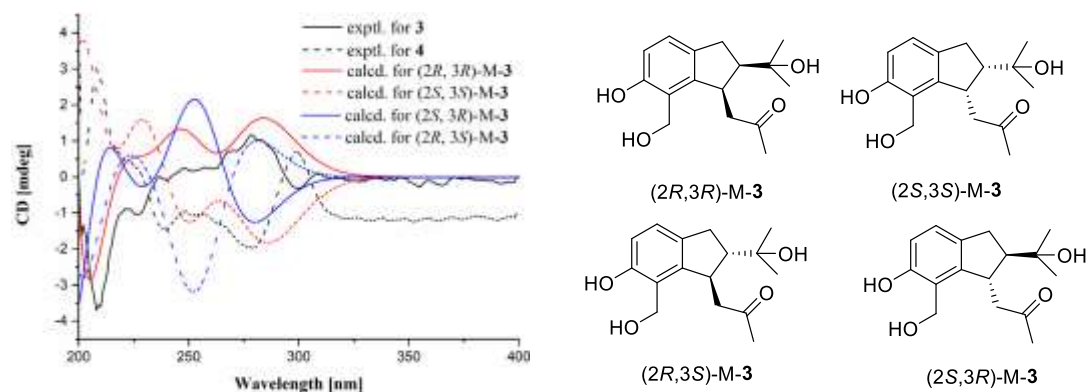

Figure S28. calculated and experimental ECD spectras of **3** and **4** using a truncated model.

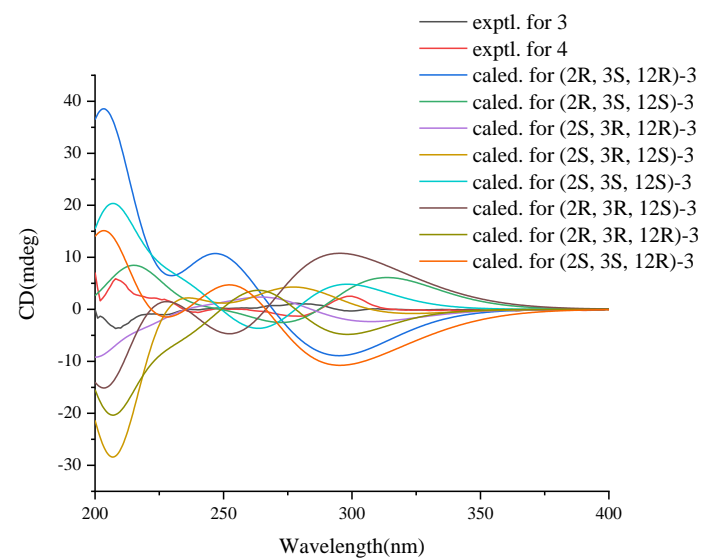

Figure S29. calculated and experimental ECD spectras of **3** and **4**.



| configuration                                   | $R_2$  | RMSE | DP4+(%) |
|-------------------------------------------------|--------|------|---------|
| <b>a</b> (2 <i>R</i> ,3 <i>R</i> ,12 <i>R</i> ) | 0.9982 | 2.52 | 0.00    |
| <b>b</b> (2 <i>R</i> ,3 <i>R</i> ,12 <i>S</i> ) | 0.9973 | 3.16 | 0.00    |
| <b>c</b> (2 <i>S</i> ,3 <i>S</i> ,12 <i>R</i> ) | 0.9977 | 2.91 | 0.00    |
| <b>d</b> (2 <i>S</i> ,3 <i>S</i> ,12 <i>S</i> ) | 0.9982 | 2.51 | 0.00    |
| <b>e</b> (2 <i>R</i> ,3 <i>S</i> ,12 <i>R</i> ) | 0.9987 | 2.20 | 50.08   |
| <b>f</b> (2 <i>S</i> ,3 <i>R</i> ,12 <i>R</i> ) | 0.9985 | 2.65 | 25.45   |
| <b>g</b> (2 <i>R</i> ,3 <i>S</i> ,12 <i>S</i> ) | 0.9984 | 2.70 | 4.38    |
| <b>h</b> (2 <i>S</i> ,3 <i>R</i> ,12 <i>S</i> ) | 0.9987 | 2.22 | 20.08   |

Figure S32. DP4<sup>+</sup> probability of <sup>13</sup>C NMR chemical shifts (compound **3**) .

|    | A       | B    | C          | D        | E        | F        | G                 | H        | I        | J        | K        | L        |
|----|---------|------|------------|----------|----------|----------|-------------------|----------|----------|----------|----------|----------|
| 2  | aP1P1P1 |      | PCM        |          | G-31G(d) |          | Shielding Tensors |          |          |          |          |          |
| 12 |         |      | DP4+       | 0.00%    | 0.00%    | 0.00%    | 0.00%             | 51.62%   | 23.60%   | 4.23%    | ####     | -        |
| 14 | Nuclei  | sp2? | experiment | Isomer 1 | Isomer 2 | Isomer 3 | Isomer 4          | Isomer 5 | Isomer 6 | Isomer 7 | Isomer 8 | Isomer 9 |
| 15 | C       | x    | 114        | 85.2     | 84.9     | 85.1     | 85.2              | 84.5     | 84.3     | 84.2     | 84.5     |          |
| 16 | C       | x    | 154.8      | 44.4     | 44.4     | 44.4     | 44.4              | 43.1     | 44.6     | 44.6     | 43.2     |          |
| 17 | C       | x    | 118.1      | 83.1     | 82.8     | 83.1     | 83.0              | 81.9     | 82.4     | 82.6     | 82.2     |          |
| 18 | C       | x    | 147.2      | 50.7     | 50.7     | 50.5     | 50.7              | 52.8     | 52.9     | 53.0     | 52.8     |          |
| 19 | C       | x    | 134        | 66.8     | 67.2     | 67.1     | 66.8              | 65.2     | 65.2     | 65.0     | 65.2     |          |
| 20 | C       | x    | 124.2      | 73.8     | 73.9     | 73.9     | 73.8              | 73.9     | 73.7     | 73.7     | 74.0     |          |
| 21 | C       |      | 60.9       | 153.6    | 153.2    | 154.0    | 153.6             | 151.4    | 151.8    | 151.8    | 151.3    |          |
| 22 | C       |      | 55.5       | 141.8    | 142.2    | 142.2    | 141.9             | 141.9    | 140.3    | 140.3    | 141.7    |          |
| 23 | C       |      | 11.7       | 162.2    | 162.2    | 162.2    | 162.3             | 159.6    | 159.1    | 159.1    | 159.5    |          |
| 24 | C       |      | 64.3       | 128.3    | 127.7    | 127.9    | 128.1             | 128.2    | 127.3    | 127.5    | 128.3    |          |
| 25 | C       |      | 65.4       | 132.9    | 132.5    | 132.7    | 132.9             | 132.3    | 131.9    | 132.0    | 132.6    |          |
| 26 | C       |      | 14.1       | 179.19   | 178.85   | 179.16   | 179.17            | 178.9    | 178.5    | 178.5    | 179.0    |          |
| 27 | C       |      | 72.5       | 126.16   | 125.57   | 125.68   | 126.21            | 125.3    | 124.8    | 124.7    | 125.3    |          |
| 28 | C       |      | 25.3       | 162.93   | 163.07   | 163.08   | 163.00            | 171.7    | 170.8    | 170.8    | 171.8    |          |
| 29 | C       |      | 25.7       | 166.48   | 165.59   | 165.74   | 166.62            | 165.8    | 166.2    | 166.4    | 165.7    |          |
| 30 | C       |      | 43.9       | 152.79   | 154.80   | 154.57   | 152.79            | 148.9    | 148.2    | 147.6    | 148.8    |          |
| 31 | C       | x    | 208        | -4.73    | -13.05   | -10.65   | -4.73             | -6.8     | -9.9     | -9.8     | -6.7     |          |
| 32 | C       |      | 75.1       | 117.68   | 120.33   | 119.12   | 117.78            | 119.4    | 118.5    | 118.7    | 119.4    |          |
| 33 | C       | x    | 170.7      | 28.16    | 28.39    | 28.10    | 28.15             | 27.3     | 26.2     | 26.0     | 27.3     |          |
| 34 | C       |      | 14.8       | 178.44   | 176.95   | 176.40   | 178.34            | 178.0    | 177.8    | 177.7    | 177.9    |          |
| 35 | C       |      | 18.7       | 172.97   | 172.68   | 172.74   | 173.03            | 173.0    | 172.3    | 172.0    | 173.0    |          |
| 36 |         |      |            |          |          |          |                   |          |          |          |          |          |

Figure S33. The data of DP4plus method of compound 4

|    | A                | B        | C         | D                 | E        | F        | G        | H        | I        | J        | K        |
|----|------------------|----------|-----------|-------------------|----------|----------|----------|----------|----------|----------|----------|
| 1  | Functional       | Solvent? | Basis Set | Type of Data      |          |          |          |          |          |          |          |
| 2  | mPW91            | PCM      | 6-31G(d)  | Shielding Tensors |          |          |          |          |          |          |          |
| 3  |                  |          |           |                   |          |          |          |          |          |          |          |
| 4  |                  |          | Isomer 1  | Isomer 2          | Isomer 3 | Isomer 4 | Isomer 5 | Isomer 6 | Isomer 7 | Isomer 8 | Isomer 9 |
| 5  | sDP4+ (H data)   | -        | -         | -                 | -        | -        | -        | -        | -        | -        | -        |
| 6  | sDP4+ (C data)   | 0.46%    | 0.00%     | 0.00%             | 0.59%    | 59.06%   | 1.22%    | 0.58%    | 38.09%   | -        | -        |
| 7  | sDP4+ (all data) | 0.46%    | 0.00%     | 0.00%             | 0.59%    | 59.06%   | 1.22%    | 0.58%    | 38.09%   | -        | -        |
| 8  | uDP4+ (H data)   | -        | -         | -                 | -        | -        | -        | -        | -        | -        | -        |
| 9  | uDP4+ (C data)   | 0.02%    | 0.00%     | 0.01%             | 0.03%    | 3.12%    | 58.93%   | 25.97%   | 1.92%    | -        | -        |
| 10 | uDP4+ (all data) | 0.02%    | 0.00%     | 0.01%             | 0.03%    | 3.12%    | 58.93%   | 25.97%   | 1.92%    | -        | -        |
| 11 | DP4+ (H data)    | -        | -         | -                 | -        | -        | -        | -        | -        | -        | -        |
| 12 | DP4+ (C data)    | 0.00%    | 0.00%     | 0.00%             | 0.00%    | 51.62%   | 23.60%   | 4.23%    | 20.53%   | -        | -        |
| 13 | DP4+ (all data)  | 0.00%    | 0.00%     | 0.00%             | 0.00%    | 51.62%   | 23.60%   | 4.23%    | 20.53%   | -        | -        |

Figure S34. Comparison of the experimental  $^{13}\text{C}$  NMR data and mean absolute error of compound **4**

| configuration                                   | $R_2$  | RMSE | DP4+(%) |
|-------------------------------------------------|--------|------|---------|
| <b>a</b> (2 <i>R</i> ,3 <i>R</i> ,12 <i>R</i> ) | 0.9983 | 2.47 | 0.00    |
| <b>b</b> (2 <i>R</i> ,3 <i>R</i> ,12 <i>S</i> ) | 0.9974 | 3.13 | 0.00    |
| <b>c</b> (2 <i>S</i> ,3 <i>S</i> ,12 <i>R</i> ) | 0.9977 | 2.87 | 0.00    |
| <b>d</b> (2 <i>S</i> ,3 <i>S</i> ,12 <i>S</i> ) | 0.9983 | 2.45 | 0.00    |
| <b>e</b> (2 <i>R</i> ,3 <i>S</i> ,12 <i>R</i> ) | 0.9988 | 2.17 | 51.62   |
| <b>f</b> (2 <i>S</i> ,3 <i>R</i> ,12 <i>R</i> ) | 0.9985 | 2.64 | 23.60   |
| <b>g</b> (2 <i>R</i> ,3 <i>S</i> ,12 <i>S</i> ) | 0.9985 | 2.69 | 4.23    |
| <b>h</b> (2 <i>S</i> ,3 <i>R</i> ,12 <i>S</i> ) | 0.9987 | 2.20 | 20.53   |

Figure S35. DP4<sup>+</sup> probability of  $^{13}\text{C}$  NMR chemical shifts.

## Mass Spectrum SmartFormula Report

### Analysis Info

Analysis Name D:\Data\MS\data\201907\wangjianjiao\_LH-C1\_pos\_65\_01\_6940.d  
 Method LC\_Direct Infusion\_pos\_70-500mz.m  
 Sample Name wangjianjiao\_LH-C1\_pos  
 Comment

Acquisition Date 7/16/2019 3:12:22 PM  
 Operator SCSIO  
 Instrument maXis 255552.00029

### Acquisition Parameter

|             |          |                      |          |                  |           |
|-------------|----------|----------------------|----------|------------------|-----------|
| Source Type | ESI      | Ion Polarity         | Positive | Set Nebulizer    | 0.4 Bar   |
| Focus       | Active   | Set Capillary        | 4500 V   | Set Dry Heater   | 180 °C    |
| Scan Begin  | 70 m/z   | Set End Plate Offset | -500 V   | Set Dry Gas      | 4.0 l/min |
| Scan End    | 1500 m/z | Set Charging Voltage | 0 V      | Set Divert Valve | Waste     |
|             |          | Set Corona           | 0 nA     | Set APCI Heater  | 0 °C      |

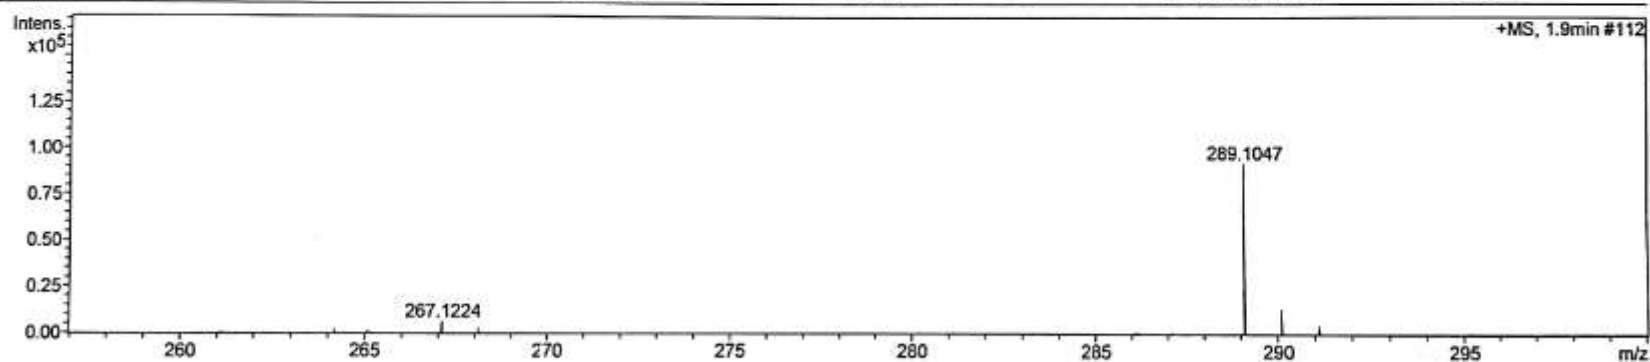

| Meas. m/z | # | Ion Formula                                       | Score  | m/z      | err [ppm] | err [mDa] | mSigma | rdb  | e <sup>-</sup> Conf | N-Rule |
|-----------|---|---------------------------------------------------|--------|----------|-----------|-----------|--------|------|---------------------|--------|
| 267.1224  | 1 | C <sub>14</sub> H <sub>19</sub> O <sub>5</sub>    | 100.00 | 267.1227 | 1.3       | 0.3       | 15.4   | 5.5  | even                | ok     |
| 289.1047  | 1 | C <sub>14</sub> H <sub>18</sub> NaO <sub>5</sub>  | 100.00 | 289.1046 | -0.3      | -0.1      | 10.1   | 5.5  | even                | ok     |
| 555.2195  | 1 | C <sub>28</sub> H <sub>36</sub> NaO <sub>10</sub> | 100.00 | 555.2201 | 1.0       | 0.6       | 28.8   | 10.5 | even                | ok     |

Figure S36. HRESI-MS spectrum of the new compound 5

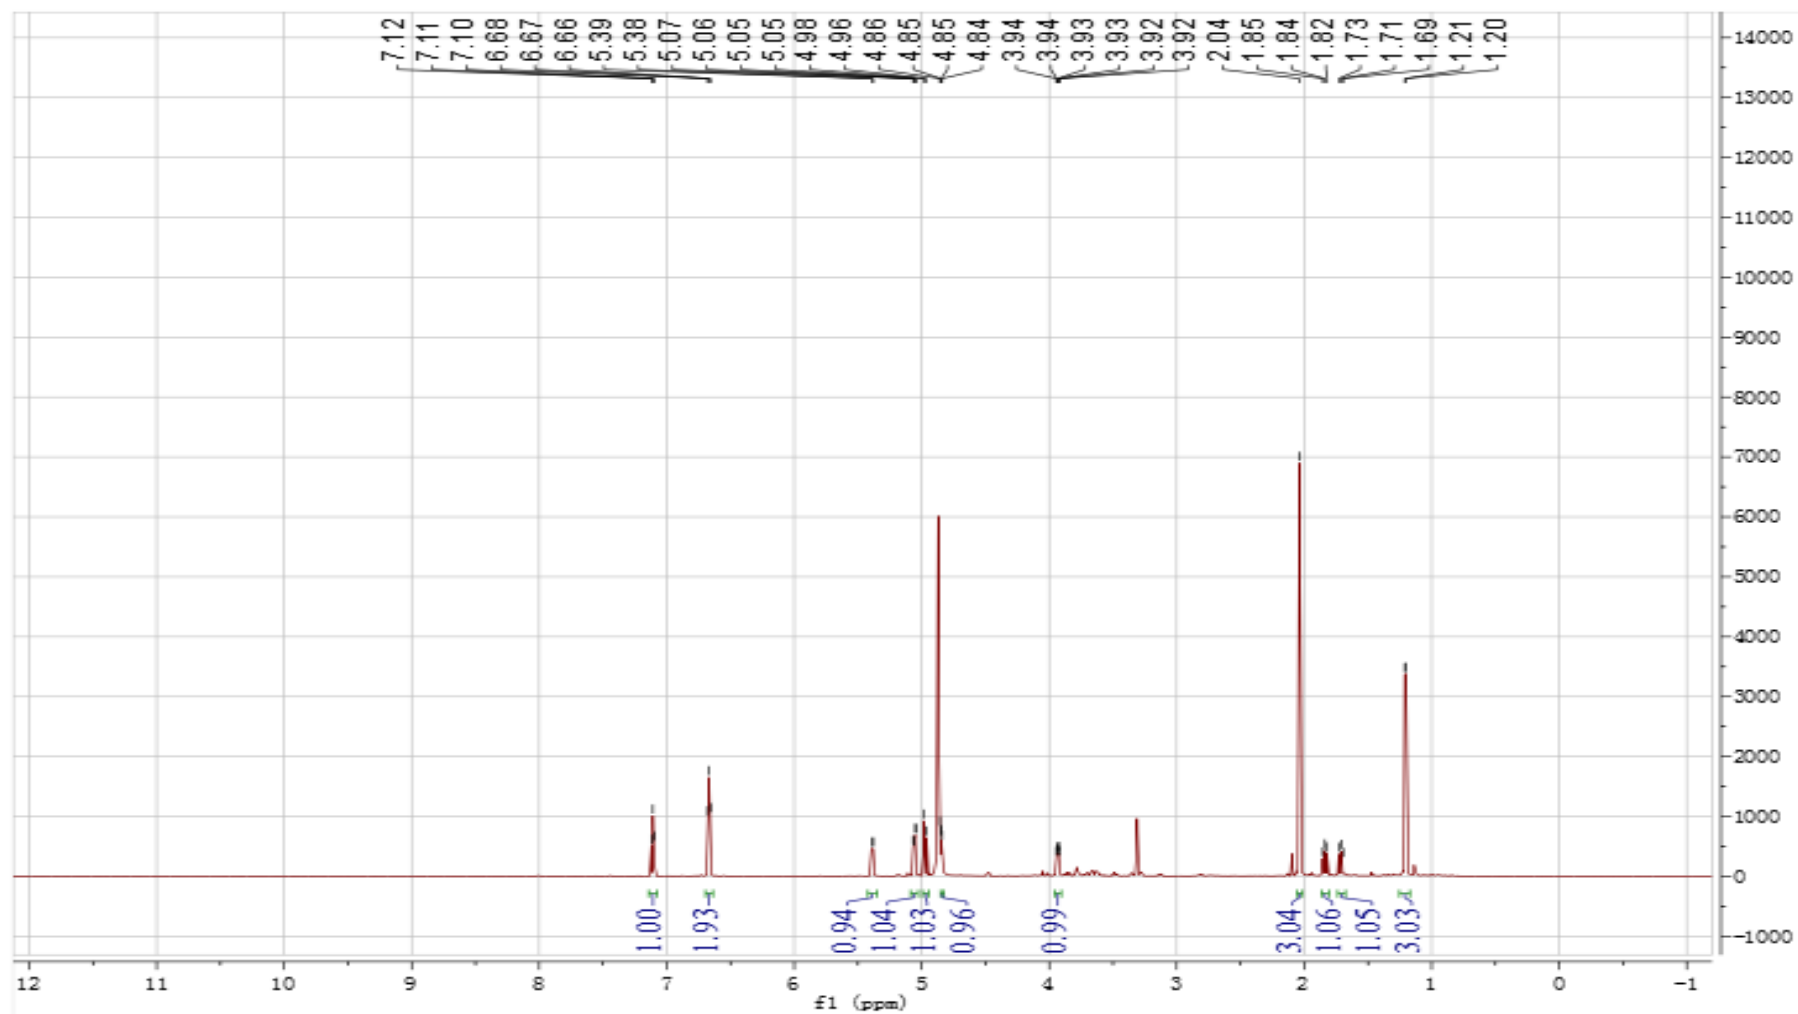

Figure S37. <sup>1</sup>H NMR (500 MHz, CD<sub>3</sub>OD) spectrum of the new compound **5**

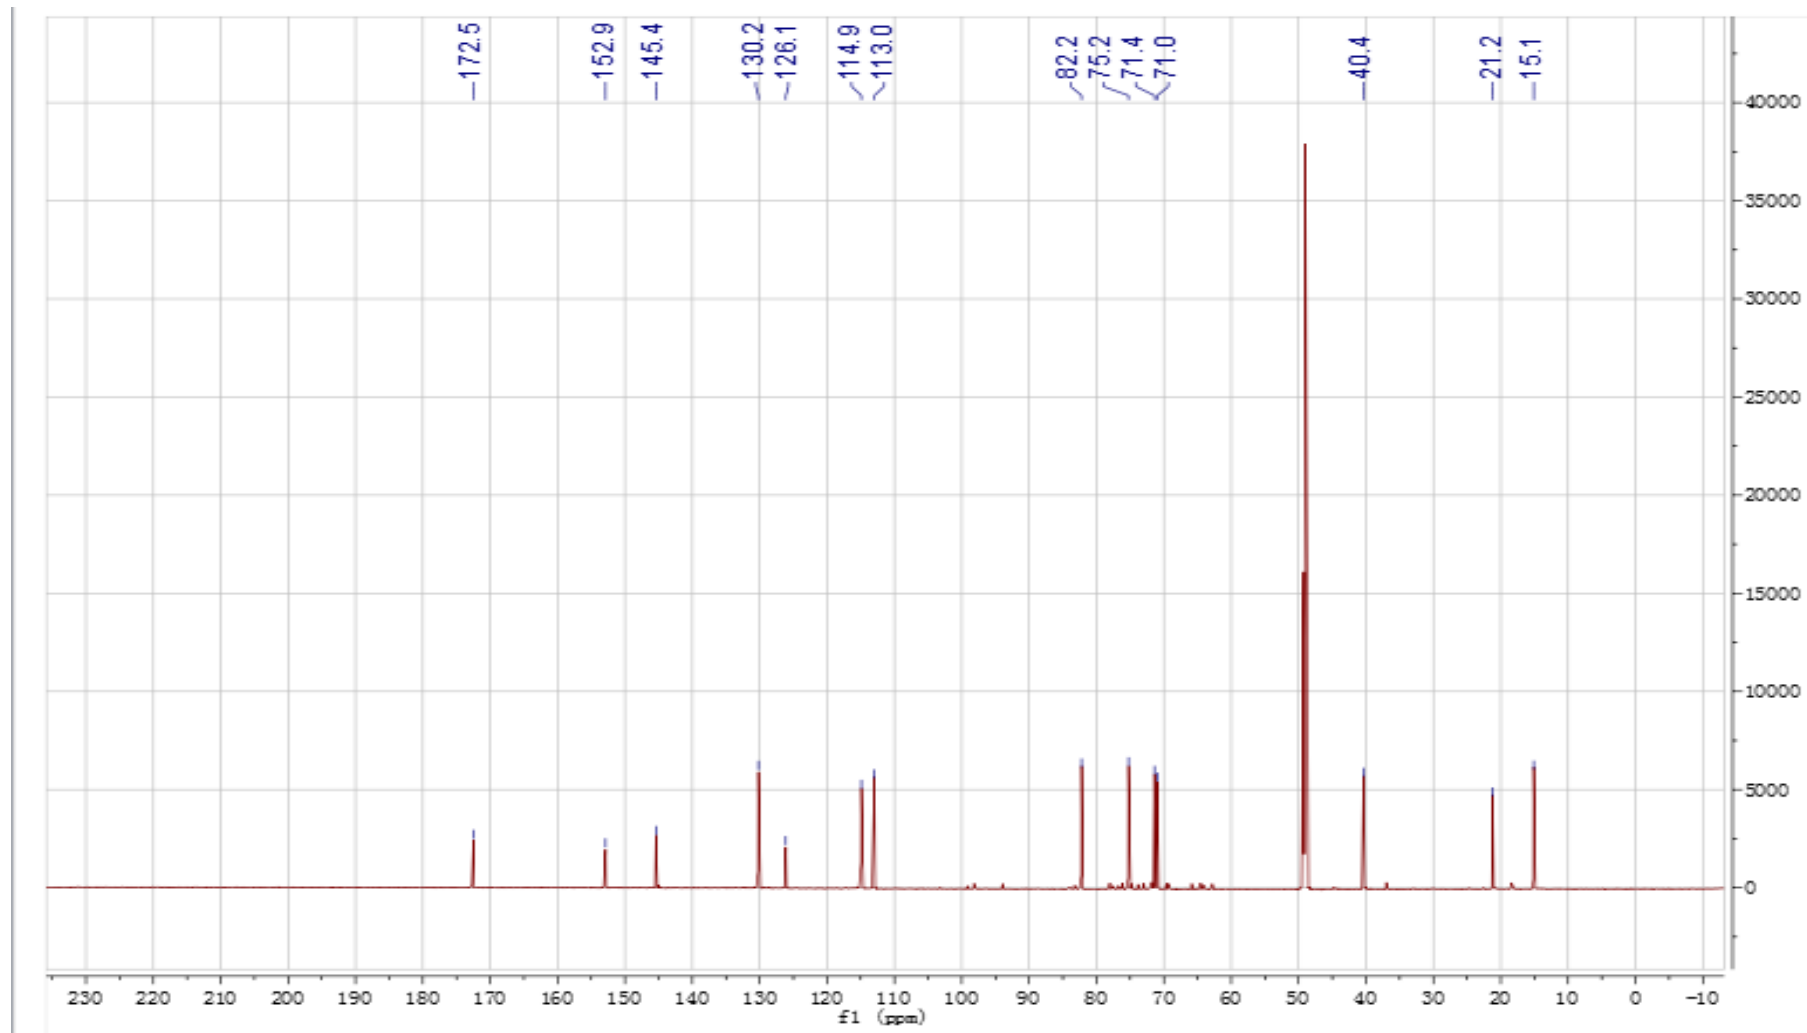

Figure S38.  $^{13}\text{C}$  NMR (125 MHz,  $\text{CD}_3\text{OD}$ ) spectrum of the new compound **5**

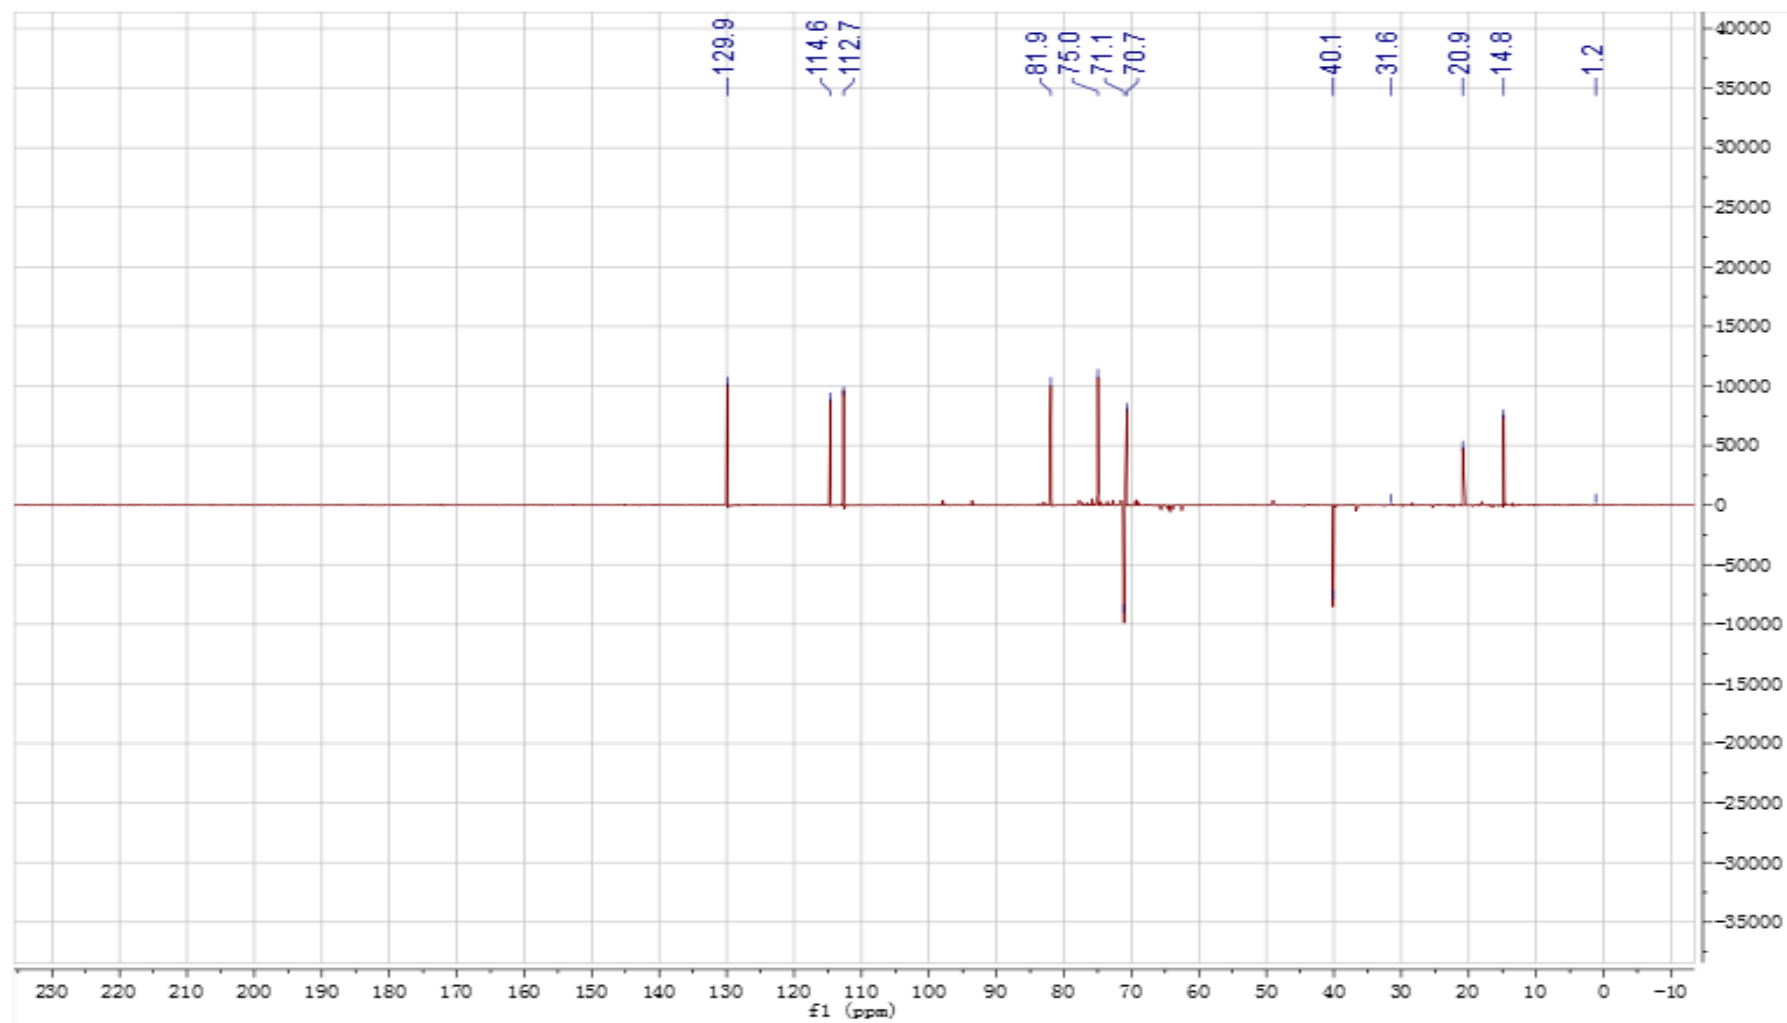

Figure S39.  $^{135}$  DEPT (125 MHz,  $\text{CD}_3\text{OD}$ ) spectrum of the new compound **5**

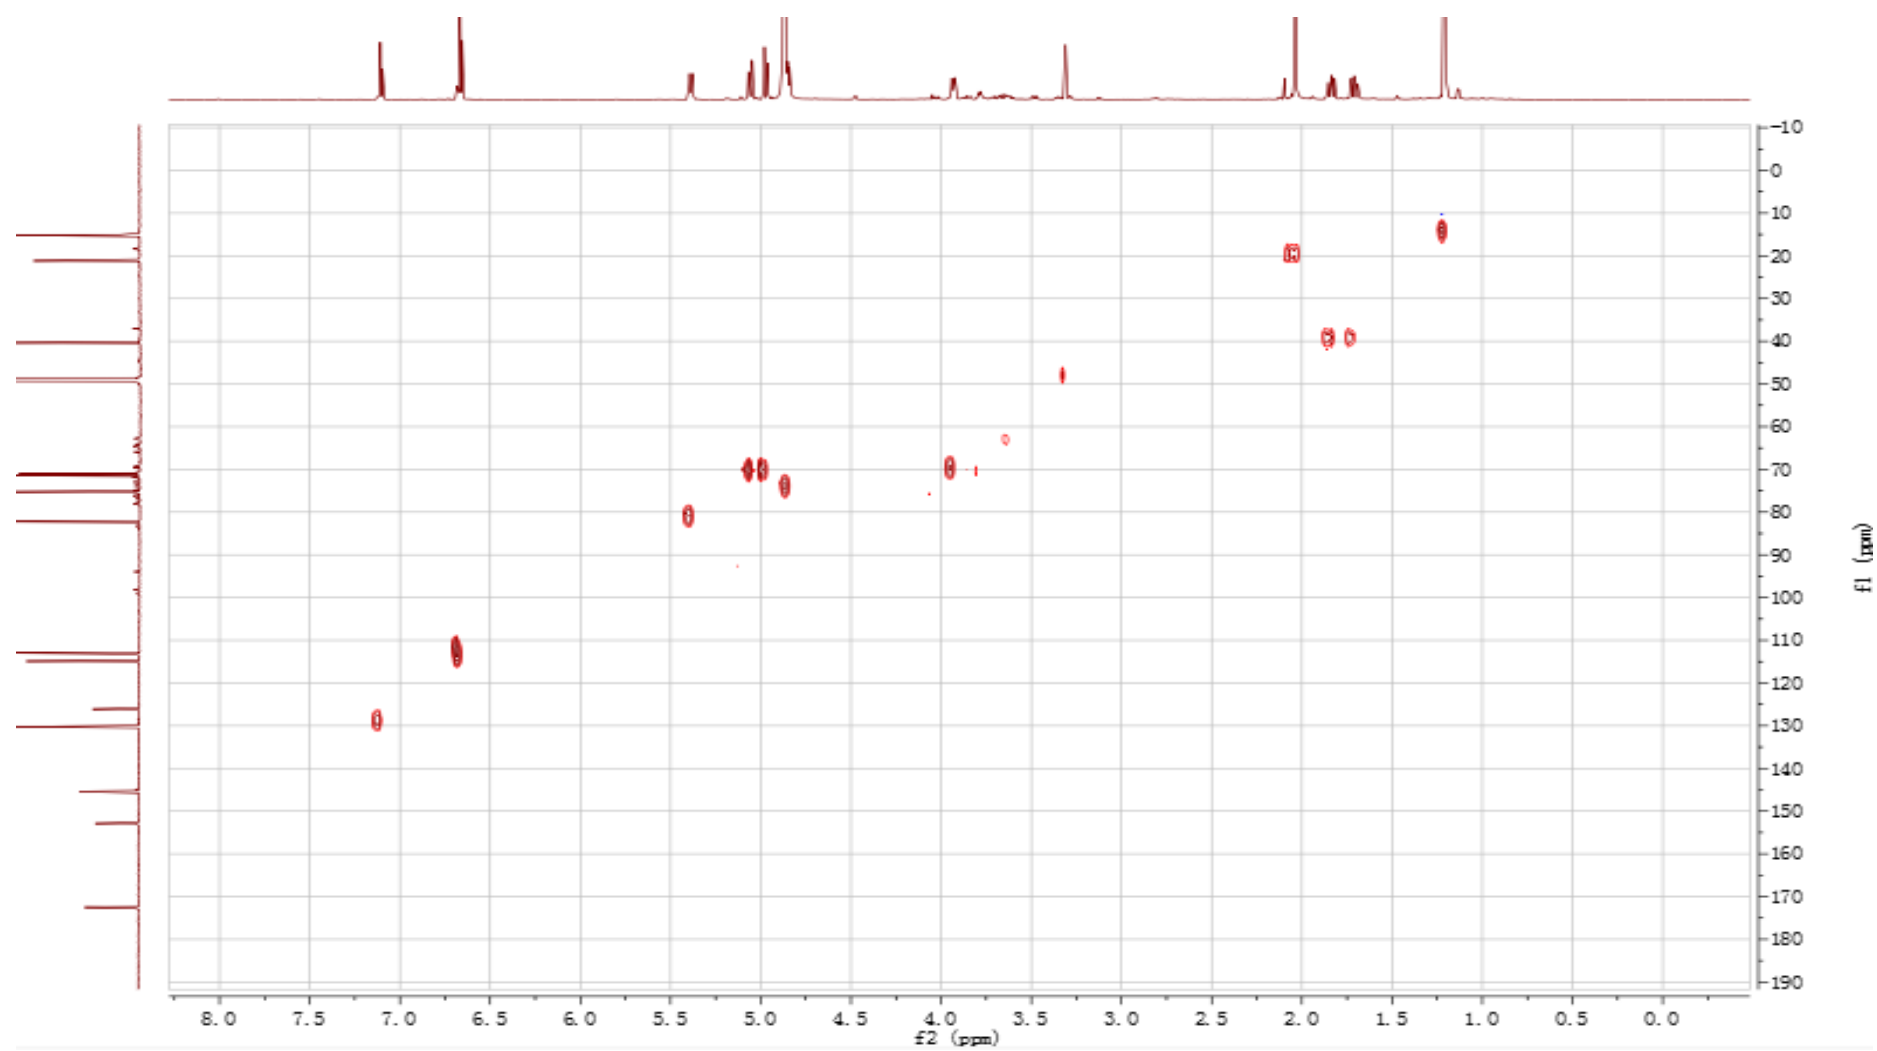

Figure S40. HSQC spectrum of the new compound **5**

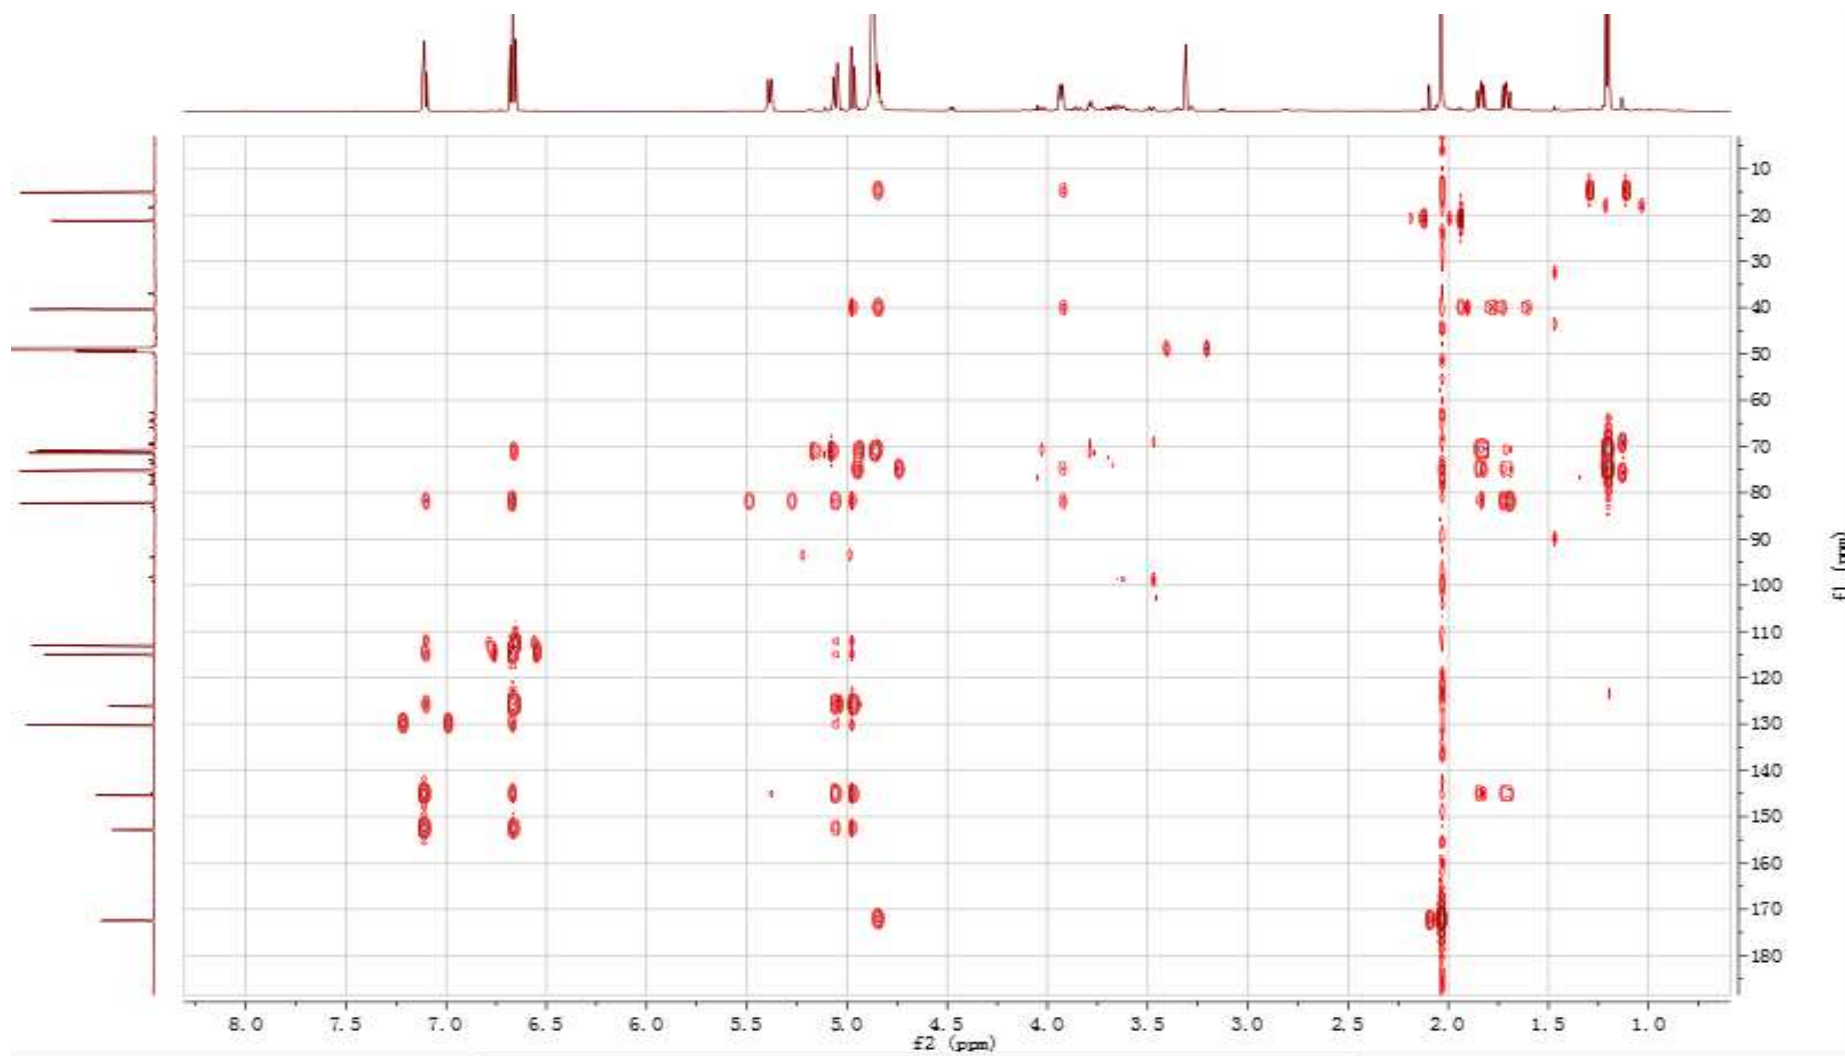

Figure S41. HMBC spectrum of the new compound **5**

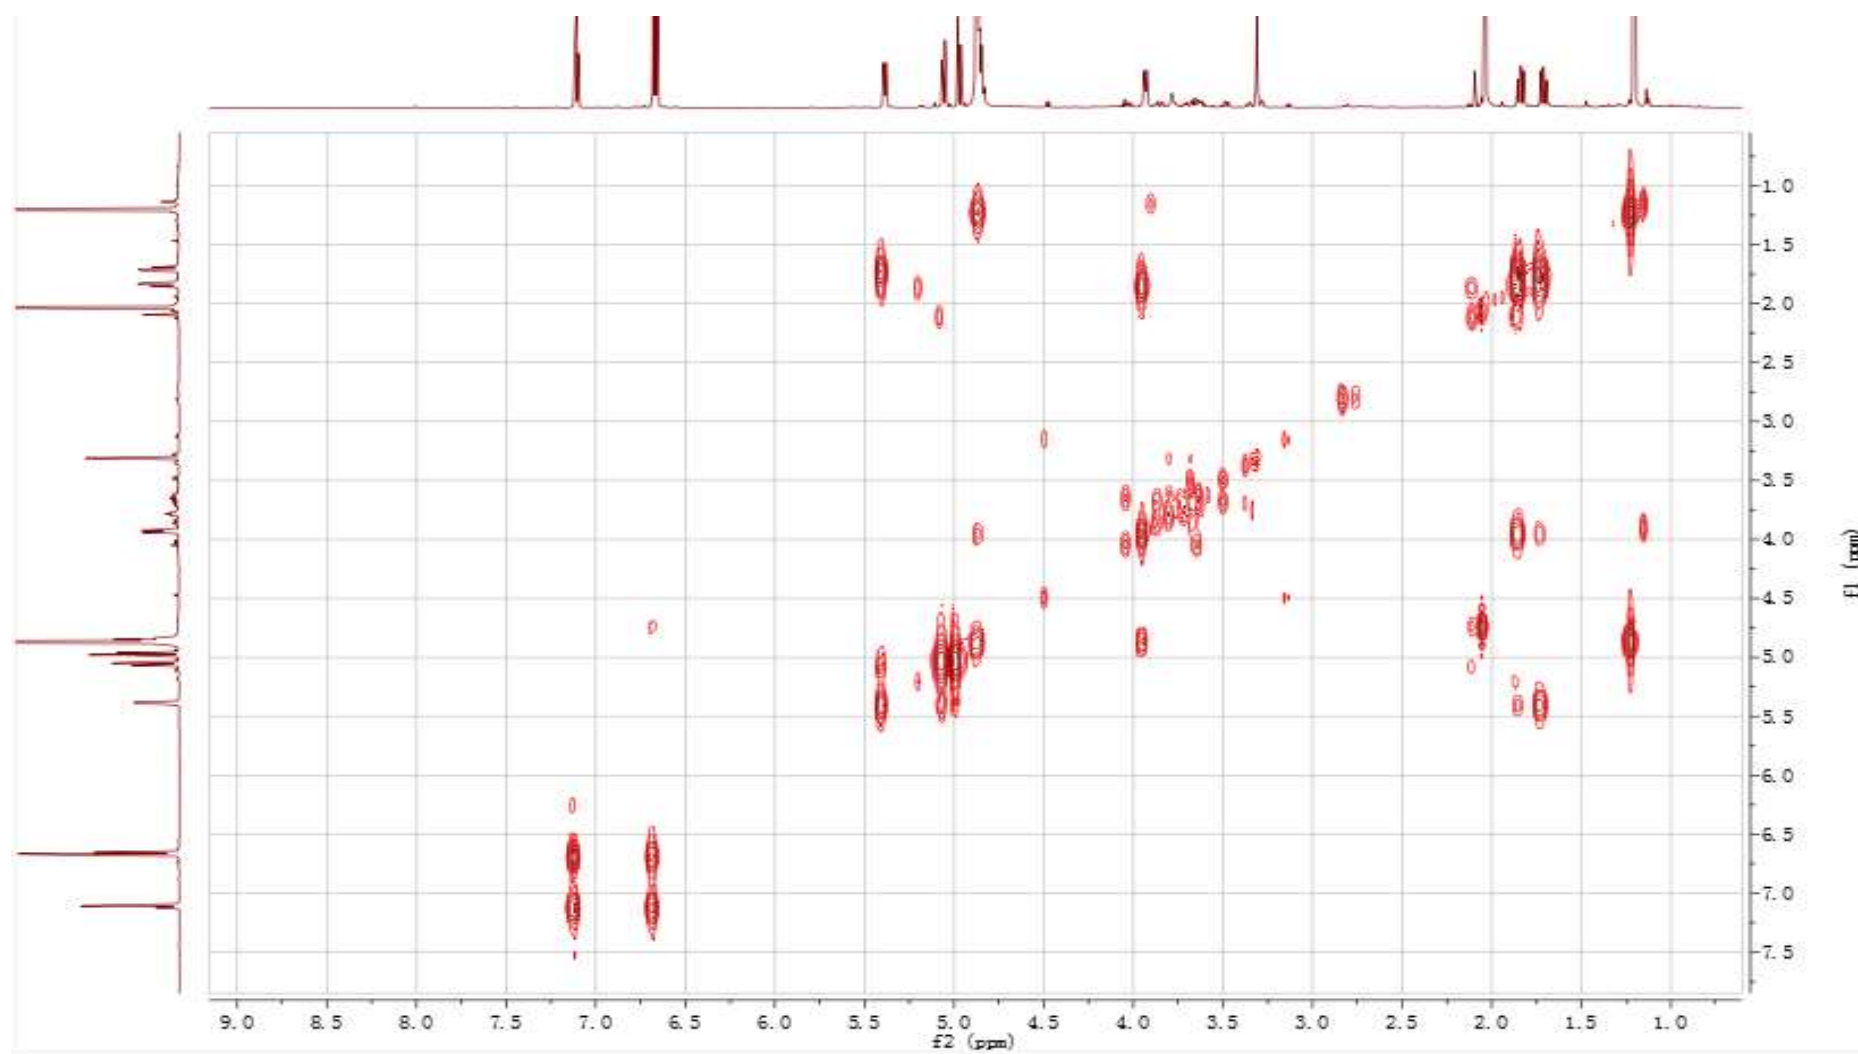

Figure S42. COSY spectrum of the new compound **5**

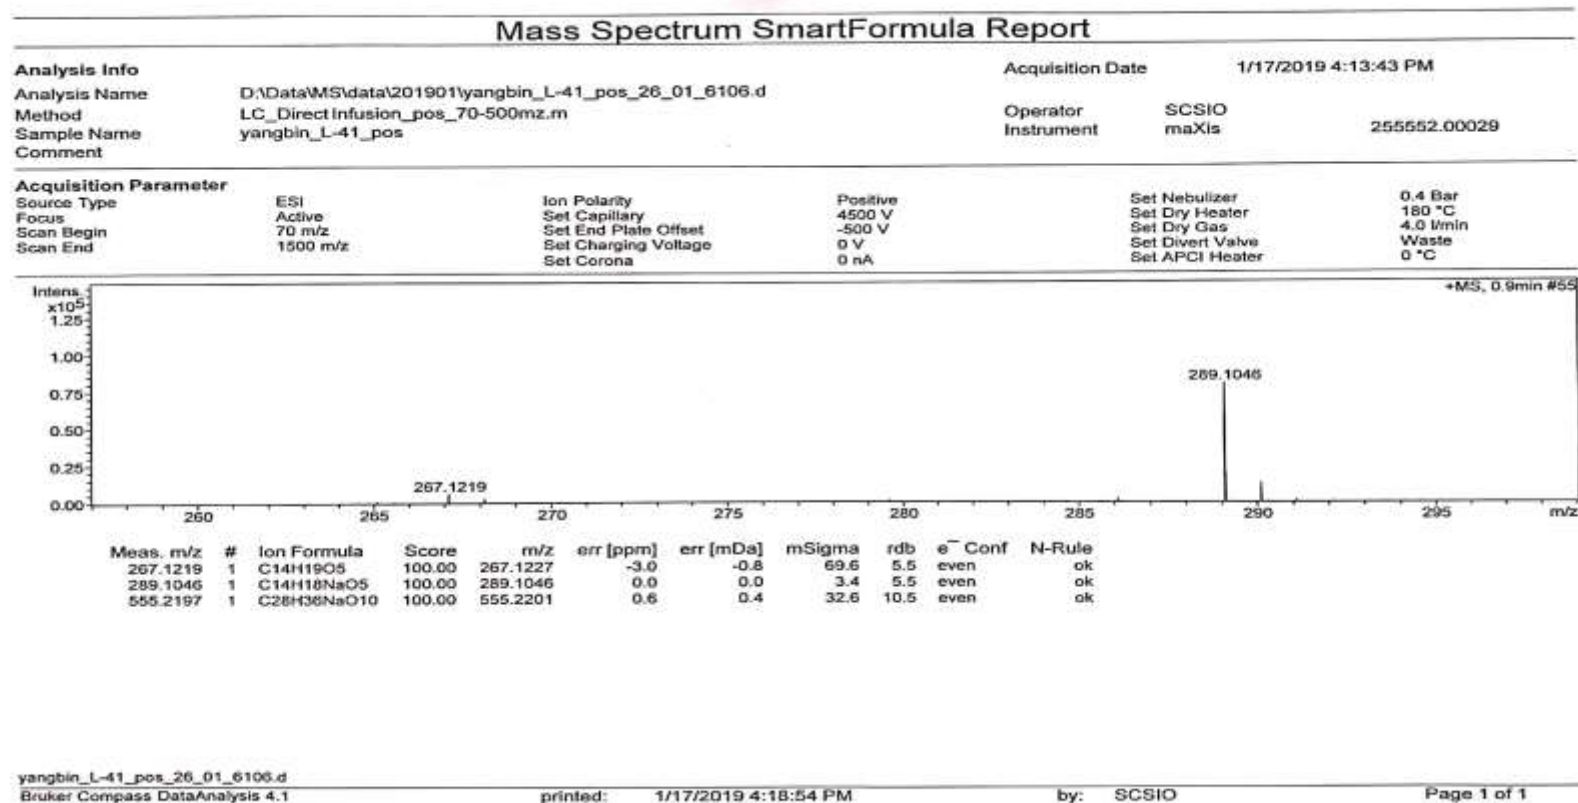

Figure S43. HRESI-MS spectrum of compound **6**

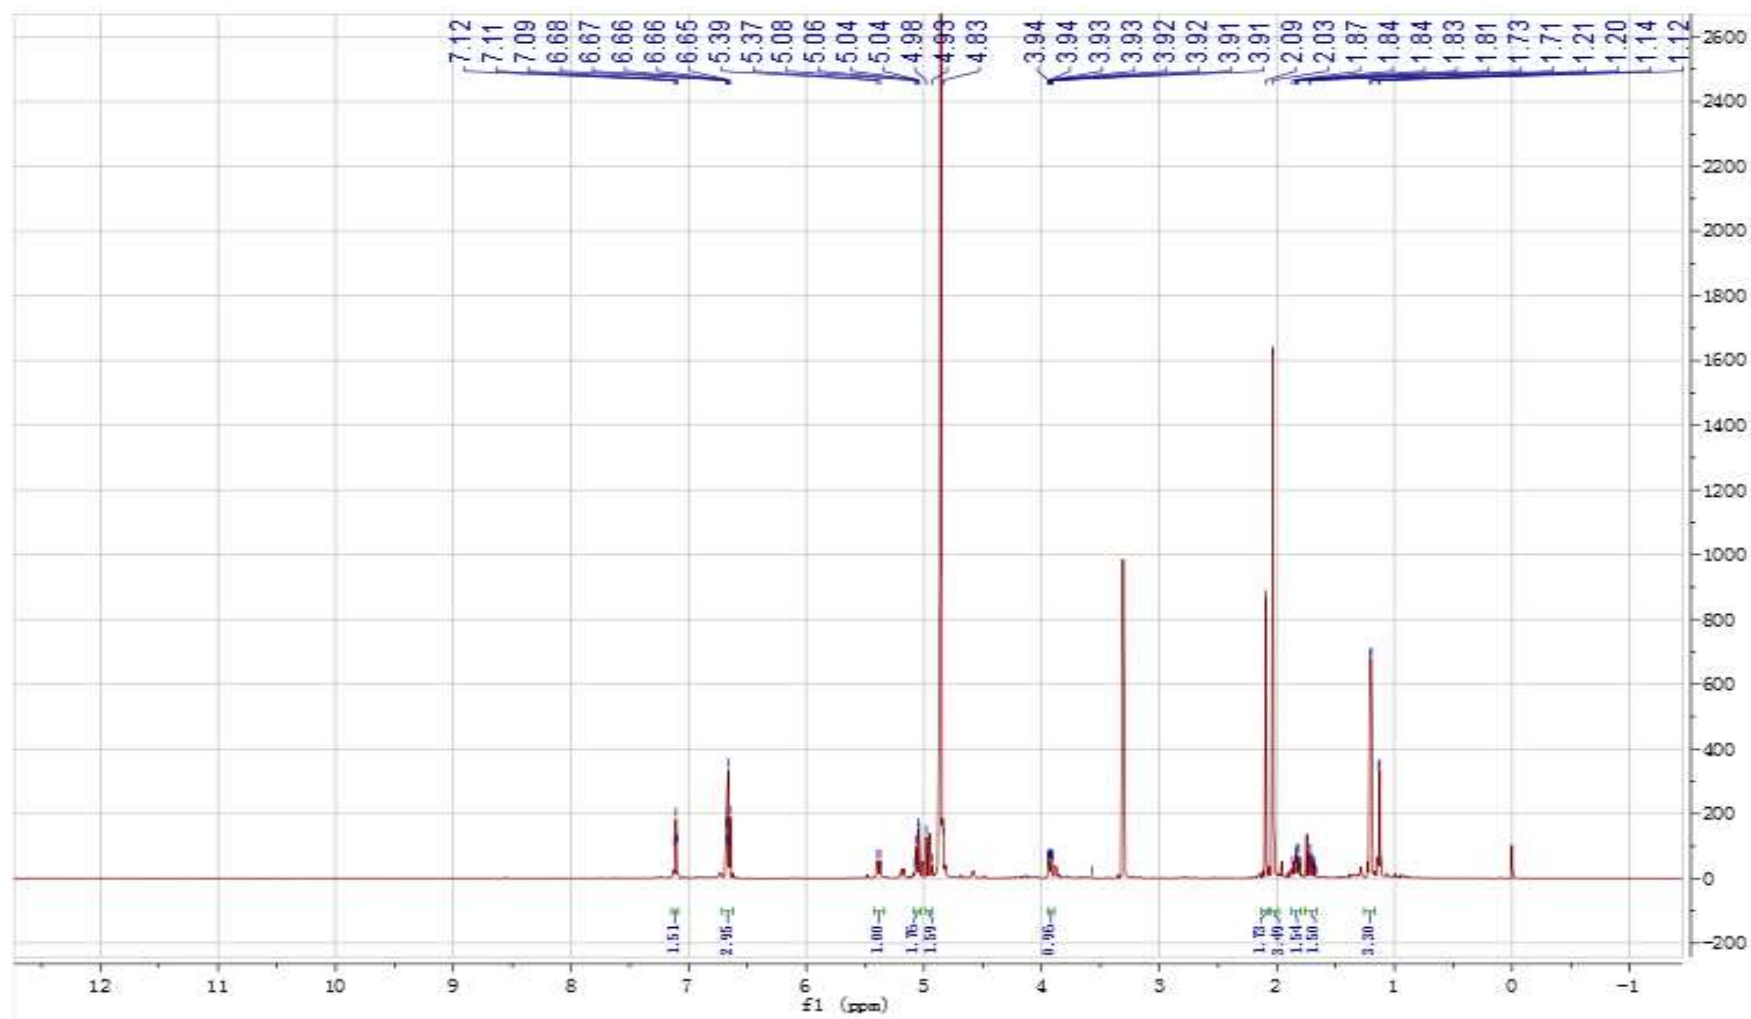

Figure S44. <sup>1</sup>H NMR (500 MHz, CD<sub>3</sub>OD) spectrum of compound **6**

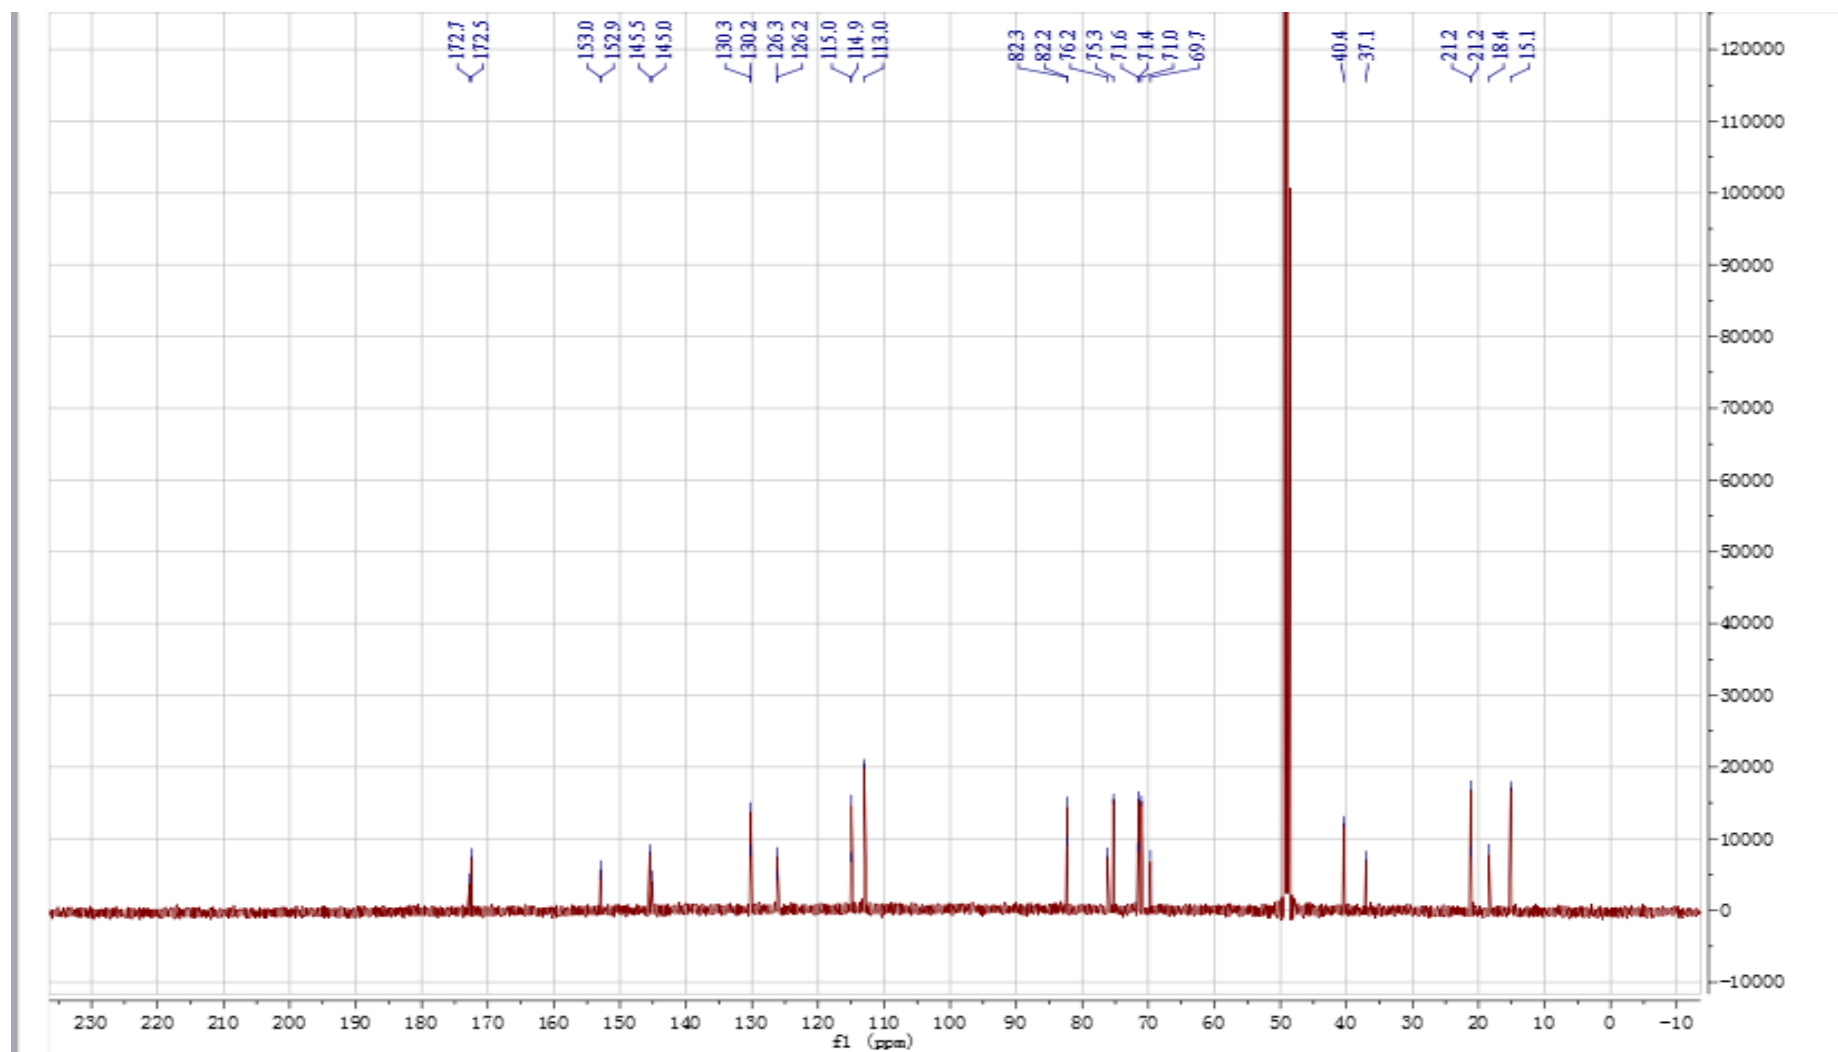

Figure S45. <sup>13</sup>C NMR (125 MHz, CD<sub>3</sub>OD) spectrum of compound **6**

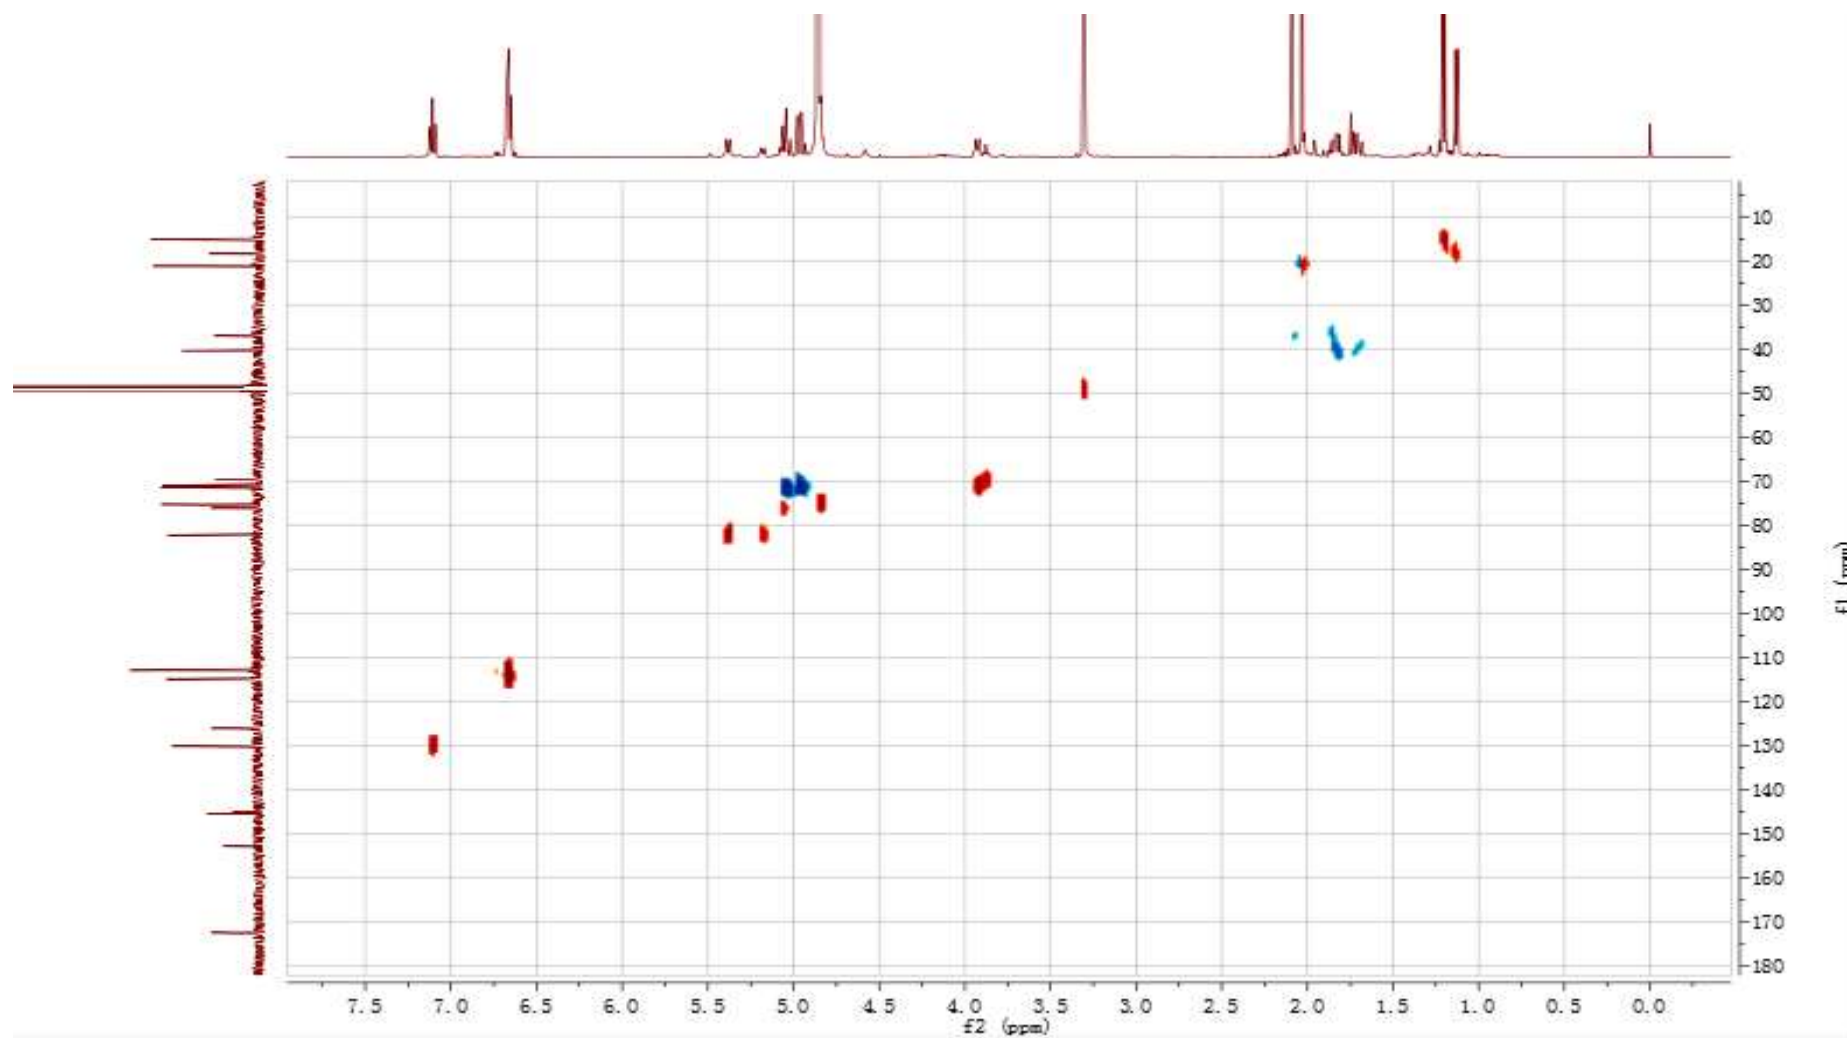

Figure S46. HSQC spectrum of compound **6**

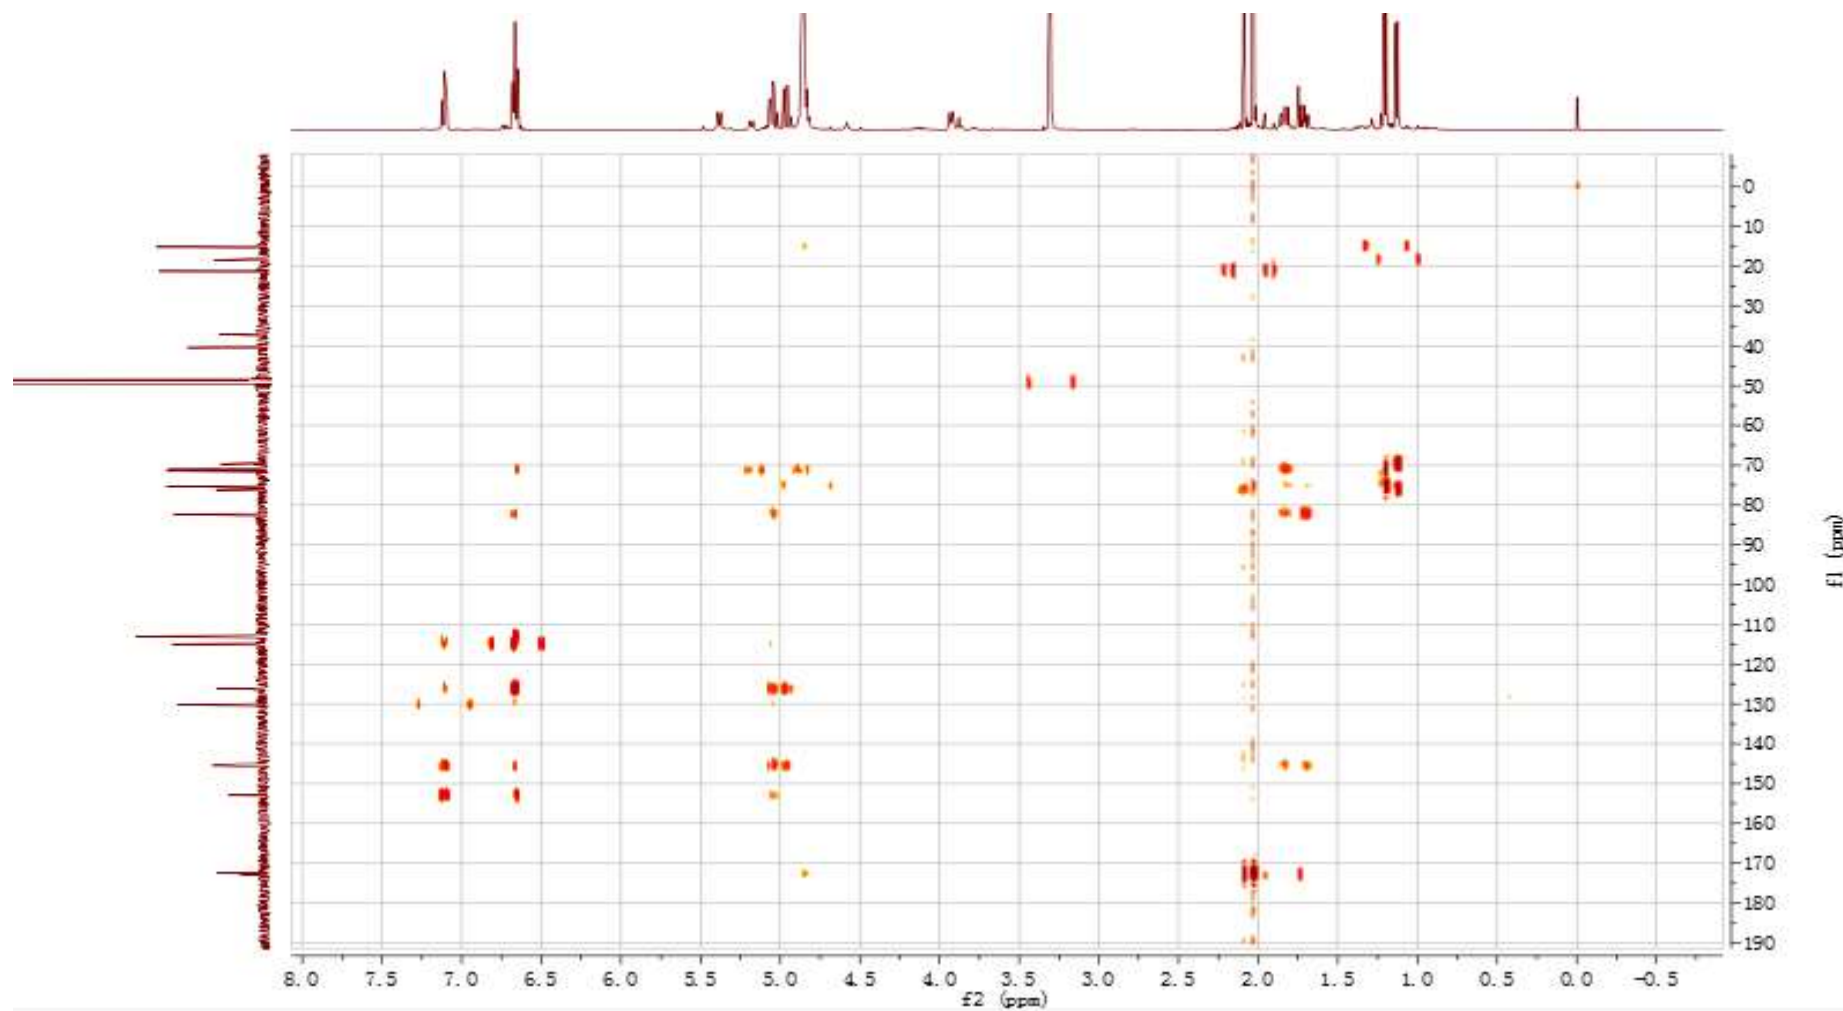

Figure S47. HMBC spectrum of compound **6**

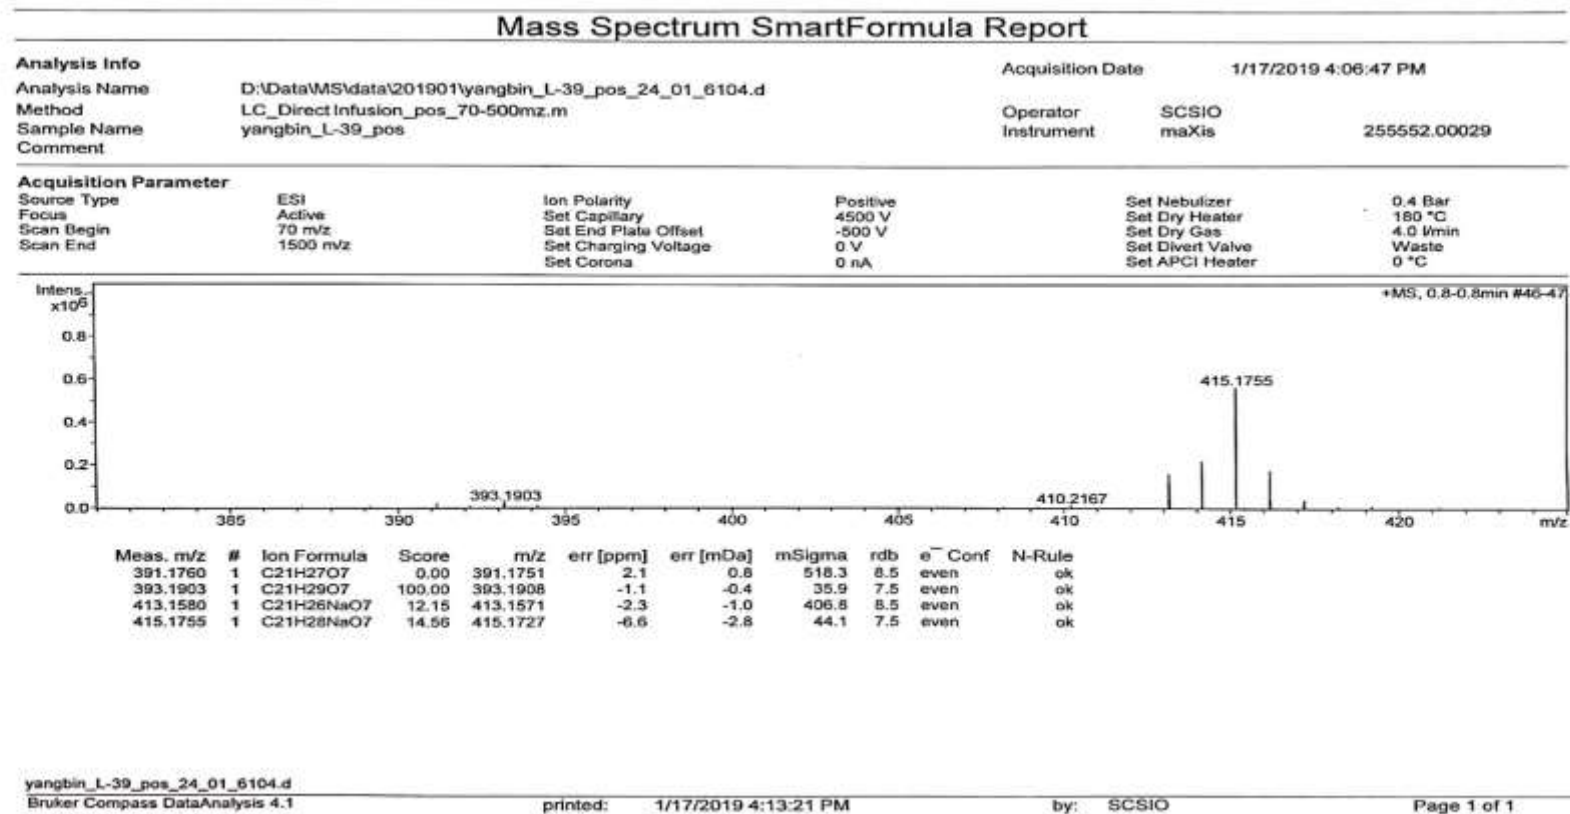

Figure S48. HRESI-MS spectrum of the new compound **7**

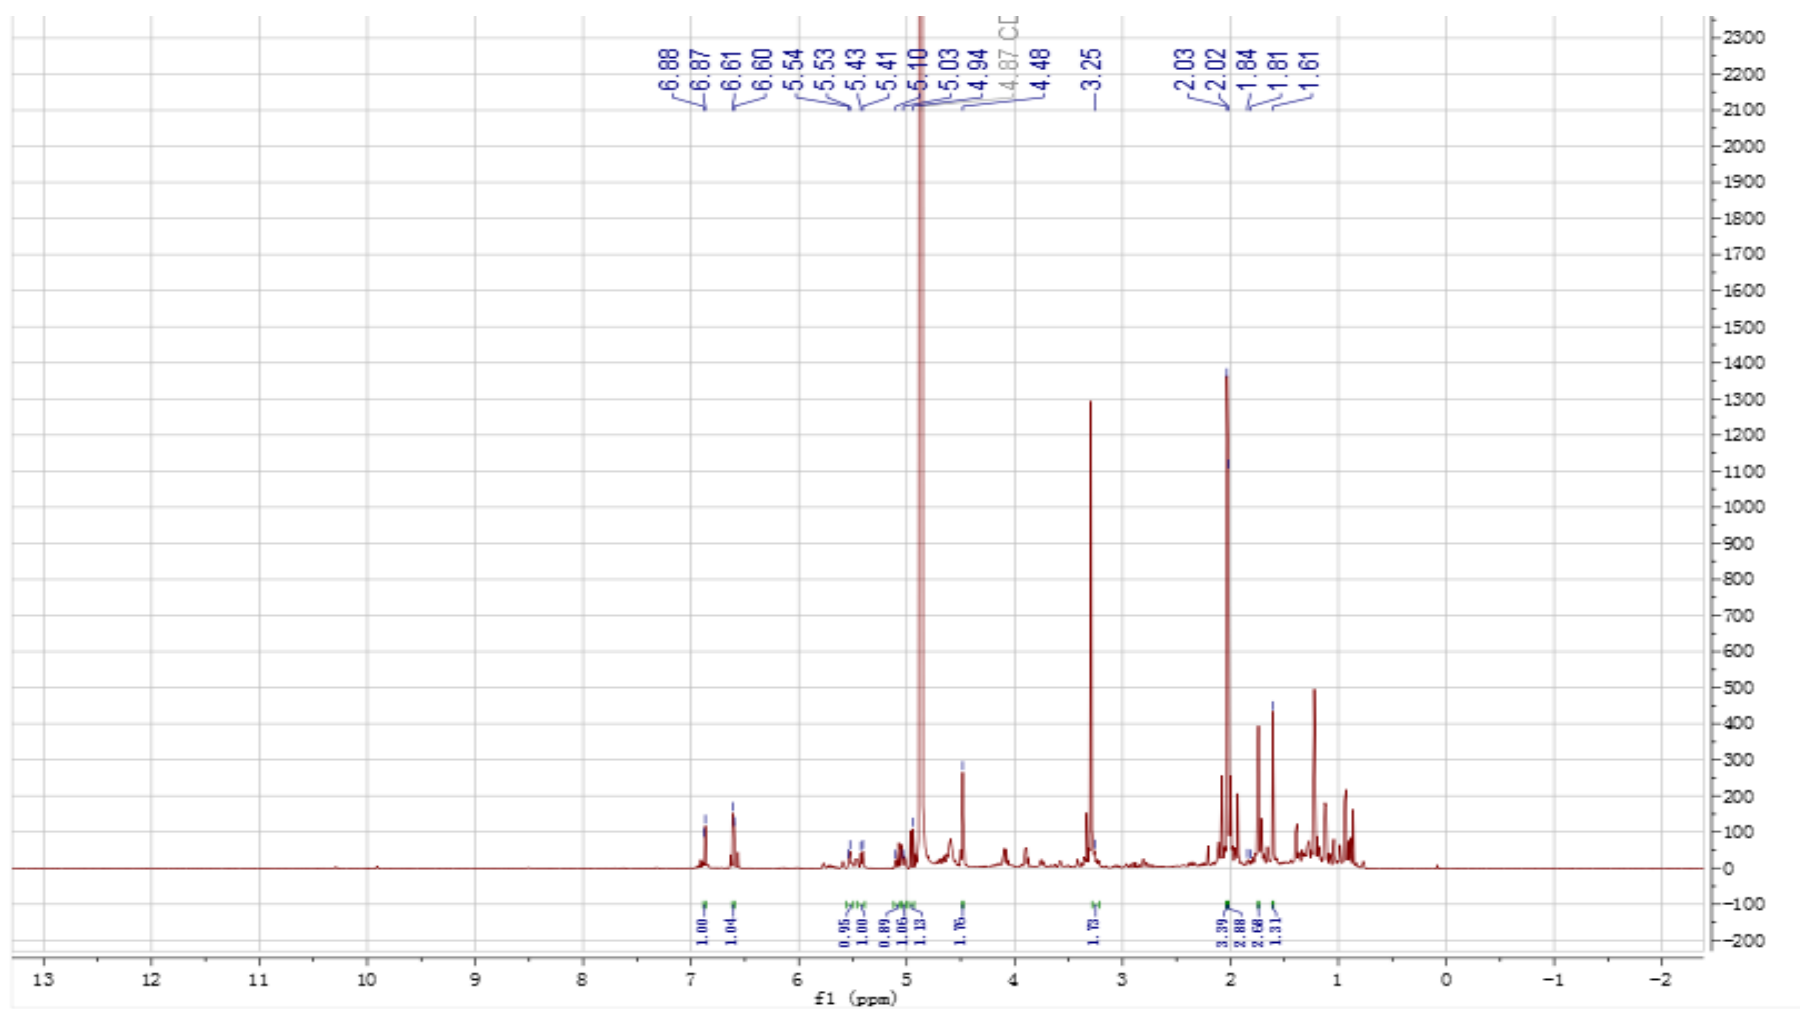

Figure S49.  $^1\text{H}$  NMR (500 MHz,  $\text{CD}_3\text{OD}$ ) spectrum of the new compound **7**

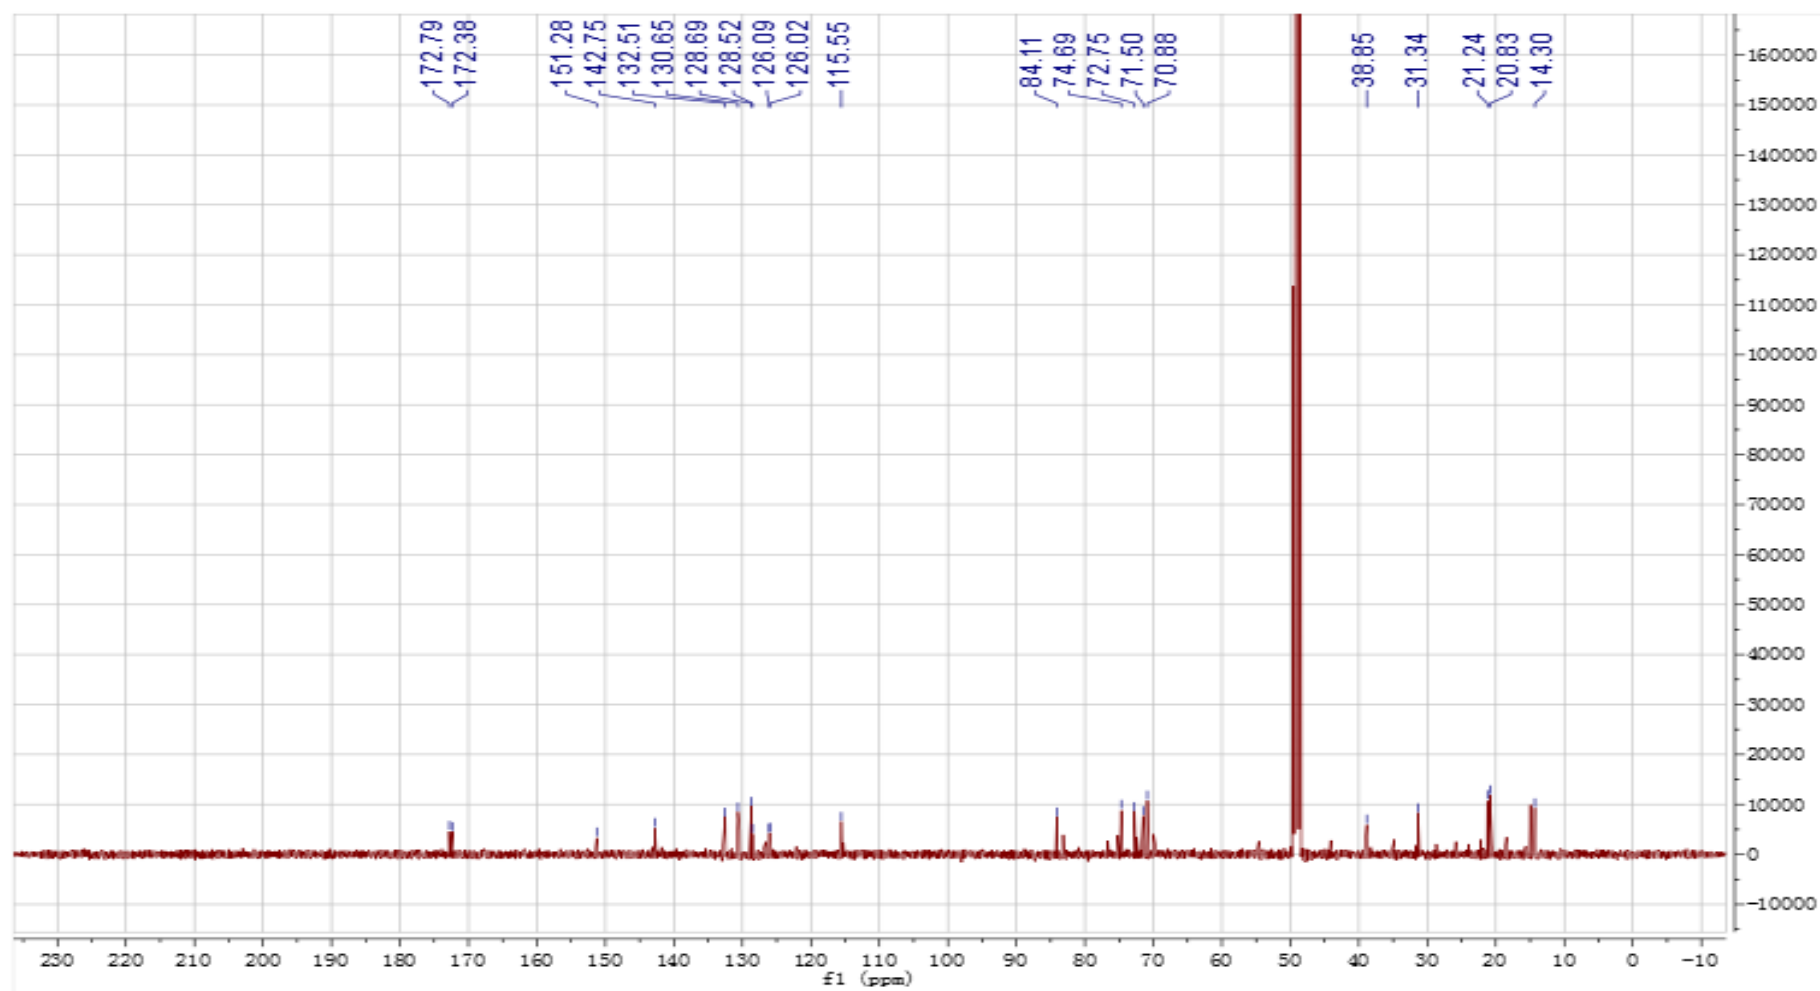

Figure S50. <sup>13</sup>C NMR (125 MHz, CD<sub>3</sub>OD) spectrum of the new compound **7**

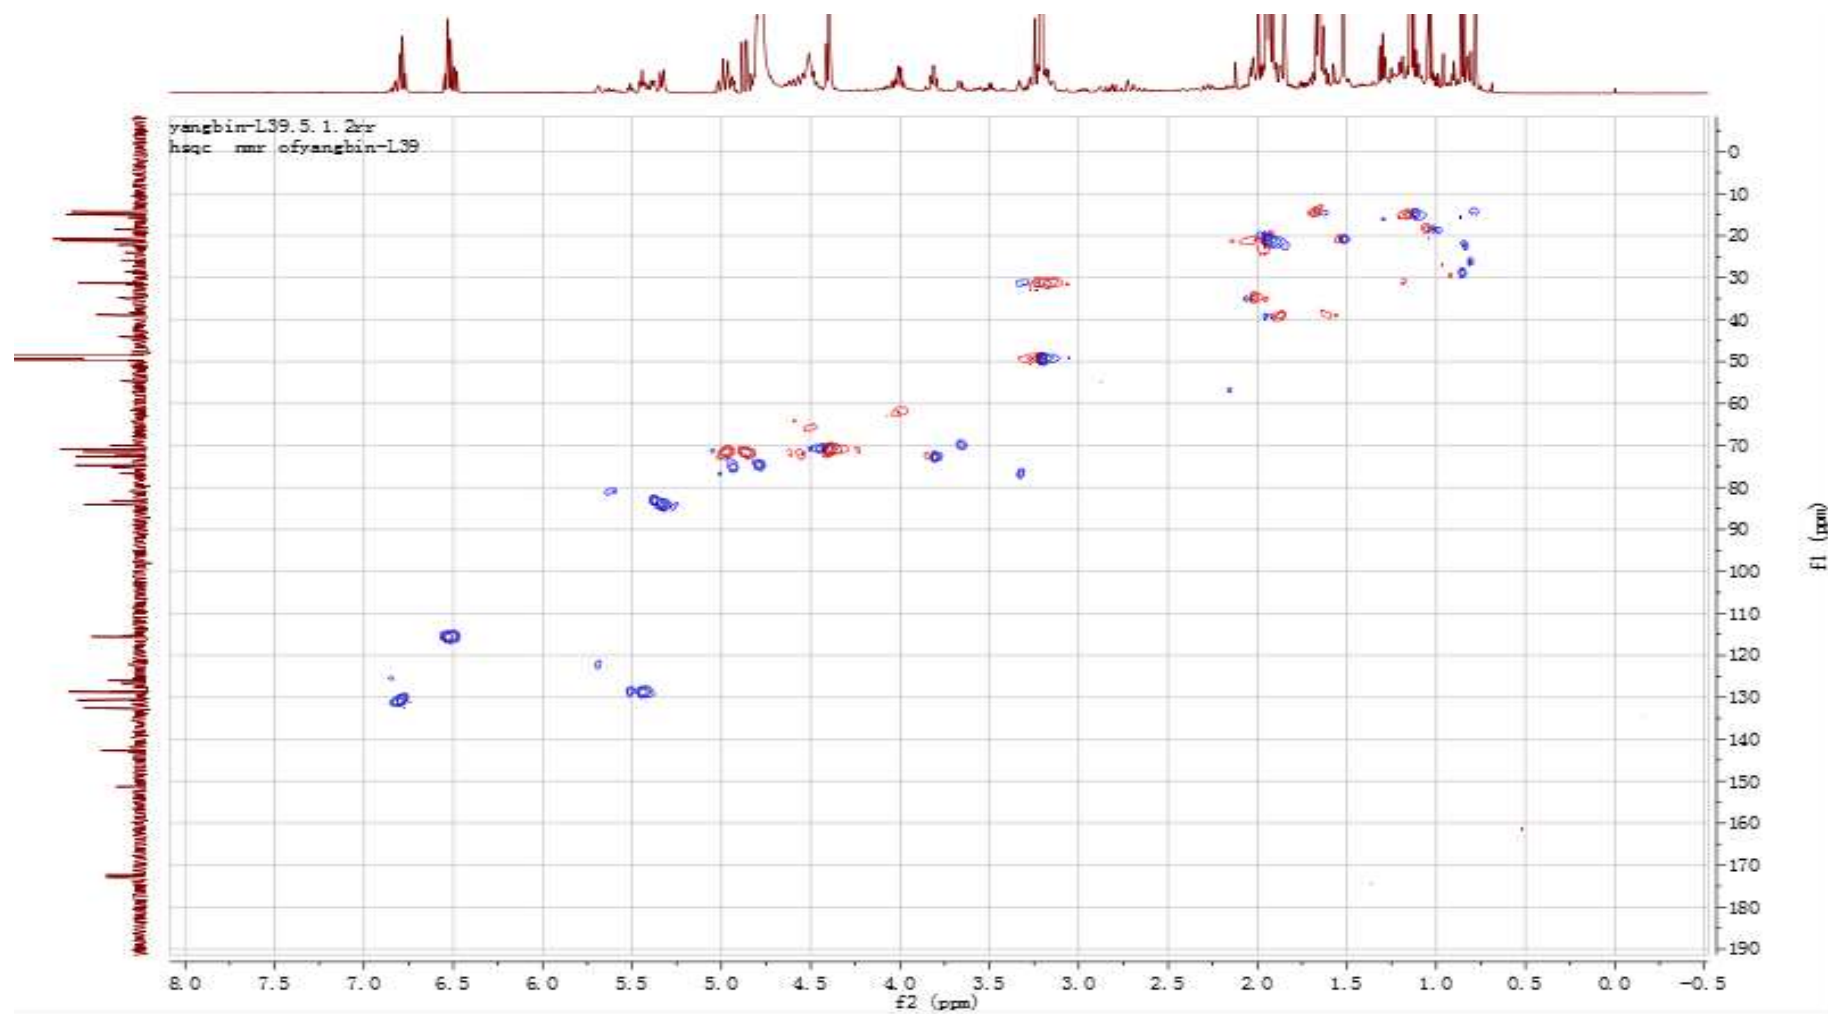

Figure S51. HSQC spectrum of the new compound **7**

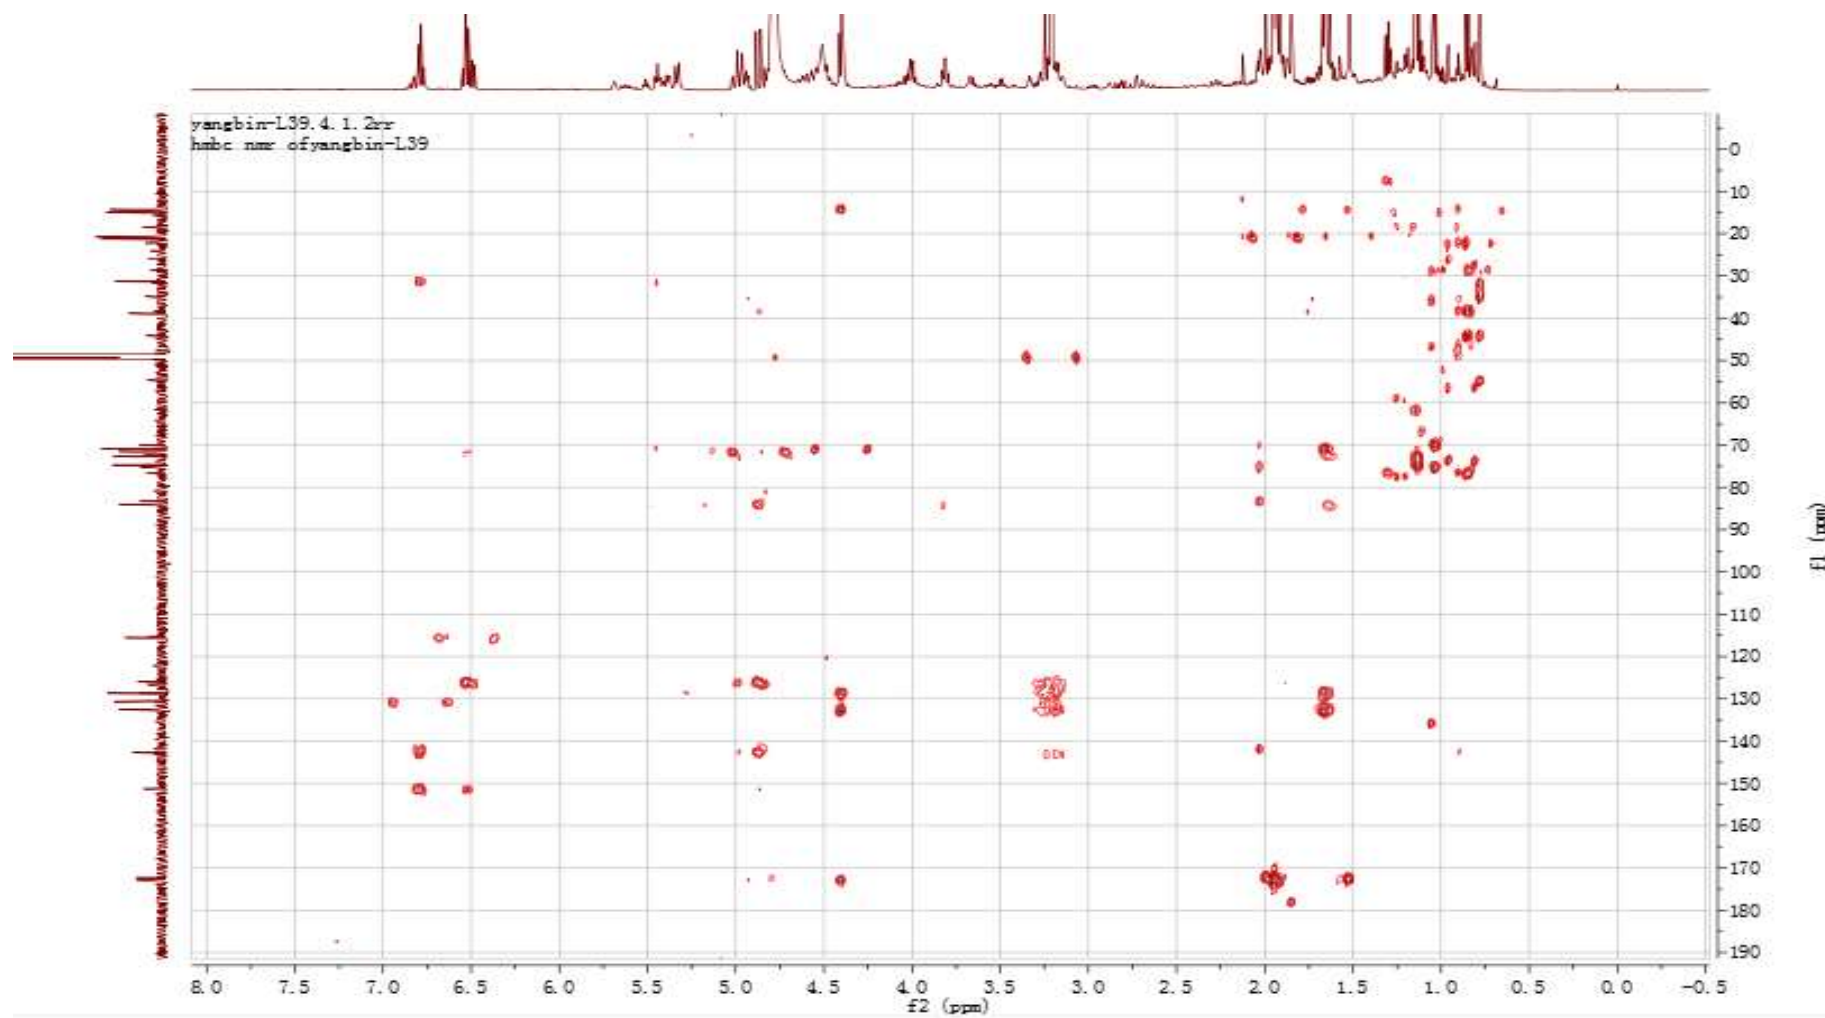

Figure S52. HMBC spectrum of the new compound **7**

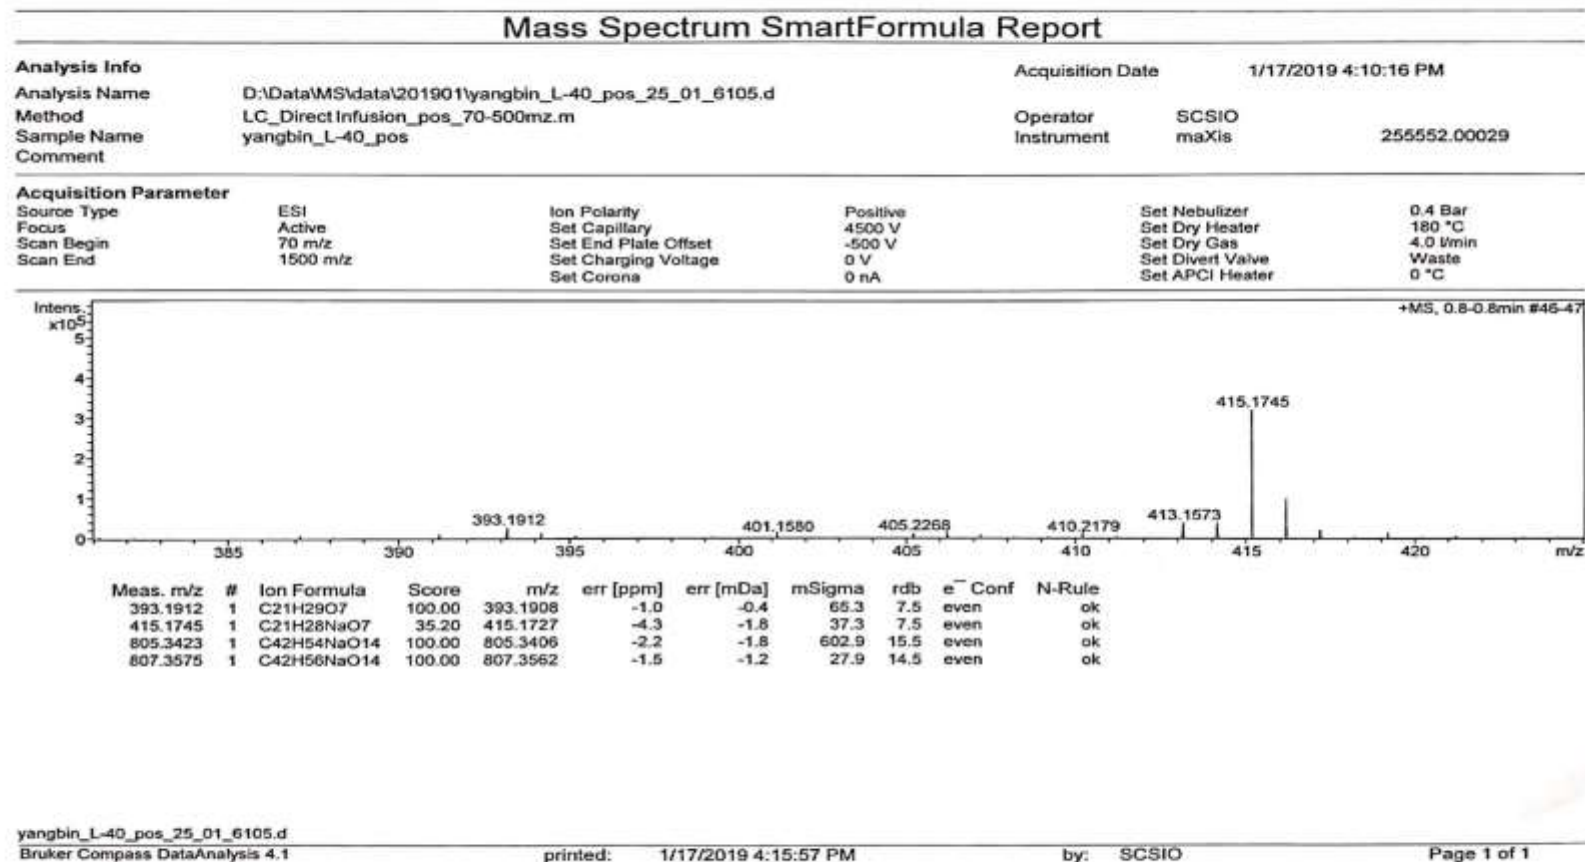

Figure S53. HRESI-MS spectrum of the new compound **8**

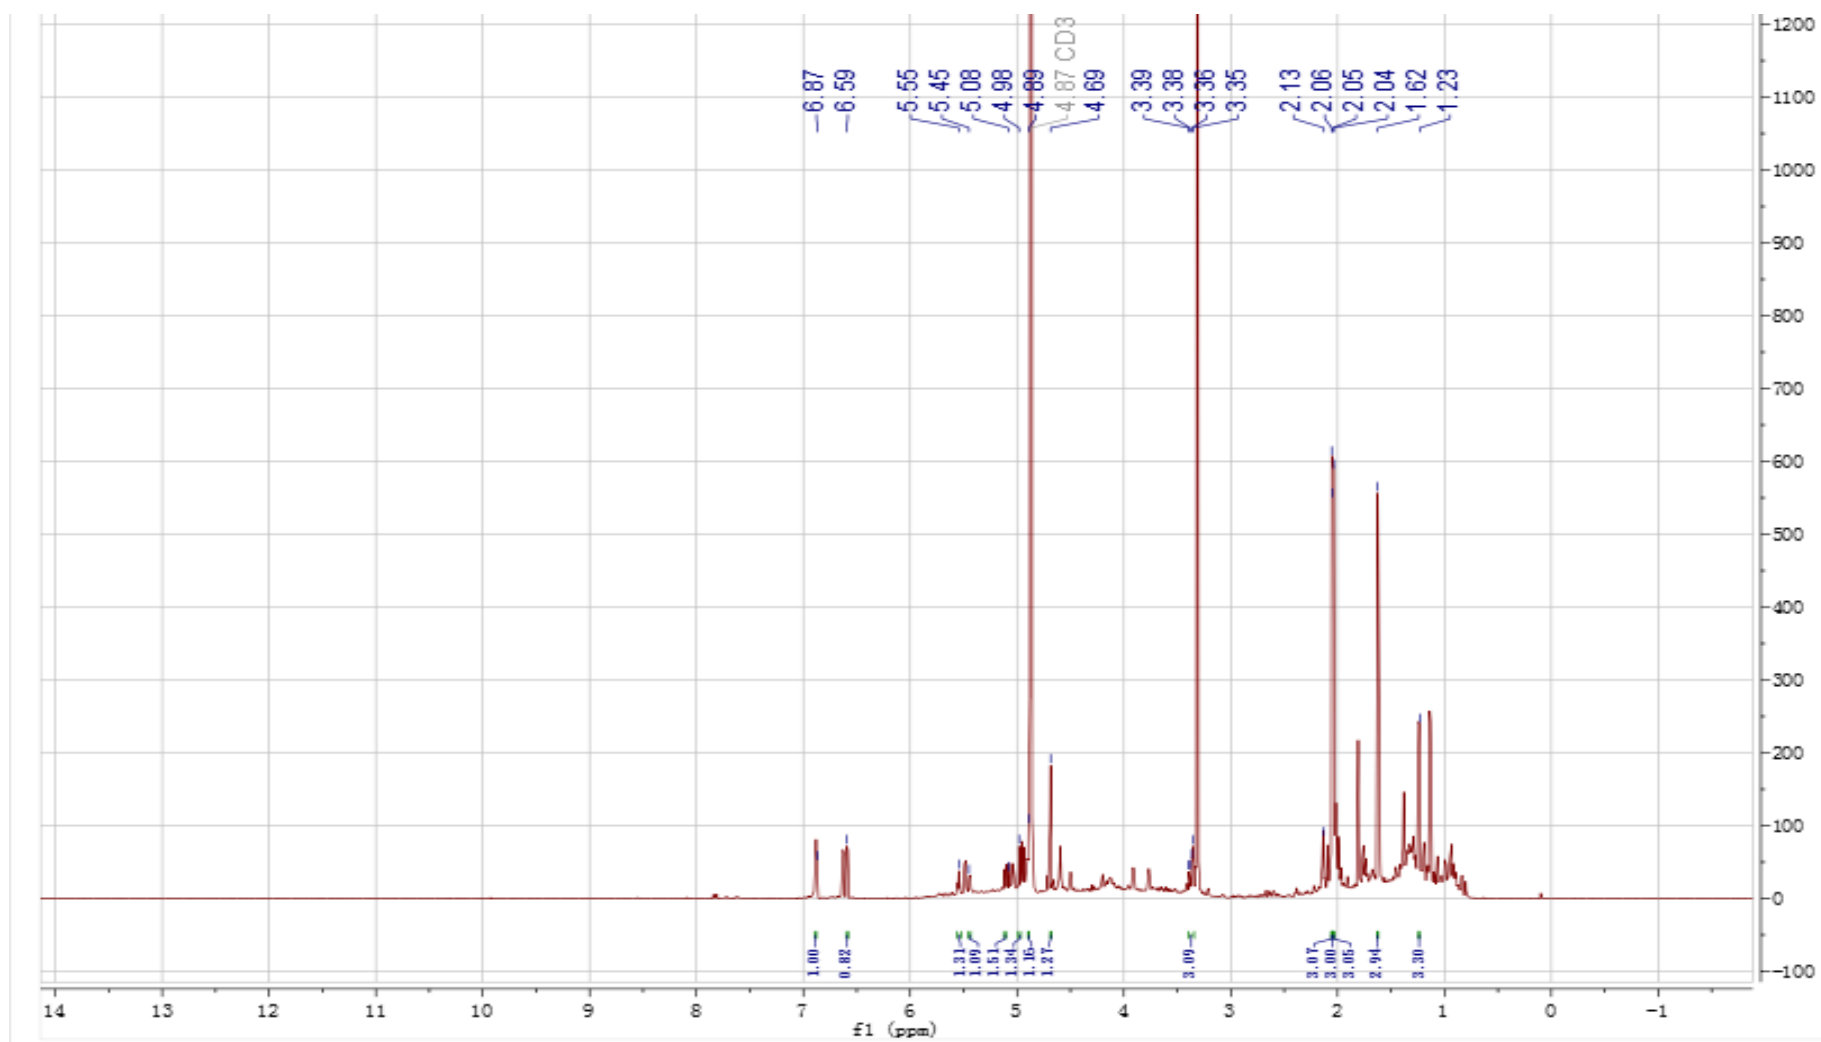

Figure S54. <sup>1</sup>H NMR (500 MHz, CD<sub>3</sub>OD) spectrum of the new compound **8**

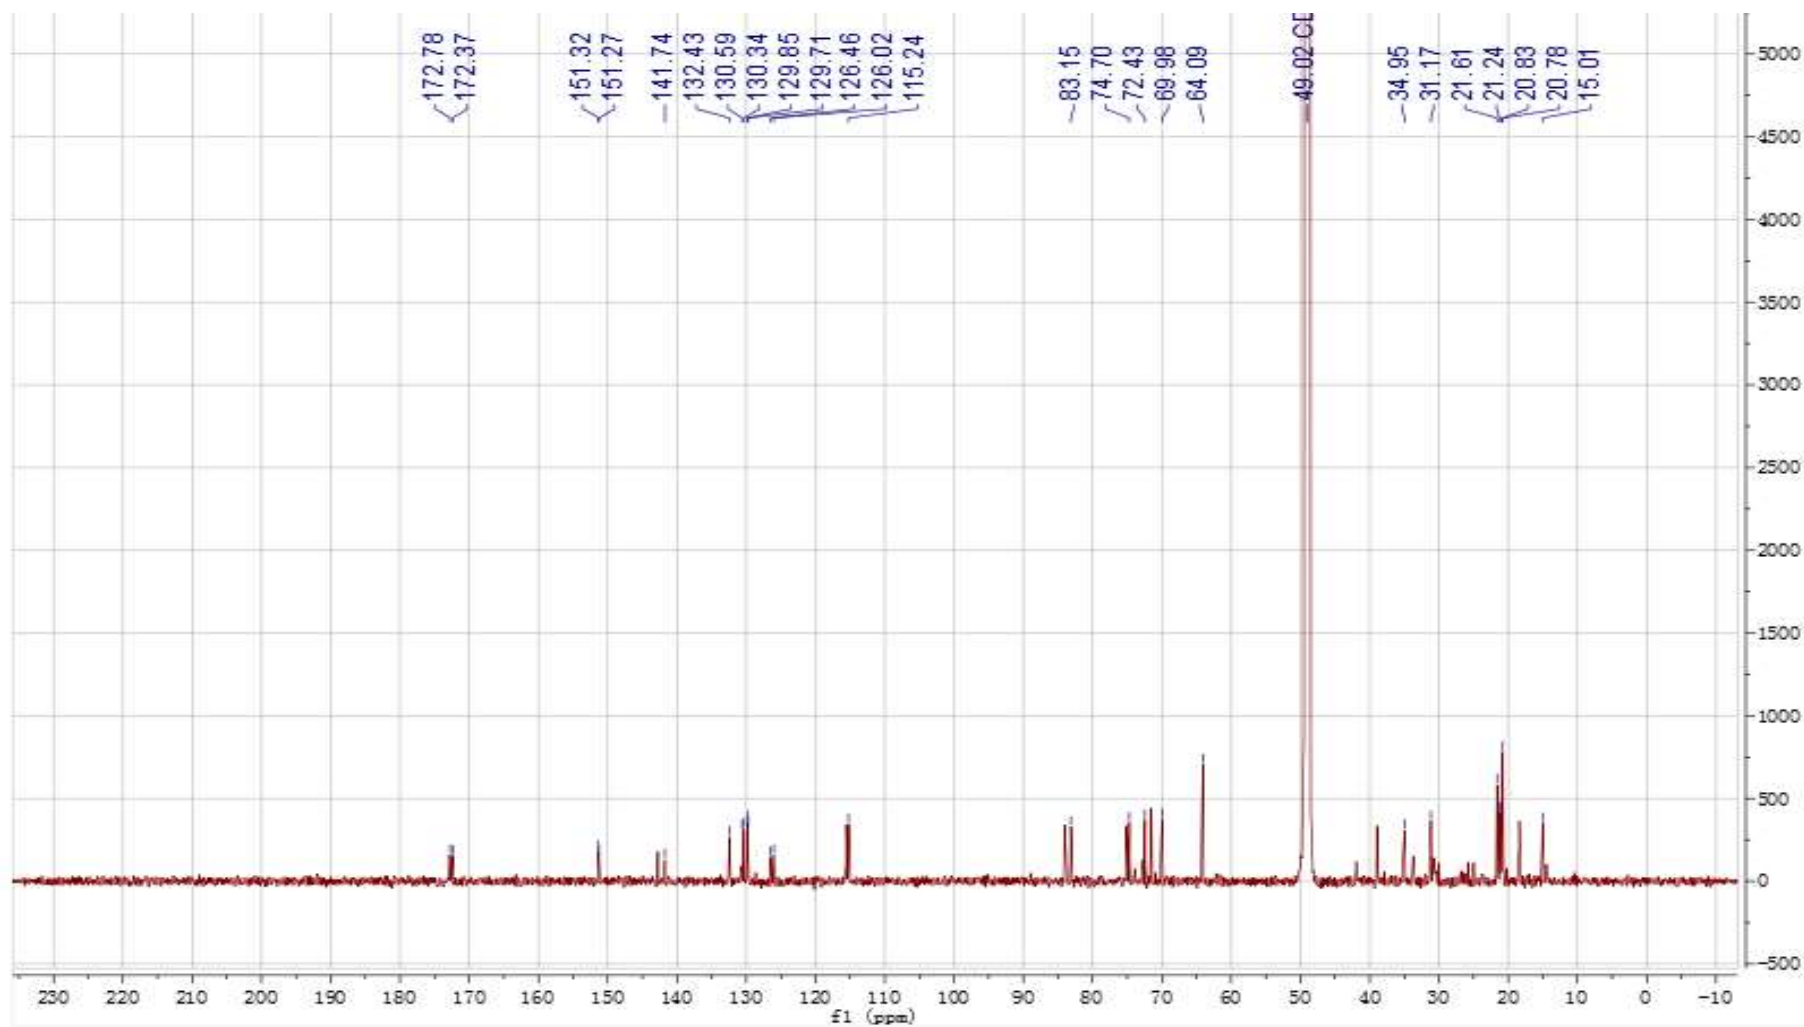

Figure S55. <sup>13</sup>C NMR (125 MHz, CD<sub>3</sub>OD) spectrum of the new compound **8**

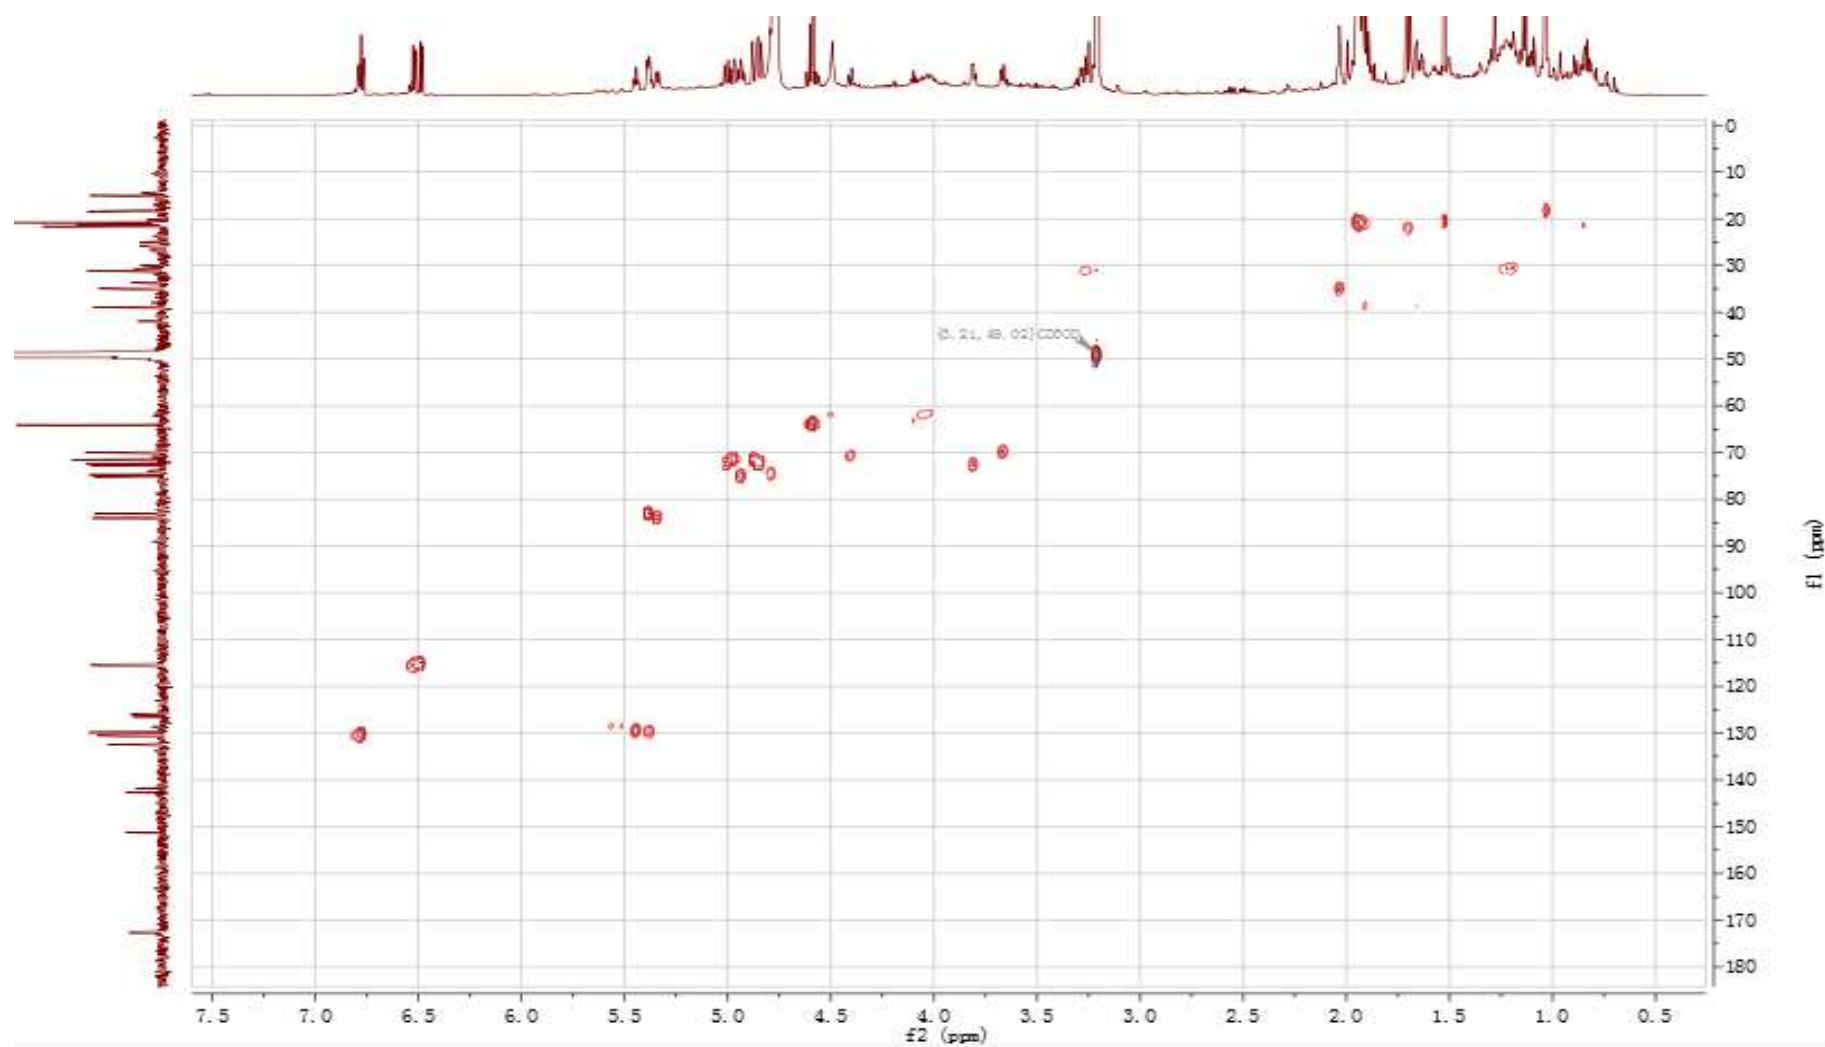

Figure S56. HSQC spectrum of the new compound **8**

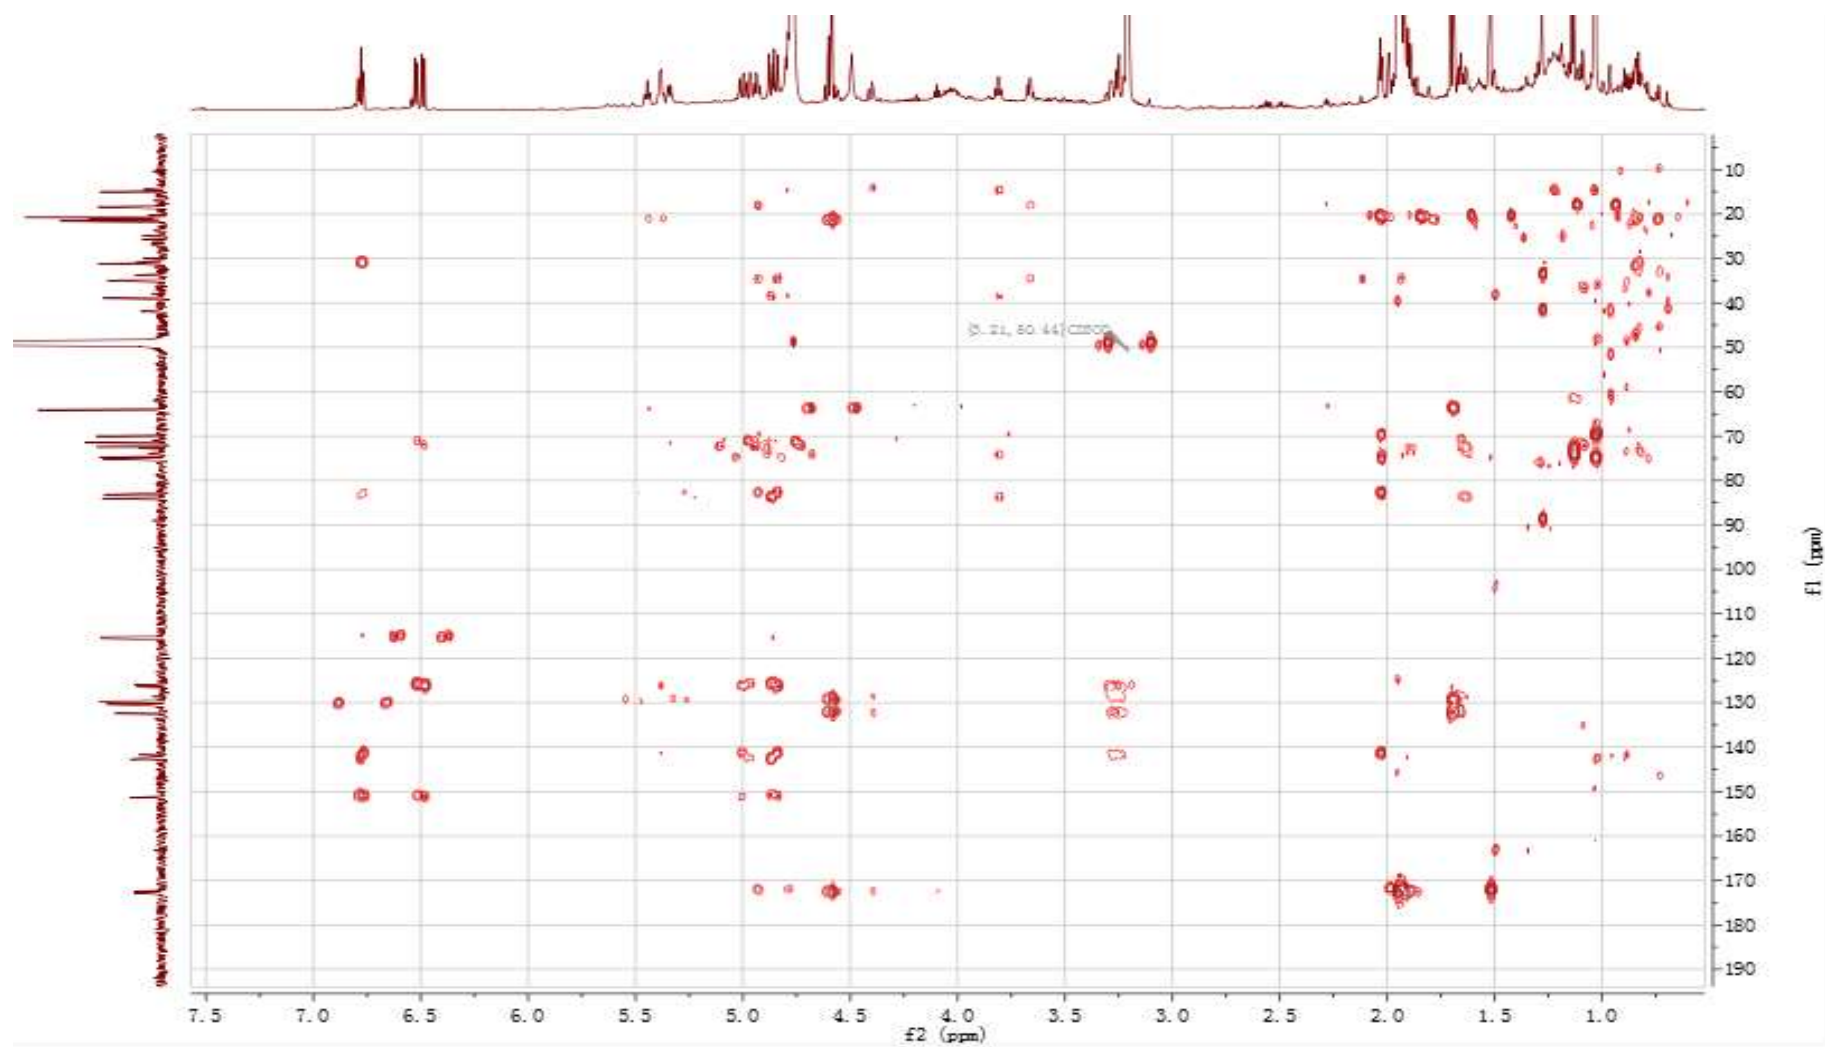

Figure S57. HMBC spectrum of the new compound **8**

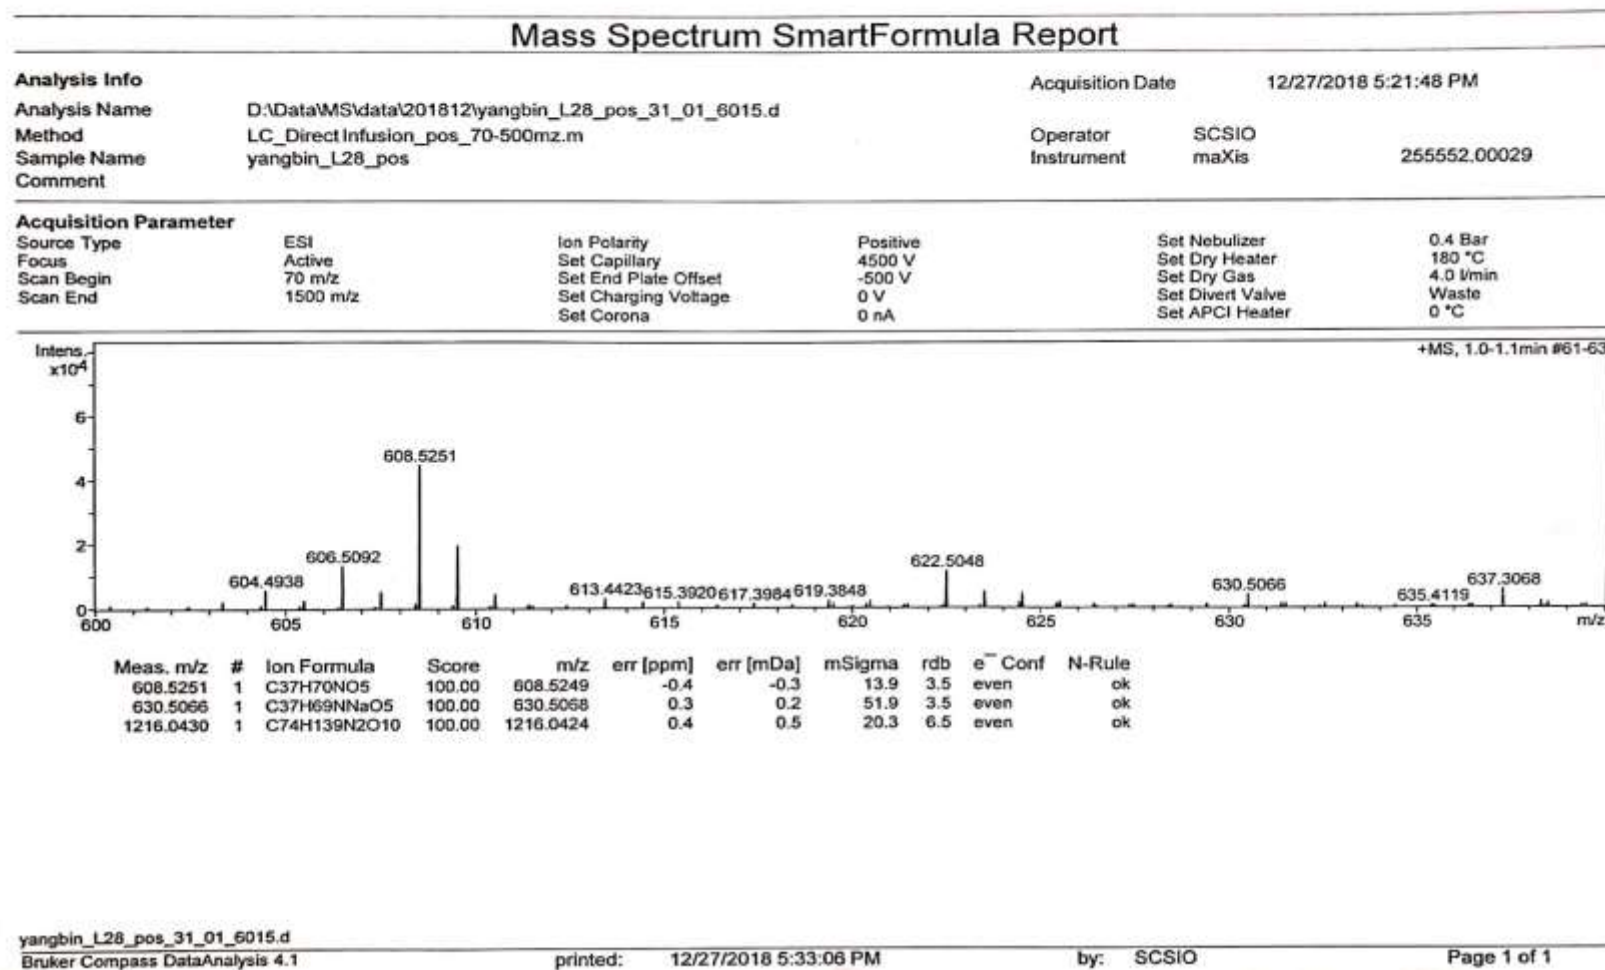

Figure S58. HRESI-MS spectrum of the new compound **9**

Instrument: DSQ (Thermo)  
Ionization Method: EI  
D:\DSQ\DATA-LR\19\010901  
010901 #97 RT: 2.50 AV: 1 NL: 1.15E7  
T: + c Full ms [45.00-800.00]

1/9/2019 10:10:40 AM

L28

第190180022号分析检测报告  
附页第 1 页, 共 1 页

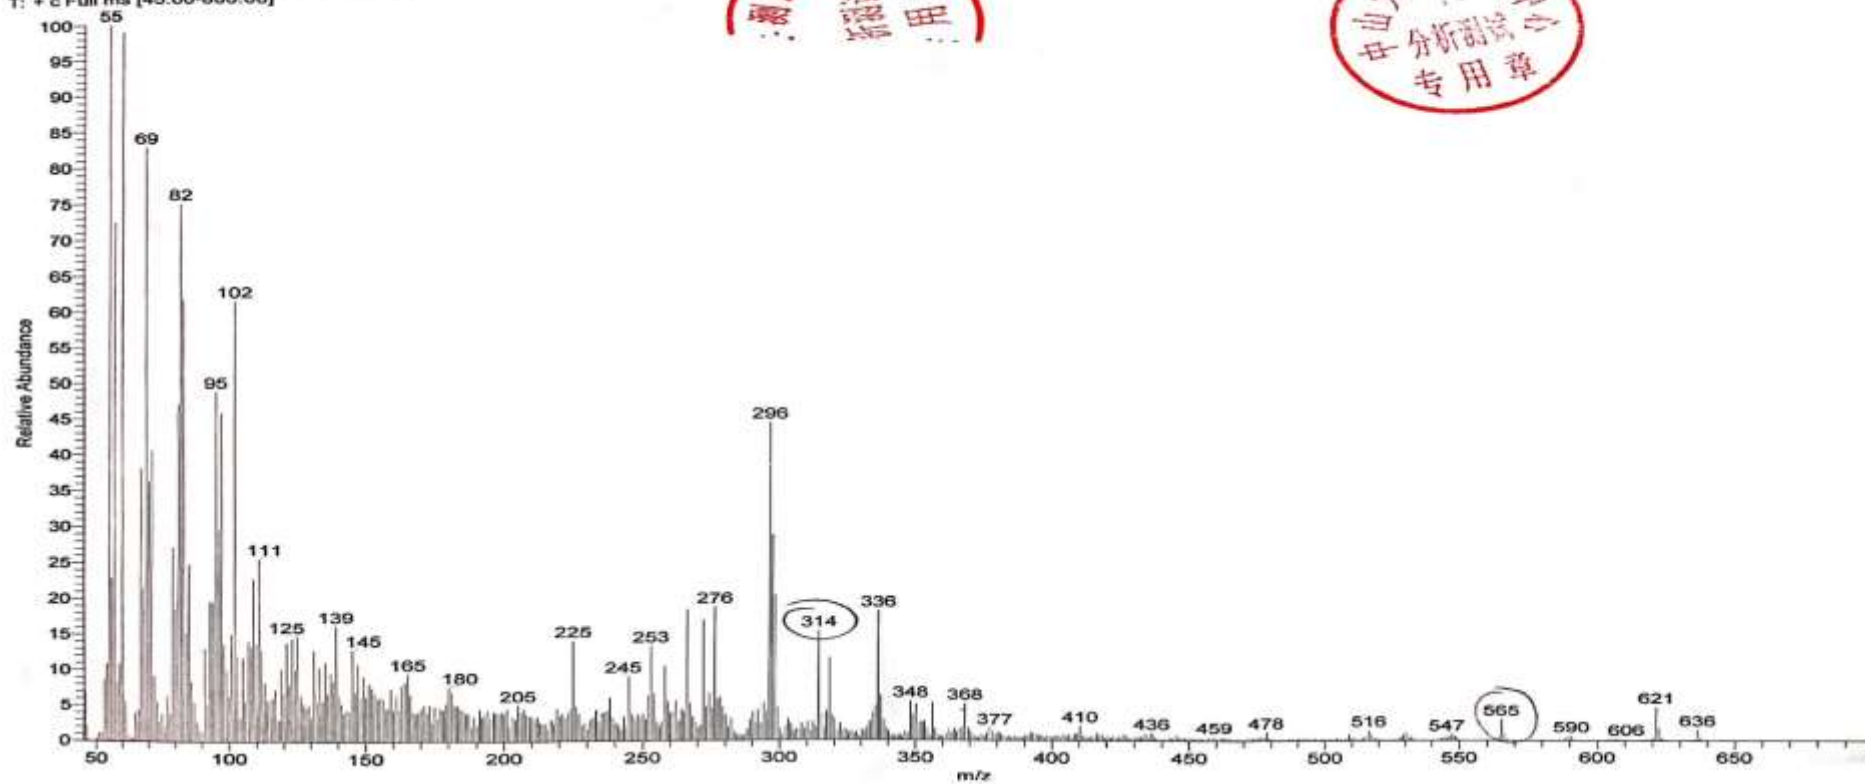

Figure S59. EI-MS spectrum of the new compound **9**

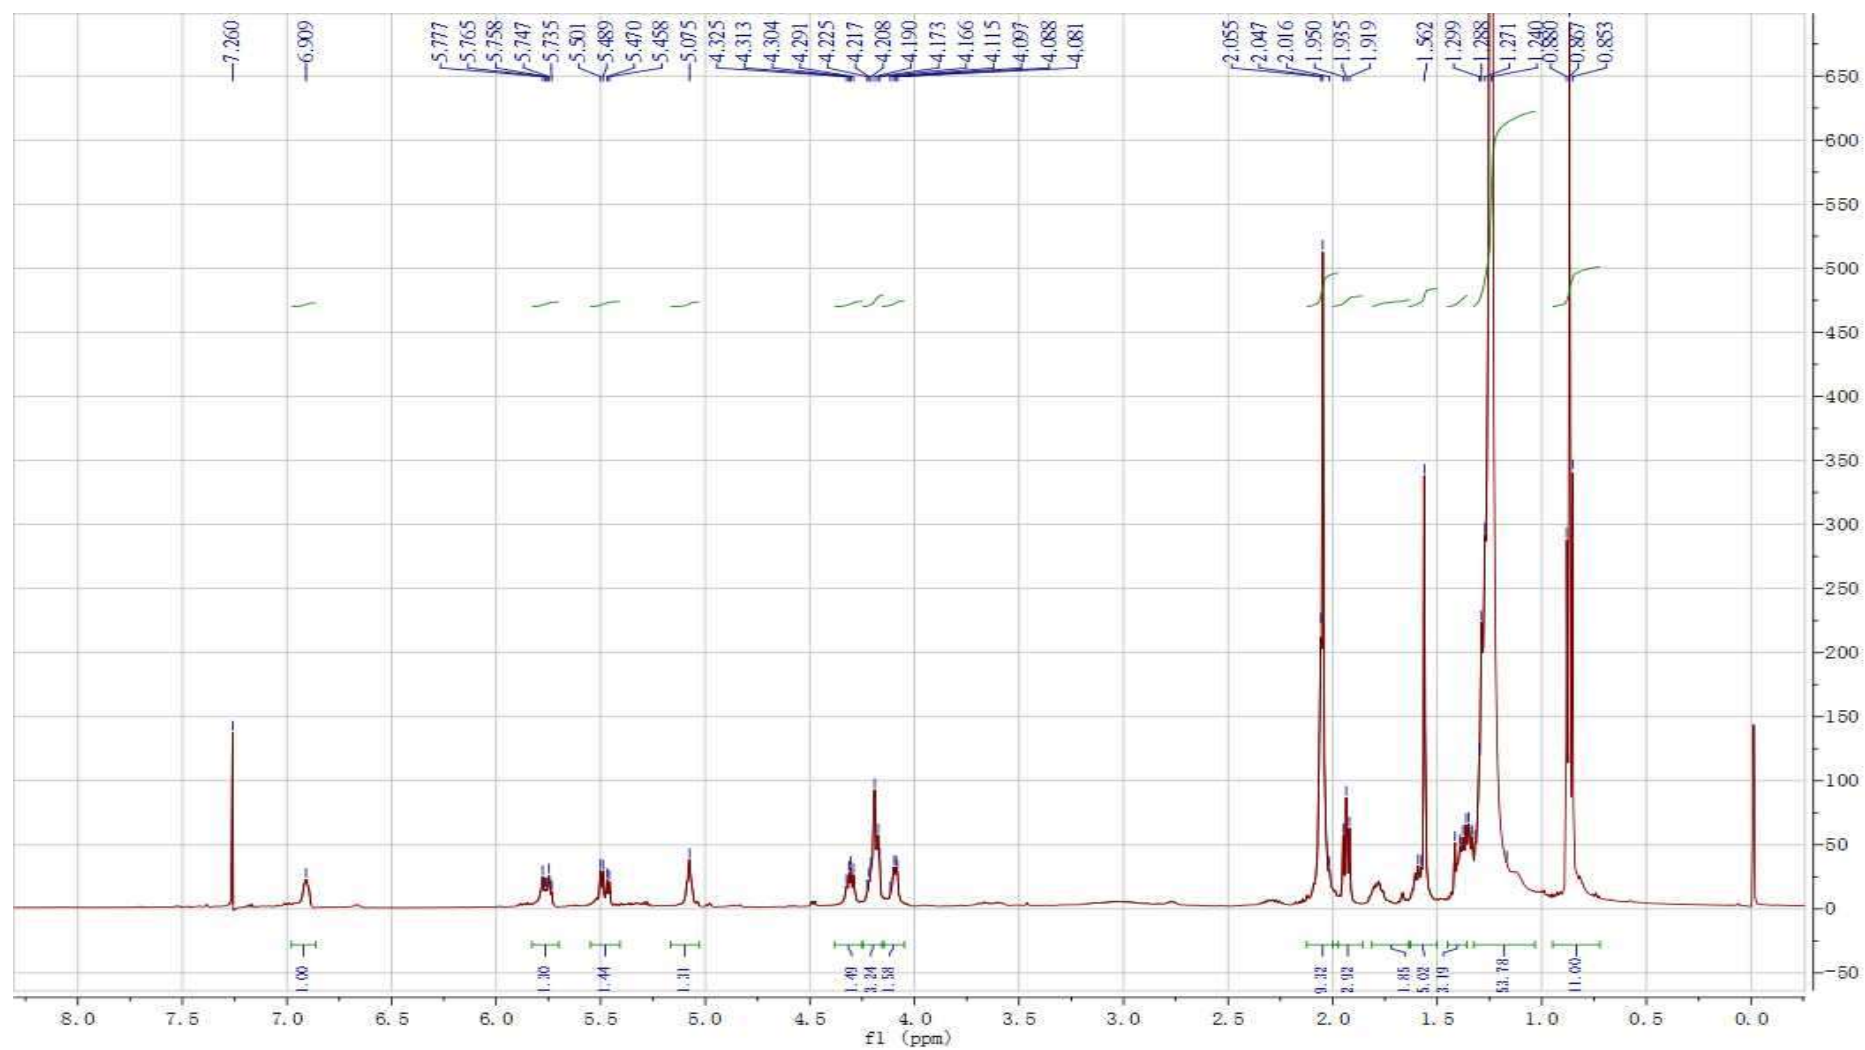

Figure S60. <sup>1</sup>H NMR (500 MHz, CDCl<sub>3</sub>) spectrum of the new compound **9**

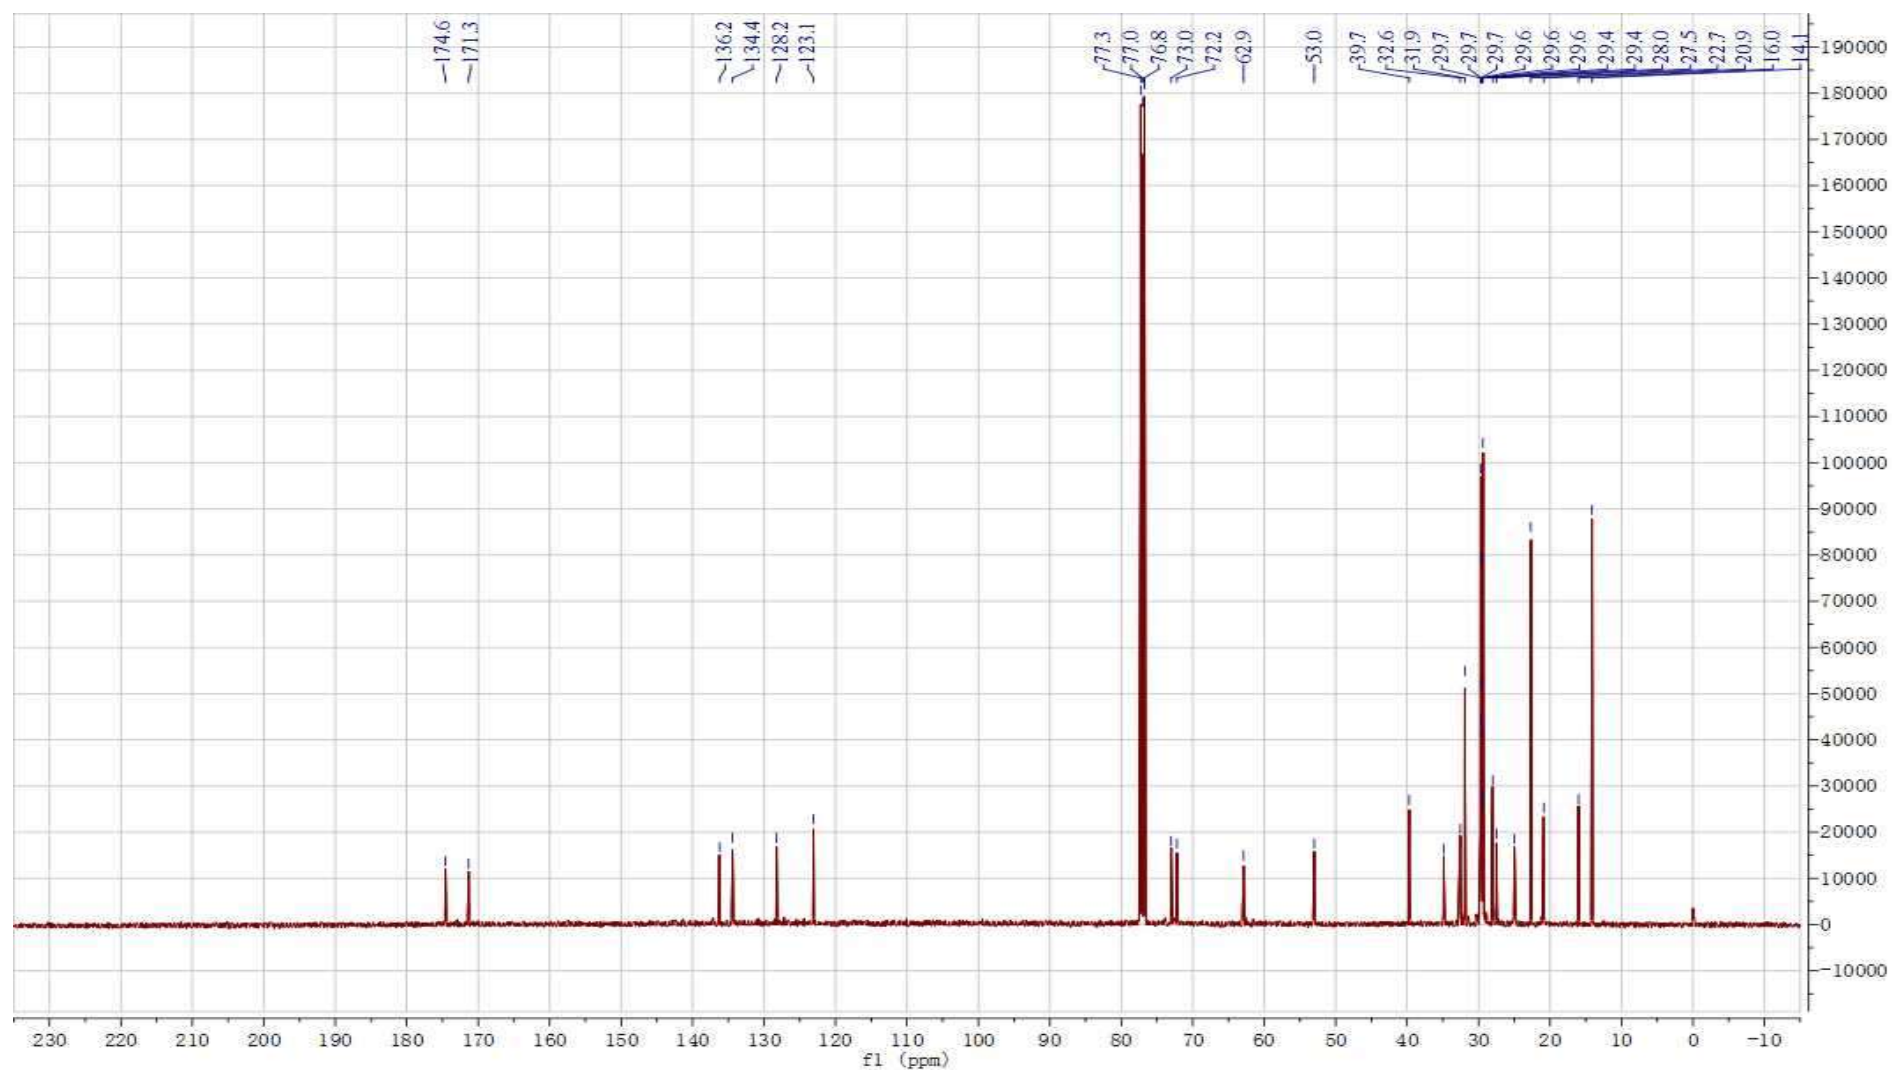

Figure S61.  $^{13}\text{C}$  NMR (125 MHz,  $\text{CDCl}_3$ ) spectrum of the new compound **9**

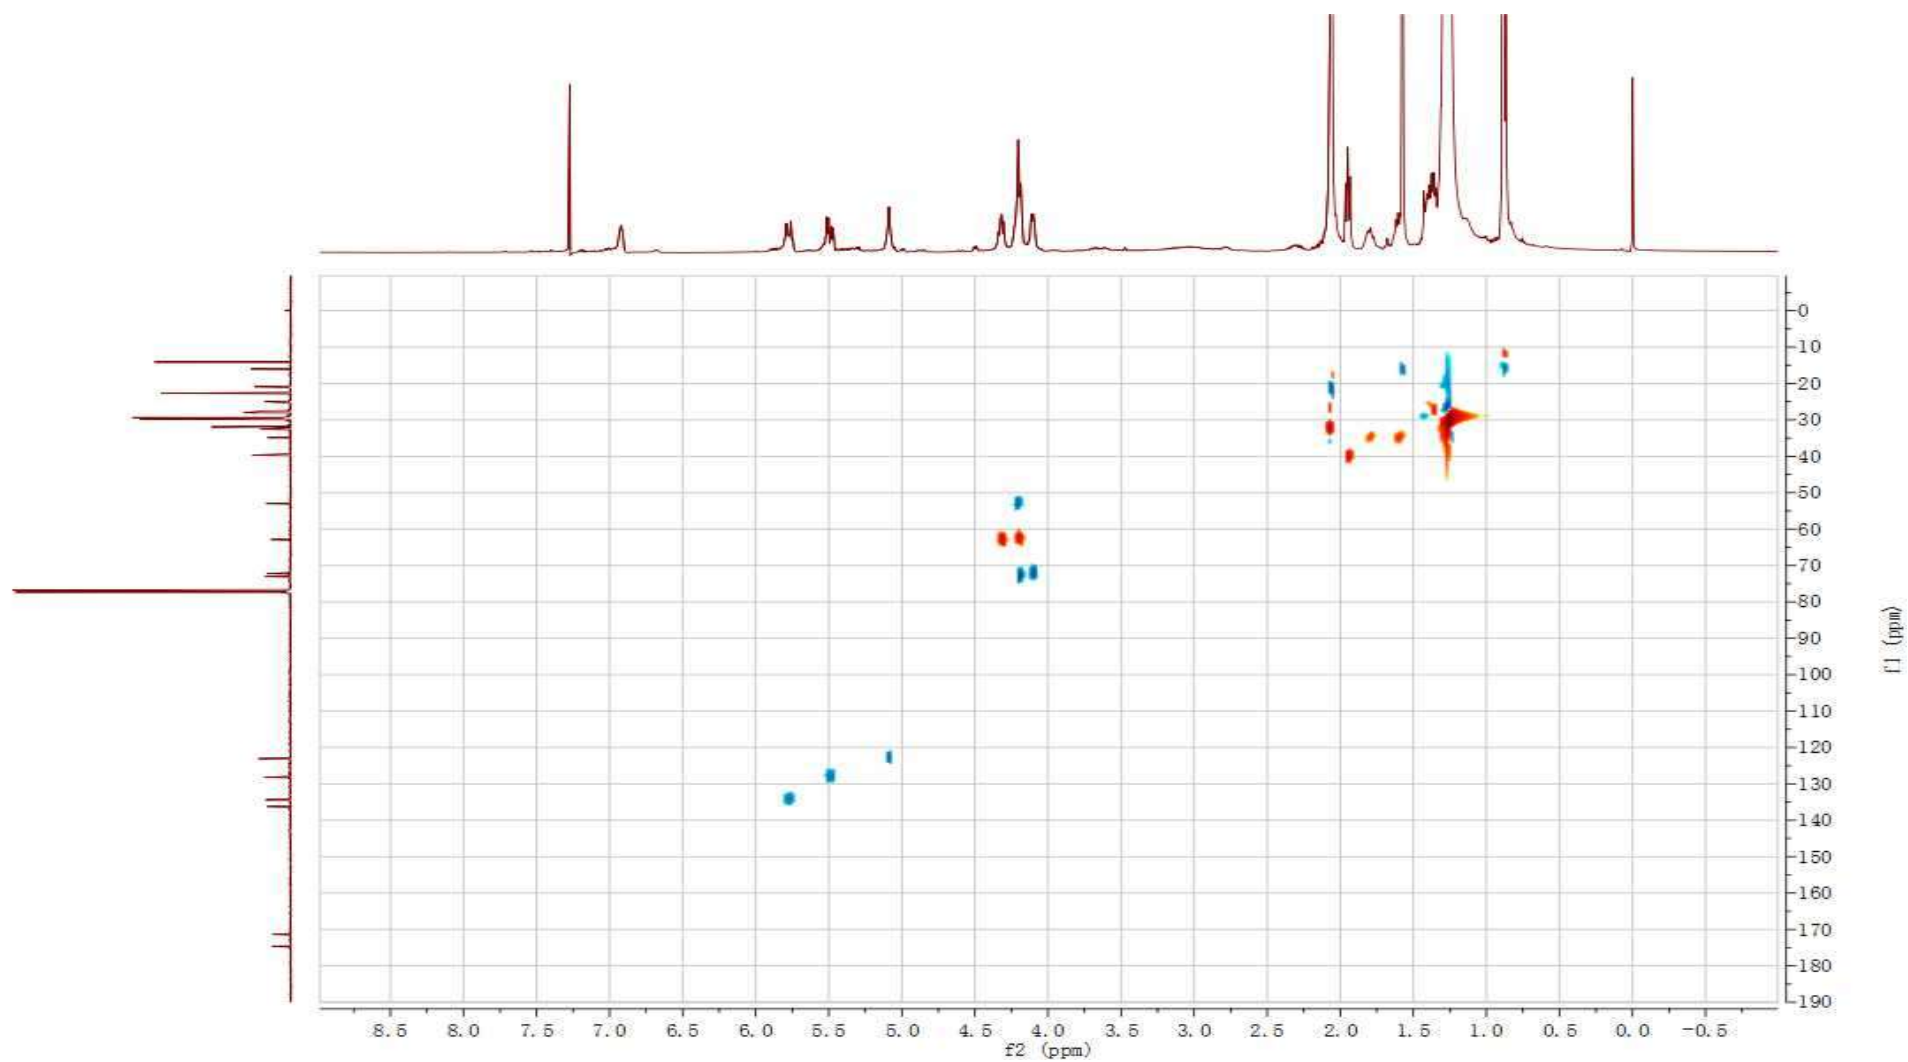

Figure S62. HSQC spectrum of the new compound **9**

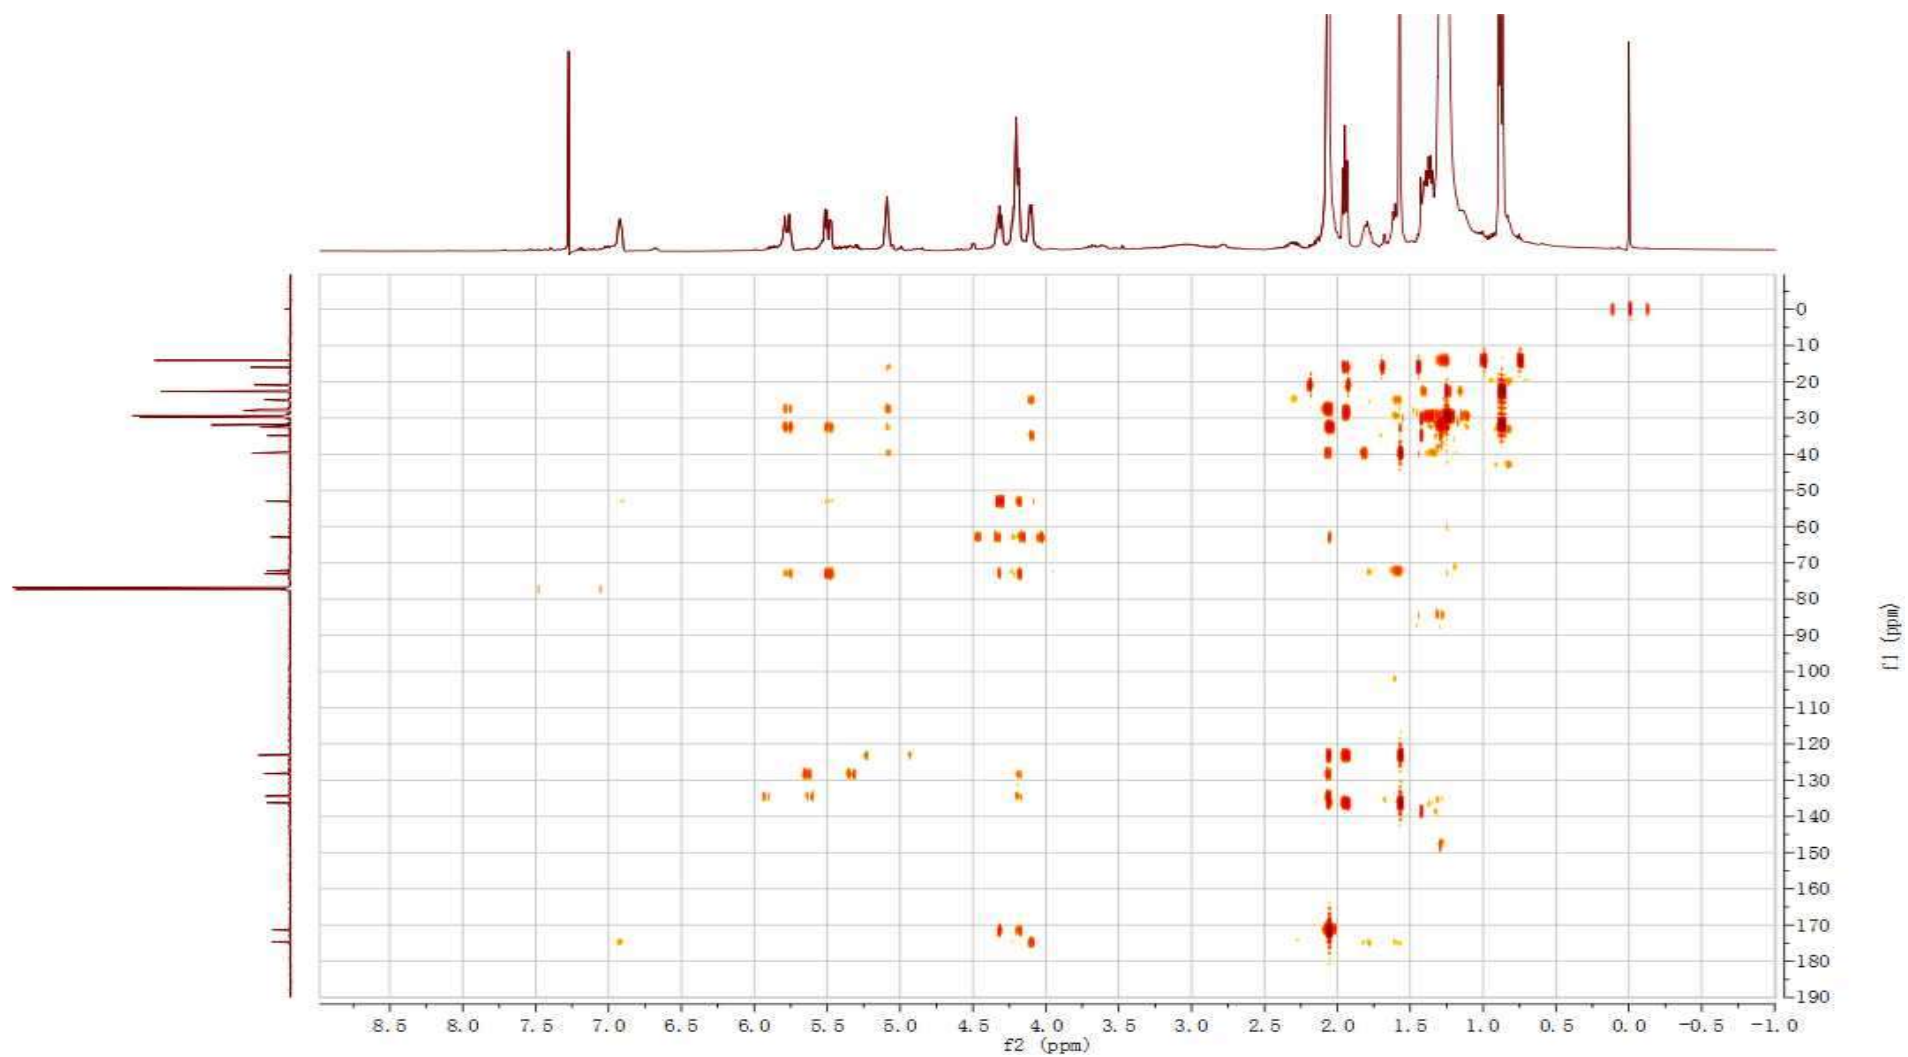

Figure S63. HMBC spectrum of the new compound **9**

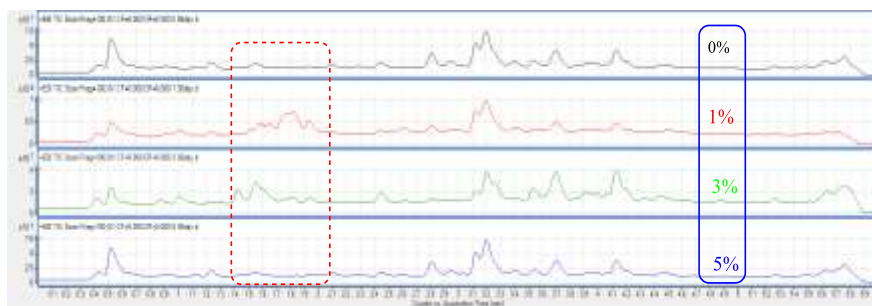

Figure S64. HPLC chromatograms of EtOAc extracts monitored (black line: 0% NaCl rice medium, red line: 1% NaCl rice medium, green line: 3% NaCl rice medium, blue line: 5% NaCl rice medium).
